# Supplementary material for: Transcriptional Program of Ciliated Epithelial Cells Reveals New Cilium and Centrosome Components and Links to Human Disease
Source: PLoS One. 2012 Dec 31;7(12):e52166. doi: 10.1371/journal.pone.0052166 (PMC3534086; doi:10.1371/journal.pone.0052166)
Supplement: Table S1 — Subtracted ALI+4 transcriptome. (XLSX) [file pone.0052166.s001.xlsx]

## Sheet: ALI+4 (subtracted)
Table S1. Subtracted ALI+4 Transcriptome
Gene.Name	Gene.Symbol	Accession	M = log2 fold change	adj.P.Val
meiosis-specific nuclear structural protein 1	Mns1	NM_008613	7.28182	0.00226213
AMY-1-associating protein expressed in testis 1	Aat1	XM_489540	6.72798	0.00610495
leucine rich repeat containing 34	Lrrc34	XM_487721	6.56922	0.00562364
anterior gradient homolog 3	Agr3	NM_207531	6.5634	0.00226213
transformed mouse 3T3 cell double minute 1	Mdm1	NM_148922	6.39664	0.0024694
dynein, axonemal, heavy chain 2	Dnahc2	NM_177617	6.36378	0.00226213
coiled-coil domain containing 39	Ccdc39	NM_026222	6.15111	0.00249212
coiled-coil domain containing 39	Ccdc39	NM_026222	6.09306	0.00249212
transformed mouse 3T3 cell double minute 1	Mdm1	NM_010785	6.07576	0.00243093
RIKEN cDNA 1700013F07 gene	1700013F07Rik	XM_131080	6.06241	0.00404085
leucine rich repeat containing 67	Lrrc67	NM_145692	6.01704	0.0022281
leucine rich repeat containing 6 (testis)	Lrrc6	NM_019457	5.98551	0.00374251
RIKEN cDNA 1700028P14 gene	1700028P14Rik	NM_026188	5.9338	0.00226213
ropporin 1-like	Ropn1l	NM_145852	5.898	0.00460704
RIKEN cDNA 4930504H06 gene	4930504H06Rik	XM_126856	5.88921	0.00268321
RIKEN cDNA A330021E22 gene	A330021E22Rik	NM_172447	5.8683	0.00373697
D-aspartate oxidase	Ddo	NM_027442	5.85923	0.0022281
storkhead box 1	Stox1	XM_125685	5.84537	0.00226213
cytidine monophosphate (UMP-CMP) kinase 2, mitochondrial	Cmpk2	NM_020557	5.83088	0.00249212
neuralized homolog 1A (Drosophila)	Neurl1a	NM_021360	5.74539	0.00249212
malate dehydrogenase 1B, NAD (soluble)	Mdh1b	NM_029696	5.67273	0.00497144
WD repeat domain 65	Wdr65	NM_026789	5.66487	0.00226213
RIKEN cDNA 4833427G06 gene	4833427G06Rik	NM_177702	5.60649	0.00654243
PIH1 domain containing 2	Pih1d2	NM_028300	5.52402	0.00226213
calmodulin-like 4	Calml4	NM_138304	5.40992	0.00610495
myeloid leukemia factor 1	Mlf1	NM_010801	5.40498	0.00732759
DPY30 domain containing 2	Dydc2	XM_127662	5.40435	0.00226213
RIB43A domain with coiled-coils 1	Ribc1	NM_025660	5.3852	0.00313952
RIKEN cDNA A330021E22 gene	A330021E22Rik	NM_172447	5.31648	0.00661823
tetratricopeptide repeat domain 16	Ttc16	NM_177384	5.30112	0.00249212
sperm associated antigen 6	Spag6	NM_015773	5.25921	0.00226213
RIKEN cDNA 1700026L06 gene	1700026L06Rik	XM_130129	5.24971	0.00859276
WD repeat domain 78	Wdr78	NM_146254	5.24015	0.0108358
cyclin A1	Ccna1	NM_007628	5.20525	0.00424027
translin-associated factor X (Tsnax) interacting protein 1	Tsnaxip1	NM_024445	5.20017	0.00562364
tetratricopeptide repeat domain 18	Ttc18	XM_127606	5.18613	0.00695768
polo-like kinase 4 (Drosophila)	Plk4	NM_011495	5.14752	0.00569561
creatine kinase, brain	Ckb	NM_021273	5.13816	0.00226213
coiled-coil domain containing 18	Ccdc18	XM_144475	5.12297	0.00568444
radial spokehead-like 3	Rshl3	XM_137041	5.09939	0.00711354
RIKEN cDNA 1700001L19 gene	1700001L19Rik	XM_127414	5.05307	0.00582312
leucine-rich repeats and guanylate kinase domain containing	Lrguk	XM_133060	5.04996	0.00226213
four and a half LIM domains 1	Fhl1	NM_010211	5.03336	0.0149669
myeloblastosis oncogene	Myb	NM_010848	5.01907	0.00968608
WD repeat domain 78	Wdr78	NM_146254	4.96743	0.00884684
coiled-coil domain containing 81	Ccdc81	XM_133659	4.91514	0.00226213
myosin, light polypeptide 4	Myl4	NM_010858	4.90161	0.00654243
kelch domain containing 9	Klhdc9	XM_287054	4.89761	0.00226213
rhabdoid tumor deletion region gene 1	Rtdr1	XM_354544	4.89483	0.00249212
tetratricopeptide repeat domain 25	Ttc25	XM_126529	4.87783	0.00497144
RIKEN cDNA E030011K20 gene	E030011K20Rik	XM_149293	4.86469	0.003227
RIKEN cDNA 1190002A17 gene	1190002A17Rik	XM_130050	4.84326	0.00959373
Scl/Tal1 interrupting locus	Stil	NM_009185	4.83941	0.00616684
RIKEN cDNA 4933434I06 gene	4933434I06Rik	XM_283704	4.82357	0.0328906
echinoderm microtubule associated protein like 1	Eml1	XM_127139	4.82325	0.0110064
calcium channel, voltage-dependent, T type, alpha 1H subunit	Cacna1h	NM_021415	4.80586	0.003227
serine/threonine kinase 36 (fused homolog, Drosophila)	Stk36	NM_175031	4.80155	0.00249212
kinesin family member 27	Kif27	NM_175214	4.78393	0.0024694
kinase non-catalytic C-lobe domain (KIND) containing 1	Kndc1	XM_133920	4.75635	0.00972445
RIKEN cDNA 1700019L03 (c9orf117)	1700019L03Rik	XM_484987	4.75238	0.00569561
		XM_357326	4.73794	0.0022281
dynein, axonemal, heavy chain 8	Dnahc8	NM_013811	4.7114	0.00497144
transmembrane 4 superfamily member 1	Tm4sf1	NM_008536	4.70789	0.0128619
sialophorin	Spn	NM_009259	4.68928	0.00845267
radial spoke head 1 homolog (Chlamydomonas)	Rsph1	NM_025290	4.67614	0.0261659
lipoma HMGIC fusion partner-like 2	Lhfpl2	NM_172589	4.67402	0.036284
leucine rich repeat containing 48	Lrrc48	NM_029044	4.65751	0.0565789
UBX domain protein 10	Ubxn10	NM_178671	4.6266	0.00655746
glucocorticoid induced transcript 1	Glcci1	NM_133236	4.61429	0.014189
		NM_020609	4.59461	0.00889123
UBX domain protein 11	Ubxn11	NM_026257	4.56649	0.00515972
leucine rich repeat containing 67	Lrrc67	NM_027033	4.56418	0.00454204
breast carcinoma amplified sequence 1	Bcas1	NM_029815	4.56225	0.00562364
dynein, axonemal, heavy chain 9	Dnahc9	XM_110968	4.55496	0.00661823
EF-hand domain (C-terminal) containing 1	Efhc1	XM_129694	4.54162	0.0191532
coiled-coil domain containing 113	Ccdc113	NM_172914	4.53354	0.0290836
coiled-coil domain containing 41	Ccdc41	NM_029852	4.52708	0.00637422
kinesin family member 9	Kif9	NM_010628	4.52694	0.00497144
centrin 4	Cetn4	NM_145825	4.52141	0.00968608
oxysterol binding protein-like 6	Osbpl6	NM_145525	4.51469	0.00424387
		NM_177679	4.50894	0.00226213
cancer susceptibility candidate 1	Casc1	NM_177222	4.50862	0.0148789
		XM_484029	4.50801	0.122423
		XM_148428	4.46924	0.0119273
pre-B lymphocyte gene 3	Vpreb3	NM_009514	4.46351	0.00609936
zinc finger, MYND domain containing 10	Zmynd10	NM_053253	4.45128	0.0123456
aldehyde dehydrogenase 3 family, member B1	Aldh3b1	NM_026316	4.44611	0.0106809
Bardet-Biedl syndrome 9 (human)	Bbs9	NM_181316	4.43109	0.00536725
transmembrane protein 67	Tmem67	NM_177861	4.41443	0.00226213
fragile histidine triad gene	Fhit	NM_010210	4.39306	0.00434661
ribokinase	Rbks	NM_153196	4.39181	0.00562364
		XM_129927	4.38951	0.00226213
major facilitator superfamily domain containing 6-like	Mfsd6l	NM_146004	4.38541	0.00655746
dynein, axonemal, light intermediate polypeptide 1	Dnali1	NM_175223	4.37758	0.0062518
zinc finger protein 474	Zfp474	NM_025749	4.35996	0.0024694
potassium channel regulator	Kcnrg	NM_206974	4.35927	0.0174212
fibronectin type 3 and ankyrin repeat domains 1	Fank1	NM_025850	4.35652	0.00226213
polo-like kinase 4 (Drosophila)	Plk4	NM_011495	4.34856	0.00754749
dual-specificity tyrosine-(Y)-phosphorylation regulated kinase 3	Dyrk3	NM_145508	4.34618	0.00497144
RIKEN cDNA 1700026D08 gene	1700026D08Rik	NM_029335	4.34199	0.00898519
WD repeat domain 63	Wdr63	NM_172864	4.33011	0.00968608
coiled-coil domain containing 11	Ccdc11	XM_128864	4.32939	0.00569561
leucine rich repeat containing 48	Lrrc48	NM_029044	4.32577	0.0351707
coiled-coil domain containing 89	Ccdc89	XM_133591	4.32025	0.00497144
HEAT repeat containing 5A	Heatr5a	NM_177171	4.312	0.00569561
cyclin O	Ccno	XM_127523	4.30856	0.0367465
kinesin family member 27	Kif27	NM_175214	4.30811	0.003227
E2F transcription factor 7	E2f7	NM_178609	4.30679	0.00655746
hydrocephalus inducing	Hydin	NM_172916	4.29938	0.00404085
transmembrane protein 107	Tmem107	NM_028336	4.294	0.00226213
tetratricopeptide repeat domain 18	Ttc18	AK029536	4.2808	0.00772539
WD repeat domain 51A	Wdr51a	XM_135092	4.28057	0.00588193
outer dense fiber of sperm tails 3B	Odf3b	XM_128172	4.27544	0.0381128
testis-specific protein, Y-encoded-like 5	Tspyl5	XM_139378	4.27101	0.00497144
leucine rich repeat containing 18	Lrrc18	NM_026253	4.2667	0.00655746
tubulin polymerization-promoting protein family member 3	Tppp3	NM_026481	4.25271	0.0541698
RAB36, member RAS oncogene family	Rab36	XM_125709	4.23603	0.00660312
		NM_175281	4.22909	0.00955747
WD repeat domain 69	Wdr69	NM_027725	4.22851	0.00569561
		XM_132350	4.22787	0.0185426
coiled-coil domain containing 96	Ccdc96	NM_025725	4.22011	0.00582433
coiled-coil domain containing 151	Ccdc151	XM_134745	4.20665	0.0183978
		XM_128557	4.18875	0.00625017
ubiquitin specific peptidase 2	Usp2	NM_016808	4.18238	0.00569561
MORN repeat containing 5	Morn5	BC036965	4.17146	0.0366176
armadillo repeat containing 3	Armc3	XM_130012	4.15807	0.0185891
centrosomal protein 78	Cep78	NM_198019	4.15085	0.00972445
RIKEN cDNA 1700029J07 gene	1700029J07Rik	XM_134156	4.14655	0.0164701
RIKEN cDNA 4933404M02 gene	4933404M02Rik	NM_025744	4.14275	0.0430909
Bardet-Biedl syndrome 5 (human)	Bbs5	NM_028284	4.13634	0.00497144
leucine rich repeat containing 36	Lrrc36	XM_194421	4.12297	0.00249212
t-complex-associated testis expressed 3	Tcte3	NM_011560	4.11697	0.00637422
tubulin, alpha 1A	Tuba1a	NM_011653	4.11609	0.0464574
male germ cell-associated kinase	Mak	NM_008547	4.11317	0.0161691
leucine rich repeat containing 50	Lrrc50	NM_026648	4.10814	0.0425314
cyclin-dependent kinase-like 2 (CDC2-related kinase)	Cdkl2	NM_016912	4.09362	0.0118384
von Willebrand factor A domain containing 3A	Vwa3a	NM_177697	4.09291	0.003227
		XM_354690	4.09206	0.00249212
dyslexia susceptibility 1 candidate 1 homolog (human)	Dyx1c1	NM_026314	4.08189	0.00569561
sperm autoantigenic protein 17	Spa17	NM_011449	4.04631	0.00569561
proline rich region 18	Prr18	NM_178774	4.04186	0.0218302
		XM_354690	4.03953	0.00631355
		XM_485010	4.03476	0.00900182
RIKEN cDNA 9230110C19 gene	9230110C19Rik	NM_199017	4.02978	0.00631355
		XM_485969	4.02751	0.0319494
F-box protein 16	Fbxo16	NM_015795	4.02364	0.00249212
DnaJ (Hsp40) related, subfamily B, member 13	Dnajb13	NM_153527	4.02255	0.0229255
centrosomal protein 97	Cep97	NM_028815	4.01594	0.00723899
proviral integration site 2	Pim2	NM_138606	4.01445	0.00425181
DNA segment, Chr 15, Wayne State University 169, expressed	D15Wsu169e	NM_198420	4.01195	0.00655746
dimethylarginine dimethylaminohydrolase 1	Ddah1	NM_026993	4.00702	0.0169
		NM_199308	4.00493	0.00661823
RIKEN cDNA 5133400G04 gene	5133400G04Rik	NM_027733	3.9932	0.0062518
family with sequence similarity 154, member B	Fam154b	NM_177894	3.99005	0.0132391
RIKEN cDNA 1200014M14 gene	1200014M14Rik	NM_026173	3.98394	0.0360405
RIKEN cDNA 1110034A24 gene	1110034A24Rik	NM_027269	3.97742	0.00434661
Rho GTPase activating protein 11A	Arhgap11a	NM_181416	3.95114	0.0255971
		NM_178072	3.94598	0.0183296
cyclin-dependent kinase-like 2 (CDC2-related kinase)	Cdkl2	NM_016912	3.9331	0.00569561
EF hand calcium binding domain 1	Efcab1	NM_025769	3.93081	0.00279807
phospholipase C, eta 1	Plch1	NM_183191	3.92809	0.0122086
family with sequence similarity 167, member A	Fam167a	NM_177628	3.92433	0.00562364
cyclin-dependent kinase-like 1 (CDC2-related kinase)	Cdkl1	NM_183294	3.91901	0.00569561
t-complex protein 11	Tcp11	NM_013687	3.91317	0.035096
Rho GDP dissociation inhibitor (GDI) gamma	Arhgdig	NM_008113	3.90071	0.0105217
phosphatidylinositol-4-phosphate 5-kinase, type 1 beta	Pip5k1b	NM_008846	3.87912	0.00569561
RIKEN cDNA 1700024G13 gene	1700024G13Rik	XM_147820	3.87631	0.00497144
fibrinogen-like protein 1	Fgl1	NM_145594	3.87297	0.0245604
		NM_016793	3.8691	0.00535179
RIKEN cDNA 4932411E22 gene	4932411E22Rik	NM_172534	3.86746	0.0131338
RIKEN cDNA 5133400G04 gene	5133400G04Rik	NM_027733	3.86577	0.0308734
heat shock protein family B (small), member 11	Hspb11	XM_204090	3.85549	0.00689334
centrosomal protein 152	Cep152	XM_130551	3.8497	0.0102922
NIMA (never in mitosis gene a)-related expressed kinase 11	Nek11	NM_172461	3.84618	0.00249212
RIKEN cDNA A430083B19 gene	A430083B19Rik	NM_177624	3.8433	0.0108358
RIKEN cDNA 1700088E04 gene	1700088E04Rik	NM_138581	3.84062	0.0153233
RIKEN cDNA 1700010I14 gene	1700010I14Rik	NM_025851	3.83003	0.00562364
tetraspanin 2	Tspan2	NM_027533	3.82733	0.00249212
microrchidia 1	Morc1	NM_010816	3.82378	0.0223866
RIKEN cDNA 2010300C02 gene	2010300C02Rik	XM_129808	3.81295	0.0297816
family with sequence similarity 161, member B	Fam161b	NM_172581	3.80815	0.0206972
RIKEN cDNA 1700001C02 gene	1700001C02Rik	NM_029285	3.80512	0.0164274
tektin 2	Tekt2	NM_011902	3.80501	0.0451684
T-cell activation Rho GTPase-activating protein	Tagap	NM_145968	3.79765	0.00732759
RIKEN cDNA 1700054A03 gene	1700054A03Rik	XM_148917	3.79569	0.00497144
		NM_177372	3.79429	0.0164253
spermatogenesis associated glutamate (E)-rich protein 4d	Speer4d	NM_025759	3.79301	0.00438069
spermatogenesis associated 17	Spata17	NM_028848	3.79161	0.003227
proteasome (prosome, macropain) 26S subunit, ATPase 3, interacting protein	Psmc3ip	NM_008949	3.78164	0.0151023
RIKEN cDNA 4930452B06 gene	4930452B06Rik	NM_028934	3.78145	0.00569561
RIKEN cDNA 6430537H07 gene	6430537H07Rik	NM_178689	3.77959	0.00655746
RIKEN cDNA 6820408C15 gene	6820408C15Rik	NM_177656	3.77121	0.0269333
RUN domain containing 3B	Rundc3b	NM_198620	3.76874	0.0249775
serine/threonine/tyrosine interacting-like 1	Styxl1	NM_029659	3.76841	0.00993278
RIKEN cDNA 6330503K22 gene	6330503K22Rik	NM_182995	3.75899	0.0159754
		XM_129366	3.74799	0.00626946
RIKEN cDNA 9530077C05 gene	9530077C05Rik	NM_026739	3.74518	0.008875
RIKEN cDNA 1700086L19 gene	1700086L19Rik	XM_358420	3.74344	0.00562364
WAP four-disulfide core domain 3	Wfdc3	XM_355365	3.73168	0.0114034
centrosomal protein 135	Cep135	NM_199032	3.73153	0.0207762
WD repeat domain 16	Wdr16	NM_027963	3.72865	0.067372
histone cluster 2, H2aa1	Hist2h2aa1	NM_013549	3.72427	0.0121538
acyl-Coenzyme A oxidase 2, branched chain	Acox2	NM_053115	3.72038	0.0372203
cytoskeleton associated protein 2-like	Ckap2l	NM_181589	3.72037	0.0122741
centrosomal protein 120	Cep120	NM_178686	3.72006	0.008875
		XM_486542	3.71343	0.00635863
chemokine-like factor	Cklf	NM_029295	3.71258	0.0318293
potassium large conductance calcium-activated channel, subfamily M, beta member 2	Kcnmb2	NM_028231	3.70779	0.0349183
MORN repeat containing 1	Morn1	XM_131829	3.69716	0.00657603
leucine-rich and death domain containing	Lrdd	NM_022654	3.69304	0.00609345
chemokine (C-X-C motif) receptor 4	Cxcr4	NM_009911	3.68849	0.0324277
sperm associated antigen 5	Spag5	NM_017407	3.68758	0.0121538
zinc finger protein 423	Zfp423	NM_033327	3.68518	0.00661823
centromere protein J	Cenpj	XM_127861	3.68431	0.00744383
MORN repeat containing 5	Morn5	XM_130188	3.6788	0.0378587
		NM_175515	3.67574	0.00616684
		NM_176897	3.66505	0.00626946
dynein, axonemal, intermediate chain 1	Dnaic1	NM_175138	3.6618	0.0102134
intraflagellar transport 81 homolog (Chlamydomonas)	Ift81	NM_009879	3.65669	0.00616684
		XM_484992	3.65547	0.00661823
tectonic family member 3	Tctn3	NM_026260	3.65281	0.00569561
dysbindin (dystrobrevin binding protein 1) domain containing 1	Dbndd1	NM_028146	3.65196	0.0102617
ninein	Nin	NM_008697	3.65147	0.0108358
solute carrier family 27 (fatty acid transporter), member 2	Slc27a2	NM_011978	3.64875	0.00754749
sorbin and SH3 domain containing 1	Sorbs1	NM_009166	3.64794	0.00655746
RIKEN cDNA 4930579J09 gene	4930579J09Rik	NM_133689	3.64378	0.0507617
		NM_178118	3.64031	0.036284
transcription elongation factor A (SII), 3	Tcea3	NM_011542	3.63581	0.0062859
Ras-related GTP binding D	Rragd	NM_027491	3.63279	0.00497144
acylphosphatase 1, erythrocyte (common) type	Acyp1	NM_025421	3.63191	0.00569561
testis specific gene A14	Tsga14	NM_031998	3.62849	0.0123456
coiled-coil domain containing 14	Ccdc14	NM_172824	3.62728	0.0180413
coiled-coil domain containing 114	Ccdc114	XM_133435	3.62377	0.00661823
yippee-like 1 (Drosophila)	Ypel1	NM_023249	3.61858	0.00760332
		NM_027860	3.61729	0.0111699
DNA segment, human D4S114	D0H4S114	NM_053078	3.6163	0.0231902
centrosomal protein 76	Cep76	XM_129027	3.61415	0.008875
family with sequence similarity 118, member A	Fam118a	NM_133750	3.61246	0.0105217
tubulin tyrosine ligase-like family, member 6	Ttll6	NM_172799	3.60912	0.00996944
DENN/MADD domain containing 5B	Dennd5b	NM_177192	3.60661	0.00681069
tetraspanin 2	Tspan2	NM_027533	3.6054	0.011255
renal tumor antigen	Rage	NM_011973	3.60487	0.0123456
growth factor receptor bound protein 14	Grb14	NM_016719	3.5961	0.00655746
spire homolog 1 (Drosophila)	Spire1	NM_176832	3.59322	0.0461118
dual specificity phosphatase 18	Dusp18	NM_173745	3.58951	0.00661823
acyl-CoA thioesterase 1	Acot1	NM_012006	3.58884	0.00749463
Bardet-Biedl syndrome 7 (human)	Bbs7	NM_027810	3.5868	0.00569561
		NM_177336	3.58651	0.0279313
immunoglobulin superfamily, member 11	Igsf11	NM_170599	3.57949	0.0138532
paraneoplastic antigen MA1	Pnma1	XM_127024	3.57932	0.0112191
RuvB-like protein 1	Ruvbl1	NM_019685	3.57503	0.0134875
coiled-coil domain containing 65	Ccdc65	NM_153518	3.5733	0.0108358
RIKEN cDNA 1700040L02 gene	1700040L02Rik	NM_028491	3.57172	0.0113096
cytohesin 1 interacting protein	Cytip	NM_139200	3.56741	0.0609169
serine/threonine kinase 33	Stk33	XM_358897	3.5591	0.0107247
interferon regulatory factor 8	Irf8	NM_008320	3.55822	0.008875
leucine rich repeat containing 23	Lrrc23	NM_013588	3.55667	0.104398
ankyrin repeat domain 42	Ankrd42	NM_028665	3.5533	0.0214427
tetratricopeptide repeat domain 26	Ttc26	NM_153600	3.55184	0.00582312
		XM_484925	3.55074	0.0240522
ectonucleotide pyrophosphatase/phosphodiesterase 4	Enpp4	NM_199016	3.54925	0.0153001
N-acetylglutamate synthase	Nags	NM_178053	3.54357	0.0159754
sperm associated antigen 1	Spag1	NM_012031	3.52814	0.00786207
nephronophthisis 4 (juvenile) homolog (human)	Nphp4	NM_153424	3.52772	0.0250164
Rho GTPase activating protein 11A	Arhgap11a	NM_181416	3.52327	0.00959373
cadherin-like 26	Cdh26	NM_198656	3.51927	0.00664735
AN1, ubiquitin-like, homolog (Xenopus laevis)	Anubl1	XM_132758	3.51898	0.00661823
DAZ interacting protein 1-like	Dzip1l	NM_028258	3.51586	0.00655746
EF hand calcium binding domain 1	Efcab1	NM_025769	3.51116	0.0102401
kelch domain containing 9	Klhdc9	AK076812	3.50511	0.00770571
ninein	Nin	NM_008697	3.50385	0.0114233
EF hand domain containing 1	Efhd1	NM_028889	3.49694	0.0426362
saccharopine dehydrogenase (putative)	Sccpdh	NM_178653	3.49566	0.0132763
		XM_112192	3.48949	0.00655746
cell adhesion molecule 1	Cadm1	NM_018770	3.48799	0.0152647
MYCBP associated protein	Mycbpap	NM_170671	3.48431	0.0116678
RIKEN cDNA 1500015O10 gene	1500015O10Rik	NM_024283	3.47388	0.0191532
forkhead box J1	Foxj1	NM_008240	3.47099	0.033385
		NM_177679	3.46959	0.0108358
protein tyrosine phosphatase-like (proline instead of catalytic arginine), member a	Ptpla	NM_013935	3.46906	0.0148789
transmembrane protein 107	Tmem107	NM_025838	3.46851	0.00791613
dimethylarginine dimethylaminohydrolase 1	Ddah1	NM_026993	3.46812	0.150896
radical S-adenosyl methionine domain containing 2	Rsad2	NM_021384	3.45859	0.035146
spindle assembly 6 homolog (C. elegans)	Sass6	XM_131155	3.45564	0.0108674
		XM_132615	3.45522	0.0635194
serine peptidase inhibitor, Kazal type 2	Spink2	NM_183284	3.44711	0.00711354
non-protein coding RNA 166	Ncrna00166	NM_025506	3.44545	0.0986909
		XM_147046	3.4451	0.0118216
intraflagellar transport 122 homolog (Chlamydomonas)	Ift122	NM_031177	3.44083	0.00951808
F-box protein 36	Fbxo36	NM_025386	3.43725	0.0446711
outer dense fiber of sperm tails 3B	Odf3b	AK008010	3.43436	0.0559008
RIKEN cDNA E030019B06 gene	E030019B06Rik	XM_133957	3.4338	0.0162182
coiled-coil domain containing 15	Ccdc15	XM_146705	3.43354	0.00730308
chibby homolog 1 (Drosophila)	Cby1	NM_028634	3.43315	0.0185426
spermatid perinuclear RNA binding protein	Strbp	NM_176932	3.43188	0.0108358
		NM_177119	3.42058	0.00562364
kit oncogene	Kit	NM_021099	3.40481	0.0152745
RNA binding motif protein 20	Rbm20	XM_140742	3.39944	0.0400361
dual specificity phosphatase 18	Dusp18	NM_173745	3.39483	0.0118216
RIKEN cDNA 1700025K23 gene	1700025K23Rik	NM_183254	3.39342	0.0344052
RIKEN cDNA 1110049B09 gene	1110049B09Rik	XM_126902	3.3929	0.0201026
		XM_483921	3.3902	0.0466047
intraflagellar transport 74 homolog (Chlamydomonas)	Ift74	NM_026319	3.38542	0.0185891
RIKEN cDNA E130303B06 gene	E130303B06Rik	NM_198299	3.38179	0.0171783
D-aspartate oxidase	Ddo	NM_027442	3.36676	0.00996944
leucine rich repeat containing 48	Lrrc48	NM_029044	3.36356	0.013931
thioredoxin domain containing 6	Txndc6	XM_135038	3.34891	0.208345
ubiquitin specific peptidase 11	Usp11	NM_145628	3.34786	0.00696899
kinesin family member 3A	Kif3a	NM_008443	3.34332	0.00685923
coiled-coil-helix-coiled-coil-helix domain containing 6	Chchd6	NM_025351	3.34271	0.0124324
leucine rich repeat containing 67	Lrrc67	NM_145692	3.33623	0.0121538
RIKEN cDNA 1700023L04 gene	1700023L04Rik	XM_485737	3.33592	0.0148789
ubiquitin-conjugating enzyme E2T (putative)	Ube2t	NM_026024	3.33523	0.0344052
NIMA (never in mitosis gene a)-related expressed kinase 5	Nek5	NM_177898	3.33173	0.0961925
polymerase (DNA directed), gamma 2, accessory subunit	Polg2	NM_015810	3.3233	0.00744383
family with sequence similarity 81, member A	Fam81a	XM_135000	3.32314	0.0128619
sperm flagellar 1	Spef1	XM_357260	3.31968	0.0567325
meiosis expressed gene 1	Meig1	NM_008579	3.31008	0.275367
oxysterol binding protein-like 6	Osbpl6	NM_145525	3.30997	0.0193558
Alstrom syndrome 1 homolog (human)	Alms1	NM_145223	3.30717	0.0111699
cytochrome c oxidase subunit VIIb	Cox7b	NM_025379	3.30633	0.0391815
dynein light chain roadblock-type 2	Dynlrb2	NM_029297	3.30237	0.197343
coiled-coil domain containing 87	Ccdc87	NM_207268	3.30011	0.0105217
urate oxidase	Uox	NM_009474	3.29999	0.0113793
coiled-coil and C2 domain containing 2A	Cc2d2a	NM_172274	3.29922	0.00770571
homeodomain interacting protein kinase 1	Hipk1	NM_010432	3.29857	0.0105217
tektin 4	Tekt4	XM_128462	3.29182	0.0499412
T-cell activation GTPase activating protein 1	Tagap1	NM_147155	3.29024	0.00800667
		NM_145549	3.28688	0.00972445
		NM_133751	3.28623	0.00723899
RIKEN cDNA 4430402I18 gene	4430402I18Rik	NM_198651	3.2847	0.0164253
dynein cytoplasmic 2 light intermediate chain 1	Dync2li1	NM_172256	3.27952	0.0125684
Rho GTPase activating protein 18	Arhgap18	NM_176837	3.27761	0.0117413
family with sequence similarity 179, member A	Fam179a	NM_177087	3.27672	0.0306869
Rab interacting lysosomal protein-like 2	Rilpl2	NM_030259	3.27557	0.016946
complement component 8, gamma polypeptide	C8g	XM_130127	3.27305	0.0121994
RIKEN cDNA 4930455F23 gene	4930455F23Rik	NM_029115	3.27286	0.0645866
leucine rich repeat containing 56	Lrrc56	NM_153777	3.26948	0.0118694
coiled-coil domain containing 40	Ccdc40	NM_175430	3.26622	0.00750675
		NM_173775	3.2652	0.0102401
histidine decarboxylase	Hdc	NM_008230	3.26045	0.115753
six transmembrane epithelial antigen of the prostate 1	Steap1	NM_027399	3.25797	0.0279313
forkhead box N4	Foxn4	NM_148935	3.25659	0.0405737
c-myc binding protein	Mycbp	NM_019660	3.25587	0.00631355
PX domain containing serine/threonine kinase	Pxk	NM_145458	3.25184	0.0186436
PARK2 co-regulated	Pacrg	XM_128418	3.22954	0.0190286
		NM_133236	3.22734	0.030822
inter-alpha trypsin inhibitor, heavy chain 2	Itih2	NM_010582	3.2271	0.0147473
mitogen-activated protein kinase 15	Mapk15	NM_177922	3.22247	0.00889123
growth arrest specific 8	Gas8	NM_018855	3.222	0.0113793
RIKEN cDNA D430041B17 gene	D430041B17Rik	NM_172737	3.22134	0.00580259
ankyrin repeat domain 13 family, member D	Ankrd13d	NM_026720	3.22091	0.00655746
CDC28 protein kinase regulatory subunit 2	Cks2	NM_025415	3.22081	0.0161691
		NM_010841	3.21663	0.0120149
cold shock domain containing C2, RNA binding	Csdc2	NM_145473	3.21242	0.0113793
Tctex1 domain containing 4	Tctex1d4	NM_175030	3.19715	0.0306048
ankyrin repeat domain 54	Ankrd54	NM_144849	3.19706	0.00996944
Tctex1 domain containing 2	Tctex1d2	NM_025329	3.1952	0.0233334
RIKEN cDNA 5330431N19 gene	5330431N19Rik	NM_172639	3.19519	0.0394374
		NM_207228	3.19417	0.0111699
expressed sequence AI894139	AI894139	NM_178898	3.19103	0.0123432
		NM_213614	3.18232	0.0131338
NIMA (never in mitosis gene a)-related expressed kinase 3	Nek3	NM_011848	3.17964	0.00889123
cortexin 1	Ctxn1	NM_183315	3.17867	0.0389564
homeodomain interacting protein kinase 3	Hipk3	NM_010434	3.17518	0.00898519
fibrous sheath-interacting protein 1	Fsip1	NM_027759	3.17439	0.0102134
coiled-coil domain containing 67	Ccdc67	NM_181816	3.16908	0.168484
coiled-coil domain containing 45	Ccdc45	NM_177088	3.16496	0.00804479
non-metastatic cells 5, protein expressed in (nucleoside-diphosphate kinase)	Nme5	NM_080637	3.16317	0.157364
small EDRK-rich factor 1	Serf1	NM_011353	3.16249	0.0113793
leucine rich repeat containing 23	Lrrc23	NM_013588	3.1621	0.123341
EF-hand domain (C-terminal) containing 2	Efhc2	XM_135814	3.1618	0.0530652
EF hand domain family, member B	Efhb	NM_172497	3.15525	0.008875
coiled-coil domain containing 150	Ccdc150	XM_129746	3.15413	0.00777849
RIKEN cDNA 4931429I11 gene	4931429I11Rik	AK016487	3.15405	0.0458353
bicaudal C homolog 1 (Drosophila)	Bicc1	NM_031397	3.15069	0.154281
intraflagellar transport 57 homolog (Chlamydomonas)	Ift57	NM_028680	3.14871	0.0557562
ubiquitin specific peptidase 18	Usp18	NM_011909	3.14788	0.00631355
pericentriolar material 1	Pcm1	NM_023662	3.14317	0.0349183
serine (or cysteine) peptidase inhibitor, clade A (alpha-1 antiproteinase, antitrypsin), member 9	Serpina9	NM_027997	3.14211	0.037082
RIKEN cDNA 2700049A03 gene	2700049A03Rik	XM_126944	3.14093	0.0105217
C2 calcium-dependent domain containing 2-like	C2cd2l	XM_134795	3.13657	0.0189863
leucine rich repeat containing 49	Lrrc49	NM_145616	3.13308	0.0287066
transmembrane channel-like gene family 5	Tmc5	NM_028930	3.13265	0.0324977
dynein, axonemal, intermediate chain 1	Dnaic1	NM_175138	3.12905	0.065272
forkhead box A2	Foxa2	NM_010446	3.12427	0.0486083
WD repeat domain 60	Wdr60	NM_146039	3.11813	0.0185426
serine/threonine/tyrosine interacting-like 1	Styxl1	NM_029659	3.11671	0.0245604
special AT-rich sequence binding protein 1	Satb1	NM_009122	3.11588	0.0153001
ADP-ribosylation factor-like 6	Arl6	NM_019665	3.11347	0.0174386
zinc finger protein 819	Zfp819	NM_028913	3.11146	0.0299625
histone cluster 2, H2aa2	Hist2h2aa2	NM_178212	3.11132	0.0119578
WD repeat domain 54	Wdr54	NM_023790	3.10837	0.0192687
sema domain, immunoglobulin domain (Ig), short basic domain, secreted, (semaphorin) 3E	Sema3e	NM_011348	3.10813	0.0507617
regulatory factor X, 2 (influences HLA class II expression)	Rfx2	NM_009056	3.10741	0.0108358
transmembrane protein 56	Tmem56	NM_178936	3.10666	0.0102401
endothelial cell-specific molecule 1	Esm1	NM_023612	3.10663	0.107228
surfactant associated protein C	Sftpc	NM_011359	3.10487	0.0346028
ring finger protein 32	Rnf32	NM_021470	3.10016	0.0220612
cDNA sequence BC029214	BC029214	NM_153557	3.09425	0.0102922
B-cell translocation gene 4	Btg4	NM_019493	3.09284	0.00996944
protein phosphatase 1, regulatory (inhibitor) subunit 14D	Ppp1r14d	NM_028104	3.09146	0.00996944
Notch gene homolog 4 (Drosophila)	Notch4	NM_010929	3.08702	0.0408594
protein tyrosine phosphatase-like (proline instead of catalytic arginine), member a	Ptpla	NM_013935	3.08272	0.0423436
		AK042735	3.08115	0.0705788
dynein cytoplasmic 2 light intermediate chain 1	Dync2li1	NM_172256	3.07917	0.0110064
RIKEN cDNA 6330403K07 gene	6330403K07Rik	NM_134022	3.07343	0.0405737
RIKEN cDNA 2310044G17 gene	2310044G17Rik	NM_173735	3.07173	0.01878
intraflagellar transport 81 homolog (Chlamydomonas)	Ift81	NM_009879	3.06987	0.036284
NADPH oxidase activator 1	Noxa1	NM_172204	3.06666	0.0164365
Rho GTPase activating protein 11A	Arhgap11a	NM_181416	3.06536	0.0546746
glycoprotein hormones, alpha subunit	Cga	NM_009889	3.06444	0.0352178
deiodinase, iodothyronine, type I	Dio1	NM_007860	3.06233	0.0203369
riboflavin kinase	Rfk	NM_019437	3.05985	0.0384841
		XM_488563	3.05821	0.0128619
RIKEN cDNA 1810007P19 gene	1810007P19Rik	NM_172701	3.05526	0.0736733
RIKEN cDNA 5730419I09 gene	5730419I09Rik	NM_029081	3.04811	0.0164701
inositol 1,4,5-trisphosphate 3-kinase A	Itpka	NM_146125	3.04788	0.0464628
cDNA sequence BC031353	BC031353	NM_153584	3.04755	0.0229028
RIKEN cDNA 2310007L24 gene	2310007L24Rik	XM_126508	3.04094	0.0355804
tektin 1	Tekt1	NM_011569	3.04087	0.158647
		NM_207529	3.04042	0.0312322
RAB, member of RAS oncogene family-like 5	Rabl5	NM_026073	3.03746	0.016274
tubulin tyrosine ligase-like family, member 9	Ttll9	NM_029064	3.03639	0.0147488
male germ cell-associated kinase	Mak	NM_008547	3.03377	0.00660312
t-complex-associated testis expressed 3	Tcte3	NM_011560	3.03181	0.0339172
a disintegrin and metallopeptidase domain 5	Adam5	NM_007401	3.03163	0.0062518
RIKEN cDNA B230396O12 gene	B230396O12Rik	NM_172878	3.03113	0.00696001
crystallin, alpha A	Cryaa	NM_013501	3.02823	0.00655746
		NM_023517	3.0229	0.0599717
doublesex and mab-3 related transcription factor 3	Dmrt3	NM_177360	3.02285	0.0408032
ligand dependent nuclear receptor corepressor-like	Lcorl	NM_172153	3.0215	0.0300759
RIKEN cDNA 4930560E09 gene	4930560E09Rik	XM_283466	3.01673	0.00711354
cDNA sequence BC046331	BC046331	NM_177673	3.01594	0.0123456
heat shock factor 2	Hsf2	NM_008297	3.01444	0.0164701
retinol binding protein 4, plasma	Rbp4	NM_011255	3.00635	0.0171555
OTU domain containing 4	Otud4	AK122429	3.00368	0.0245926
adenylate kinase 1	Ak1	NM_021515	3.00196	0.024425
non-metastatic cells 7, protein expressed in (nucleoside-diphosphate kinase)	Nme7	NM_138314	2.99895	0.035096
RIKEN cDNA 2210020M01 gene	2210020M01Rik	NM_183259	2.99894	0.0547281
rotatin	Rttn	NM_175542	2.99748	0.0176174
intraflagellar transport 172 homolog (Chlamydomonas)	Ift172	NM_026298	2.99706	0.136696
sirtuin 3 (silent mating type information regulation 2, homolog) 3 (S. cerevisiae)	Sirt3	NM_022433	2.99436	0.00965382
putative homeodomain transcription factor 1	Phtf1	NM_013629	2.99396	0.0261763
RIKEN cDNA E230019M04 gene	E230019M04Rik	NM_177921	2.9926	0.0164189
		XM_484173	2.99121	0.0124507
coiled-coil domain containing 92	Ccdc92	NM_144819	2.99039	0.015018
RIKEN cDNA 1500031L02 gene	1500031L02Rik	NM_025892	2.98974	0.0287066
cytoskeleton associated protein 2-like	Ckap2l	NM_181589	2.98674	0.0509822
		XM_130125	2.98246	0.138995
tubby-like protein 2	Tulp2	NM_008807	2.98222	0.0288289
outer dense fiber of sperm tails 2-like	Odf2l	NM_025714	2.97856	0.0164189
dual specificity phosphatase 14	Dusp14	NM_019819	2.97814	0.0525696
		XM_129771	2.977	0.0121538
Rho GTPase activating protein 11A	Arhgap11a	NM_181416	2.97668	0.0969718
glycerol-3-phosphate dehydrogenase 1 (soluble)	Gpd1	NM_010271	2.97605	0.0320496
transmembrane protein 138	Tmem138	NM_028411	2.97585	0.0308734
CDP-diacylglycerol synthase 1	Cds1	NM_173370	2.97126	0.15636
solute carrier family 9 (sodium/hydrogen exchanger), member 3 regulator 1	Slc9a3r1	NM_012030	2.97001	0.030038
iodotyrosine deiodinase	Iyd	NM_027391	2.96952	0.0123432
family with sequence similarity 82, member B	Fam82b	NM_025476	2.96796	0.023887
		NM_178387	2.96587	0.0190406
lectin, galactoside-binding, soluble, 3 binding protein	Lgals3bp	NM_011150	2.95974	0.0275759
pleckstrin	Plek	NM_019549	2.95145	0.341891
protein phosphatase 1, regulatory (inhibitor) subunit 14c	Ppp1r14c	NM_133485	2.94719	0.0569977
centrosomal protein 55	Cep55	NM_028760	2.94713	0.0439848
excision repair cross-complementing rodent repair deficiency complementation group 6 - like	Ercc6l	NM_146235	2.94636	0.116754
coagulation factor II	F2	NM_010168	2.94617	0.0222236
8-oxoguanine DNA-glycosylase 1	Ogg1	NM_010957	2.9457	0.00991767
kinesin family member 5C	Kif5c	NM_008449	2.94237	0.0462169
RIKEN cDNA 4933439C20 gene	4933439C20Rik	AK005333	2.94075	0.0456148
RIKEN cDNA 4921536K21 gene	4921536K21Rik	NM_026150	2.94065	0.0164701
coiled-coil domain containing 33	Ccdc33	NM_029212	2.93643	0.0191578
calreticulin 3	Calr3	NM_028500	2.93443	0.0161284
abhydrolase domain containing 3	Abhd3	NM_134130	2.93345	0.0104693
Rho-guanine nucleotide exchange factor	Rgnef	NM_012026	2.9319	0.00845267
fatty acid amide hydrolase	Faah	NM_010173	2.93176	0.0140393
IQ motif containing H	Iqch	XM_134960	2.93143	0.0105266
EF hand domain containing 1	Efhd1	NM_028889	2.92381	0.0110064
tryptophan rich basic protein	Wrb	NM_207301	2.92254	0.0152745
echinoderm microtubule associated protein like 2	Eml2	XM_133217	2.92205	0.0164249
intraflagellar transport 57 homolog (Chlamydomonas)	Ift57	NM_028680	2.92193	0.0227482
		XM_130136	2.91331	0.0246973
centrobin, centrosomal BRCA2 interacting protein	Cntrob	NM_172560	2.91186	0.0988285
homeodomain interacting protein kinase 1	Hipk1	AF071071	2.91149	0.0277162
MORN repeat containing 4	Morn4	NM_198108	2.9111	0.0261867
microtubule-associated protein 1B	Mtap1b	NM_008634	2.90802	0.158129
		NM_144840	2.90775	0.0320606
adaptor-related protein complex 3, mu 2 subunit	Ap3m2	NM_029505	2.90476	0.0319494
RAB11 family interacting protein 4 (class II)	Rab11fip4	NM_175543	2.90352	0.00972445
oxysterol binding protein-like 3	Osbpl3	NM_027881	2.90143	0.0245461
		XM_130326	2.90036	0.0162954
transformed mouse 3T3 cell double minute 1	Mdm1	NM_148922	2.89815	0.0118302
expressed sequence AV249152	AV249152	NM_145425	2.89621	0.0599717
lactate dehydrogenase C	Ldhc	NM_013580	2.89497	0.0107434
ATP-binding cassette, sub-family B (MDR/TAP), member 6	Abcb6	NM_023732	2.89233	0.0312322
IQ motif containing E	Iqce	NM_028833	2.89093	0.0149669
coiled-coil domain containing 92	Ccdc92	NM_144819	2.88914	0.0202605
RIKEN cDNA 4930562D19 gene	4930562D19Rik	NM_177616	2.88399	0.0355311
family with sequence similarity 13, member A	Fam13a	NM_153574	2.88082	0.0186436
amyotrophic lateral sclerosis 2 (juvenile) chromosome region, candidate 12 (human)	Als2cr12	NM_175370	2.87538	0.0372855
t-complex 11 (mouse) like 2	Tcp11l2	NM_146008	2.87354	0.0347784
zinc finger, B-box domain containing	Zbbx	NM_172515	2.87326	0.0530652
serologically defined colon cancer antigen 8	Sdccag8	NM_029756	2.87233	0.0218085
family with sequence similarity 122, member A	Fam122a	NM_026520	2.87092	0.0333543
		XM_204259	2.86878	0.00959373
transformed mouse 3T3 cell double minute 1	Mdm1	NM_148922	2.86858	0.0491815
PAS domain containing serine/threonine kinase	Pask	NM_080850	2.86663	0.0252209
RAB, member of RAS oncogene family-like 2A	Rabl2a	NM_026817	2.86135	0.0554135
trichoplein, keratin filament binding	Tchp	NM_029992	2.86103	0.0151023
double C2, beta	Doc2b	NM_007873	2.85802	0.0144821
potassium channel, subfamily K, member 12	Kcnk12	NM_199251	2.85475	0.0131338
FK506 binding protein 5	Fkbp5	NM_010220	2.85418	0.102918
Fgfr1 oncogene partner	Fgfr1op	NM_201230	2.85326	0.0246973
spermatogenesis associated 6	Spata6	NM_026470	2.85237	0.016946
		XM_484644	2.85182	0.0127235
		NM_177287	2.8494	0.0632867
kinesin family member 3A	Kif3a	NM_008443	2.84657	0.0267038
cadherin 11	Cdh11	NM_009866	2.84064	0.434717
RIKEN cDNA 4930534B04 gene	4930534B04Rik	NM_181815	2.83992	0.0162827
		NM_178062	2.83747	0.0245604
cyclin-dependent kinase-like 2 (CDC2-related kinase)	Cdkl2	NM_177270	2.83468	0.111248
DnaJ (Hsp40) homolog, subfamily C, member 16	Dnajc16	NM_172338	2.83382	0.0286645
RIKEN cDNA 6330514A18 gene	6330514A18Rik	NM_183152	2.8336	0.0404604
PC4 and SFRS1 interacting protein 1	Psip1	NM_133948	2.83321	0.0261867
glycosyltransferase 8 domain containing 4	Glt8d4	NM_198612	2.82924	0.143337
mitochondrial intermediate peptidase	Mipep	NM_027436	2.82804	0.0843638
DBF4 homolog (S. cerevisiae)	Dbf4	NM_013726	2.82799	0.0613376
cDNA sequence BC060267	BC060267	NM_198603	2.82642	0.061195
		XM_489138	2.82533	0.0378587
intraflagellar transport 80 homolog (Chlamydomonas)	Ift80	NM_026641	2.81909	0.046979
RIKEN cDNA 2410089E03 gene	2410089E03Rik	XM_127911	2.81869	0.0406605
RIKEN cDNA 4733401H18 gene	4733401H18Rik	NM_023247	2.81726	0.0418351
heat shock protein 90, alpha (cytosolic), class A member 1	Hsp90aa1	NM_010480	2.8157	0.141421
radial spoke head 10 homolog B (Chlamydomonas)	Rsph10b2	XM_205565	2.81566	0.0153001
RuvB-like protein 1	Ruvbl1	NM_019685	2.81361	0.0189288
PARK2 co-regulated-like	Pacrgl	NM_025755	2.80812	0.0324147
coiled-coil domain containing 34	Ccdc34	NM_026613	2.80778	0.036284
cancer susceptibility candidate 4	Casc4	NM_177054	2.80668	0.0312322
RIKEN cDNA 1700003M02 gene	1700003M02Rik	NM_027041	2.80662	0.153434
Bardet-Biedl syndrome 4 (human)	Bbs4	NM_175325	2.80572	0.0147473
OTU domain, ubiquitin aldehyde binding 2	Otub2	NM_026580	2.80432	0.0609133
dihydrodiol dehydrogenase (dimeric)	Dhdh	NM_027903	2.8033	0.041988
nephronophthisis 1 (juvenile) homolog (human)	Nphp1	NM_016902	2.8026	0.0263858
RIKEN cDNA D830044I16 gene	D830044I16Rik	XM_358678	2.79977	0.0245604
huntingtin-associated protein 1	Hap1	NM_010404	2.79974	0.0287066
WD repeat domain 35	Wdr35	NM_172470	2.79695	0.0415625
TRIO and F-actin binding protein	Triobp	NM_138579	2.79437	0.0602604
ankyrin repeat domain 32	Ankrd32	NM_134071	2.79407	0.0202758
zinc finger protein 41	Zfp41	NM_011759	2.79353	0.024775
RAB, member of RAS oncogene family-like 4	Rabl4	NM_025931	2.79294	0.0351707
myo-inositol 1-phosphate synthase A1	Isyna1	NM_023627	2.78949	0.0525086
leucine rich repeat containing 46	Lrrc46	NM_027026	2.78889	0.276285
		NM_011158	2.78801	0.0312322
cerebellar degeneration-related 2	Cdr2	NM_007672	2.78762	0.075037
family with sequence similarity 134, member B	Fam134b	NM_025459	2.78751	0.0318005
interferon gamma inducible protein 47	Ifi47	NM_008330	2.78406	0.0404604
tetratricopeptide repeat domain 29	Ttc29	NM_183096	2.78338	0.0718511
chibby homolog 1 (Drosophila)	Cby1	NM_028634	2.78277	0.0334328
		XM_484765	2.7803	0.0310205
leishmanolysin-like (metallopeptidase M8 family)	Lmln	NM_172823	2.77991	0.0346028
general transcription factor IIA, 1-like	Gtf2a1l	NM_023630	2.77795	0.0254443
RAB, member of RAS oncogene family-like 4	Rabl4	NM_025931	2.77674	0.0268223
ribosomal protein S6 kinase, polypeptide 2	Rps6ka2	NM_011299	2.77651	0.0565328
RIKEN cDNA 4933427D14 gene	4933427D14Rik	NM_028963	2.77501	0.0202605
coiled-coil domain containing 19	Ccdc19	XM_355284	2.77072	0.329826
histone cluster 1, H2bc	Hist1h2bc	NM_023422	2.77041	0.0367091
RIKEN cDNA 2410004P03 gene	2410004P03Rik	XM_126830	2.76903	0.0179815
mediator of RNA polymerase II transcription, subunit 25 homolog (yeast)	Med25	NM_029365	2.76254	0.0261918
zinc finger, BED domain containing 4	Zbed4	NM_181412	2.75705	0.036284
nudix (nucleoside diphosphate linked moiety X)-type motif 11	Nudt11	NM_021431	2.75689	0.0311469
		NM_027860	2.75507	0.0566366
histone cluster 1, H3d	Hist1h3d	NM_178204	2.7535	0.0364521
solute carrier family 7 (cationic amino acid transporter, y+ system), member 3	Slc7a3	NM_007515	2.75147	0.241741
general transcription factor IIIC, polypeptide 4	Gtf3c4	NM_172977	2.7492	0.0675115
secernin 2	Scrn2	NM_146027	2.74775	0.0229255
GIPC PDZ domain containing family, member 2	Gipc2	NM_016867	2.74743	0.177869
sirtuin 3 (silent mating type information regulation 2, homolog) 3 (S. cerevisiae)	Sirt3	NM_022433	2.74624	0.0936192
RIKEN cDNA 4932417I16 gene	4932417I16Rik	XM_134593	2.74569	0.0149669
Y box protein 2	Ybx2	NM_016875	2.74402	0.0455212
		NM_025640	2.74347	0.0245604
glucokinase	Gck	NM_010292	2.74131	0.0323733
serine/threonine kinase 32A	Stk32a	NM_178749	2.7385	0.0297281
lysophosphatidylglycerol acyltransferase 1	Lpgat1	NM_172266	2.7385	0.0225431
centrosomal protein 63	Cep63	AK076549	2.7313	0.0213497
		XM_485409	2.72986	0.0245604
heat shock protein 2	Hspa2	NM_001002012	2.72977	0.220873
CD82 antigen	Cd82	NM_007656	2.7293	0.0265442
Tnf receptor-associated factor 5	Traf5	NM_011633	2.72093	0.0355311
coiled-coil domain containing 104	Ccdc104	NM_025740	2.72035	0.0186436
arsenic (+3 oxidation state) methyltransferase	As3mt	NM_020577	2.71978	0.104279
5,10-methylenetetrahydrofolate reductase	Mthfr	NM_010840	2.71836	0.0351707
		NM_027507	2.71557	0.055209
coiled-coil domain containing 103	Ccdc103	XM_126497	2.71519	0.0461118
biphenyl hydrolase-like (serine hydrolase, breast epithelial mucin-associated antigen)	Bphl	NM_026512	2.71493	0.177734
mitogen-activated protein kinase binding protein 1	Mapkbp1	NM_011941	2.71444	0.0569611
NEDD4 binding protein 2	N4bp2	XM_290115	2.71342	0.0456148
tubulin tyrosine ligase-like family, member 3	Ttll3	NM_133923	2.7107	0.0606917
Rpgrip1-like	Rpgrip1l	NM_173431	2.70939	0.0164189
S100P binding protein	S100pbp	XM_131689	2.70798	0.0344052
lysophosphatidic acid receptor 3	Lpar3	NM_022983	2.70793	0.0255971
family with sequence similarity 149, member A	Fam149a	NM_153535	2.70566	0.0304029
transformation related protein 73	Trp73	NM_011642	2.70464	0.0581573
solute carrier family 25 (mitochondrial carrier, brain), member 14	Slc25a14	NM_011398	2.70078	0.0159754
RuvB-like protein 1	Ruvbl1	NM_019685	2.69953	0.0229536
sodium channel, voltage-gated, type V, alpha	Scn5a	NM_021544	2.69852	0.0118694
BCL2-like 12 (proline rich)	Bcl2l12	NM_029410	2.69685	0.0495541
Rho-related BTB domain containing 1	Rhobtb1	XM_125637	2.69672	0.120453
phospholipase A2, group XVI	Pla2g16	NM_139269	2.69482	0.0541698
		NM_175656	2.69462	0.0221574
nuclear distribution gene C homolog (Aspergillus)	Nudc	NM_010948	2.69172	0.0441872
cDNA sequence BC030867	BC030867	NM_153544	2.68907	0.100082
serine (or cysteine) peptidase inhibitor, clade B (ovalbumin), member 12	Serpinb12	NM_027971	2.68703	0.11522
transmembrane protein 106C	Tmem106c	NM_201359	2.6858	0.0231891
renal tumor antigen	Rage	NM_011973	2.68484	0.0341451
		NM_207228	2.68467	0.0139181
transformed mouse 3T3 cell double minute 1	Mdm1	NM_148922	2.68361	0.0404551
exocyst complex component 2	Exoc2	NM_025588	2.68099	0.0320496
DEAH (Asp-Glu-Ala-His) box polypeptide 40	Dhx40	NM_026191	2.67909	0.0218085
CD97 antigen	Cd97	NM_011925	2.67802	0.07175
homeodomain leucine zipper-encoding gene	Homez	NM_183174	2.67354	0.023572
calpain 10	Capn10	NM_011796	2.67333	0.0225431
phosphate cytidylyltransferase 1, choline, beta isoform	Pcyt1b	NM_177546	2.6733	0.0171462
membrane protein, palmitoylated 4 (MAGUK p55 subfamily member 4)	Mpp4	NM_145143	2.67228	0.22633
		NM_026339	2.66942	0.0195248
cell adhesion molecule 1	Cadm1	NM_018770	2.66852	0.0151023
		NM_026008	2.66788	0.0183296
non-SMC condensin I complex, subunit H	Ncaph	NM_144818	2.66581	0.0609169
		XM_135829	2.66415	0.0592318
DEAD (Asp-Glu-Ala-Asp) box polypeptide 20	Ddx20	NM_017397	2.66378	0.0304029
		NM_011497	2.66262	0.0792414
phosphodiesterase 8B	Pde8b	NM_172263	2.66247	0.0456478
USP6 N-terminal like	Usp6nl	NM_181399	2.66135	0.0450207
family with sequence similarity 54, member A	Fam54a	NM_027930	2.65721	0.0904116
family with sequence similarity 102, member B	Fam102b	XM_283903	2.65644	0.126835
TBC1 domain family, member 19	Tbc1d19	NM_144517	2.65528	0.0388604
		XM_484251	2.6531	0.0774944
ring finger protein 26	Rnf26	NM_153762	2.65087	0.0320496
zinc finger protein 446	Zfp446	NM_175558	2.65067	0.0302776
WD repeat domain 27	Wdr27	NM_175173	2.64973	0.0320651
prostate stem cell antigen	Psca	NM_028216	2.64954	0.0583607
MTERF domain containing 2	Mterfd2	NM_178051	2.64797	0.0282816
leucine-rich repeats and WD repeat domain containing 1	Lrwd1	NM_027891	2.64786	0.0510002
WD repeat domain 92	Wdr92	NM_178909	2.64738	0.0184929
tubulin tyrosine ligase-like family, member 8	Ttll8	NM_172818	2.646	0.0151822
non-metastatic cells 7, protein expressed in (nucleoside-diphosphate kinase)	Nme7	NM_138314	2.64514	0.115934
heat shock protein 12A	Hspa12a	NM_175199	2.64407	0.0511718
regulatory factor X, 3 (influences HLA class II expression)	Rfx3	NM_011265	2.6419	0.0188958
RIKEN cDNA 1700054N08 gene	1700054N08Rik	XM_134542	2.63943	0.0485921
methyltransferase like 6	Mettl6	NM_025907	2.63758	0.0424862
S100 calcium binding protein G	S100g	NM_009789	2.63663	0.122787
prolyl endopeptidase-like	Prepl	NM_145984	2.629	0.0245098
cysteine-rich protein 3	Crip3	NM_053250	2.62808	0.0336354
TLC domain containing 1	Tlcd1	NM_026708	2.6271	0.0246999
DPY30 domain containing 1	Dydc1	XM_127632	2.62698	0.0405737
tribbles homolog 2 (Drosophila)	Trib2	NM_144551	2.62126	0.0783581
Iroquois related homeobox 5 (Drosophila)	Irx5	NM_018826	2.62085	0.0685097
IQ motif containing G	Iqcg	NM_178378	2.61974	0.0269333
sperm associated antigen 17	Spag17	NM_028892	2.61498	0.0297281
melanoma associated antigen (mutated) 1-like 1	Mum1l1	NM_175541	2.61438	0.18659
histone cluster 1, H4h	Hist1h4h	NM_153173	2.61383	0.0334328
cholecystokinin B receptor	Cckbr	NM_007627	2.60872	0.0319179
		XM_485953	2.60829	0.0426975
OTU domain containing 3	Otud3	XM_131770	2.59947	0.036284
coiled-coil alpha-helical rod protein 1	Cchcr1	NM_146248	2.59757	0.0245926
RIKEN cDNA 2210404O07 gene	2210404O07Rik	XM_125703	2.59743	0.0493632
opposite strand transcription unit to Stag3	Gats	NM_030719	2.59596	0.0245604
protein phosphatase 1, regulatory (inhibitor) subunit 16A	Ppp1r16a	NM_033371	2.59382	0.0186297
proteasome (prosome, macropain) 26S subunit, non-ATPase, 9	Psmd9	NM_026000	2.59279	0.0507271
general transcription factor IIA, 1-like	Gtf2a1l	NM_023630	2.59126	0.0606917
family with sequence similarity 82, member B	Fam82b	NM_025476	2.58766	0.0778974
pericentriolar material 1	Pcm1	NM_023662	2.58751	0.0218085
t-complex-associated testis expressed 1	Tcte1	NM_013688	2.58651	0.0326573
		XM_485001	2.58649	0.036284
pleckstrin homology domain containing, family B (evectins) member 1	Plekhb1	NM_013746	2.58567	0.081061
phosphatidylserine decarboxylase	Pisd	NM_177298	2.58022	0.0451772
ADP-ribosylation factor-like 13B	Arl13b	NM_026577	2.57956	0.0725313
protein phosphatase 4, regulatory subunit 4	Ppp4r4	NM_028980	2.57815	0.0245926
dpy-19-like 1 (C. elegans)	Dpy19l1	NM_172920	2.57455	0.153179
PHD finger protein 7	Phf7	NM_027949	2.57365	0.0277162
protein-O-mannosyltransferase 1	Pomt1	NM_145145	2.57084	0.0830655
		XM_484353	2.56991	0.0766788
zona pellucida glycoprotein 3	Zp3	NM_011776	2.56839	0.0260079
holocytochrome c synthetase	Hccs	NM_008222	2.56695	0.0919941
histone cluster 2, H3c2	Hist2h3c2	NM_054045	2.56556	0.0218085
v-myc myelocytomatosis viral oncogene homolog 1, lung carcinoma derived (avian)	Mycl1	NM_008506	2.56441	0.222416
NAD(P)H dehydrogenase, quinone 2	Nqo2	NM_020282	2.56261	0.0233334
nuclear assembly factor 1 homolog (S. cerevisiae)	Naf1	XM_134209	2.55863	0.0473473
RIKEN cDNA D430042O09 gene	D430042O09Rik	XM_355939	2.55788	0.0989836
RD RNA-binding protein	Rdbp	NM_138580	2.55784	0.0408032
serine palmitoyltransferase, long chain base subunit 3	Sptlc3	NM_175467	2.55676	0.180179
transformed mouse 3T3 cell double minute 1	Mdm1	NM_148922	2.55658	0.0376537
USP6 N-terminal like	Usp6nl	NM_181399	2.55615	0.0202011
		NM_026916	2.55593	0.0399729
H2A histone family, member X	H2afx	NM_010436	2.55584	0.0830351
		NM_177844	2.55516	0.0424862
intraflagellar transport 172 homolog (Chlamydomonas)	Ift172	NM_026298	2.55424	0.0645866
RIKEN cDNA D030056L22 gene	D030056L22Rik	NM_177640	2.55398	0.0768871
cysteine-rich protein 1 (intestinal)	Crip1	NM_007763	2.55276	0.0786263
outer dense fiber of sperm tails 2-like	Odf2l	AK016726	2.5515	0.035096
intraflagellar transport 88 homolog (Chlamydomonas)	Ift88	NM_009376	2.55082	0.0470224
		XM_207112	2.55081	0.082972
tubulin tyrosine ligase-like 1	Ttll1	NM_178869	2.54829	0.0352178
macrophage expressed gene 1	Mpeg1	XM_129176	2.54769	0.32341
zinc finger, DHHC domain containing 1	Zdhhc1	NM_175160	2.54194	0.0159754
TOX high mobility group box family member 3	Tox3	NM_172913	2.54175	0.0441872
radial spokehead-like 2A	Rshl2a	NM_025789	2.54061	0.196365
heat shock protein 4 like	Hspa4l	NM_011020	2.53896	0.0867883
NIMA (never in mitosis gene a)-related expressed kinase 2	Nek2	NM_010892	2.53768	0.119209
profilin 2	Pfn2	NM_019410	2.53644	0.0394374
calmodulin 3	Calm3	NM_007590	2.53541	0.0388604
spermatogenesis associated 7	Spata7	NM_178914	2.53307	0.0277162
zeta-chain (TCR) associated protein kinase	Zap70	NM_009539	2.5329	0.124357
N-acylethanolamine acid amidase	Naaa	NM_025972	2.53244	0.0441872
tubulin, delta 1	Tubd1	NM_019756	2.53162	0.0313771
tectonic family member 2	Tctn2	NM_026486	2.52994	0.0940176
histone cluster 2, H2bb	Hist2h2bb	NM_175666	2.52918	0.0376479
RIKEN cDNA 5830433M19 gene	5830433M19Rik	NM_026368	2.52847	0.0237192
plasmalemma vesicle associated protein	Plvap	NM_032398	2.52815	0.0389564
ectonucleoside triphosphate diphosphohydrolase 5	Entpd5	NM_007647	2.52733	0.0299123
obscurin-like 1	Obsl1	NM_178884	2.52576	0.102284
carnitine palmitoyltransferase 2	Cpt2	NM_009949	2.52487	0.0511718
shugoshin-like 2 (S. pombe)	Sgol2	NM_199007	2.52463	0.135481
bisphosphate 3'-nucleotidase 1	Bpnt1	NM_011794	2.52438	0.0507617
CCR4 carbon catabolite repression 4-like (S. cerevisiae)	Ccrn4l	NM_009834	2.52289	0.0629997
aldo-keto reductase family 1, member B7	Akr1b7	NM_009731	2.5201	0.0684448
RuvB-like protein 2	Ruvbl2	NM_011304	2.51963	0.0408032
Rho GTPase activating protein 24	Arhgap24	NM_029270	2.51872	0.0439848
aldehyde dehydrogenase 3 family, member B1	Aldh3b1	NM_026316	2.51708	0.0378587
centrosomal protein 97	Cep97	NM_028815	2.51563	0.0424862
methylmalonyl-Coenzyme A mutase	Mut	NM_008650	2.5147	0.0734136
WD repeat domain 19	Wdr19	NM_153391	2.51464	0.0382132
RIKEN cDNA 6030408C04 gene	6030408C04Rik	XM_126912	2.51167	0.0839537
RIKEN cDNA 1700029F09 gene	1700029F09Rik	XM_355303	2.51034	0.0586122
expressed sequence AV249152	AV249152	NM_145425	2.50955	0.0372071
sphingomyelin phosphodiesterase, acid-like 3A	Smpdl3a	NM_020561	2.50334	0.0865707
kelch repeat and BTB (POZ) domain containing 4	Kbtbd4	NM_025991	2.50171	0.0591719
		XM_484105	2.49964	0.0368685
haptoglobin	Hp	NM_017370	2.49859	0.231566
tubulin folding cofactor E-like	Tbcel	NM_173038	2.49598	0.0839145
NAD(P)H dehydrogenase, quinone 2	Nqo2	NM_020282	2.4937	0.0282816
CDC23 (cell division cycle 23, yeast, homolog)	Cdc23	NM_178347	2.49314	0.0261867
bromodomain, testis-specific	Brdt	NM_054054	2.49212	0.0495855
chloride channel calcium activated 3	Clca3	NM_017474	2.49121	0.0451684
BMX non-receptor tyrosine kinase	Bmx	NM_009759	2.49039	0.0547281
calcium/calmodulin-dependent protein kinase ID	Camk1d	NM_177343	2.49014	0.0642889
RIKEN cDNA 1100001G20 gene	1100001G20Rik	NM_183249	2.48783	0.0371759
neurolysin (metallopeptidase M3 family)	Nln	NM_029447	2.48722	0.0461118
		AF191028	2.48605	0.0565789
expressed sequence AU021034	AU021034	NM_177629	2.48596	0.0326573
vitrin	Vit	XM_128764	2.48402	0.0198653
		NM_172531	2.48285	0.0328838
metallophosphoesterase 1	Mppe1	NM_172630	2.48198	0.047609
UDP-Gal:betaGlcNAc beta 1,4-galactosyltransferase, polypeptide 4	B4galt4	NM_019804	2.48	0.20011
centrosomal protein 97	Cep97	NM_028815	2.47965	0.103954
growth factor receptor bound protein 14	Grb14	NM_016719	2.47826	0.0439848
LYR motif containing 7	Lyrm7	AK006294	2.47426	0.0609133
transmembrane protease, serine 8 (intestinal)	Tmprss8	NM_013921	2.47367	0.0829357
ATPase, H+ transporting, lysosomal V0 subunit E2	Atp6v0e2	NM_133764	2.47337	0.0475631
ryanodine receptor 2, cardiac	Ryr2	NM_023868	2.47263	0.0195873
RIKEN cDNA 2610301G19 gene	2610301G19Rik	XM_358314	2.47262	0.0772217
junction adhesion molecule 3	Jam3	NM_023277	2.47179	0.161288
histone cluster 1, H4j	Hist1h4j	NM_178210	2.47021	0.0351174
beta galactoside alpha 2,6 sialyltransferase 1	St6gal1	NM_145933	2.47012	0.502366
ect2 oncogene	Ect2	NM_007900	2.46892	0.0876119
carnitine palmitoyltransferase 1b, muscle	Cpt1b	NM_009948	2.46827	0.0894721
cytoplasmic FMR1 interacting protein 2	Cyfip2	NM_133769	2.46694	0.194276
glucosidase beta 2	Gba2	NM_172692	2.4668	0.0304029
mediator of RNA polymerase II transcription, subunit 31 homolog (yeast)	Med31	NM_026068	2.46556	0.0459014
ATM interactor	Atmin	NM_177700	2.46268	0.0410069
TAF9 RNA polymerase II, TATA box binding protein (TBP)-associated factor	Taf9	NM_027139	2.46148	0.0546746
calreticulin 3	Calr3	NM_029782	2.46131	0.0376537
protocadherin 21	Pcdh21	NM_130878	2.46089	0.0636483
homeo box B5	Hoxb5	NM_008268	2.45513	0.0287066
mediator complex subunit 26	Med26	NM_027485	2.4534	0.343991
distal-less homeobox 4	Dlx4	NM_007867	2.45087	0.0655729
intelectin 1 (galactofuranose binding)	Itln1	NM_010584	2.45054	0.269356
zinc finger protein 238	Zfp238	NM_013915	2.44941	0.0865707
coiled-coil domain containing 57	Ccdc57	XM_126681	2.44922	0.0352428
enabled homolog (Drosophila)	Enah	NM_010135	2.44767	0.0245604
DEAD (Asp-Glu-Ala-Asp) box polypeptide 54	Ddx54	NM_028041	2.44561	0.0451684
dynein, axonemal, heavy chain 11	Dnahc11	NM_010060	2.44357	0.0376537
		NM_025885	2.44242	0.0423436
deltex 1 homolog (Drosophila)	Dtx1	NM_008052	2.43858	0.0799469
		XM_489138	2.43812	0.0559008
casein kappa	Csn3	NM_007786	2.43784	0.309966
testis expressed gene 11	Tex11	NM_031384	2.43724	0.145304
ankyrin repeat and BTB (POZ) domain containing 2	Abtb2	NM_178890	2.43708	0.10439
helicase-like transcription factor	Hltf	NM_009210	2.43701	0.0902165
FtsJ homolog 1 (E. coli)	Ftsj1	NM_133991	2.43624	0.0684816
general transcription factor IIB	Gtf2b	NM_145546	2.43603	0.0710306
bicaudal C homolog 1 (Drosophila)	Bicc1	AK076154	2.43541	0.188575
tektin 1	Tekt1	NM_011569	2.43457	0.350981
Paf1, RNA polymerase II associated factor, homolog (S. cerevisiae)	Paf1	NM_019458	2.43379	0.0474379
coiled-coil domain containing 64	Ccdc64	XM_132372	2.4328	0.0400361
unc-119 homolog B (C. elegans)	Unc119b	NM_175352	2.43052	0.0312322
5-azacytidine induced gene 1	Azi1	NM_009734	2.4305	0.067185
PRP40 pre-mRNA processing factor 40 homolog B (yeast)	Prpf40b	NM_018786	2.43024	0.0507617
Sfi1 homolog, spindle assembly associated (yeast)	Sfi1	NM_030207	2.43016	0.0700056
activity regulated cytoskeletal-associated protein	Arc	NM_018790	2.43015	0.0388604
gem (nuclear organelle) associated protein 6	Gemin6	NM_026053	2.42986	0.0555668
RIKEN cDNA 1700018F24 gene	1700018F24Rik	NM_027069	2.42972	0.0440826
small nuclear ribonucleoprotein 25 (U11/U12)	Snrnp25	NM_030093	2.42779	0.0642025
caspase 7	Casp7	NM_007611	2.42752	0.0746269
ubiquitin specific peptidase 54	Usp54	NM_030180	2.42695	0.0500709
leucine zipper, down-regulated in cancer 1-like	Ldoc1l	NM_177630	2.42603	0.0634153
acyl-CoA synthetase long-chain family member 3	Acsl3	XM_129894	2.42454	0.0353846
l(3)mbt-like 2 (Drosophila)	L3mbtl2	NM_145993	2.42215	0.0471285
RIKEN cDNA 4930402H24 gene	4930402H24Rik	NM_029432	2.42081	0.0277162
		NM_153569	2.41979	0.0998538
RIKEN cDNA 4930555I21 gene	4930555I21Rik	NM_030189	2.41935	0.0585106
Coenzyme A synthase	Coasy	NM_027896	2.41914	0.0235269
cytochrome c oxidase subunit VIb polypeptide 2	Cox6b2	NM_183405	2.41846	0.154626
phosphatidylserine synthase 2	Ptdss2	NM_013782	2.41549	0.0406549
dystrobrevin alpha	Dtna	NM_010087	2.41523	0.0595511
PR domain containing 8	Prdm8	NM_029947	2.41384	0.0456148
HEAT repeat containing 5A	Heatr5a	NM_177171	2.41335	0.0454783
a disintegrin-like and metallopeptidase (reprolysin type) with thrombospondin type 1 motif, 8	Adamts8	NM_013906	2.41237	0.0600979
polymerase (DNA directed), epsilon 3 (p17 subunit)	Pole3	NM_021498	2.41153	0.0958842
TAF9 RNA polymerase II, TATA box binding protein (TBP)-associated factor	Taf9	NM_027592	2.40898	0.0811925
heat shock protein 90, alpha (cytosolic), class A member 1	Hsp90aa1	NM_010480	2.4083	0.0921075
homeodomain leucine zipper-encoding gene	Homez	NM_183174	2.40769	0.0355804
		XM_356255	2.40666	0.108398
neuromedin B	Nmb	NM_026523	2.40468	0.0642025
baculoviral IAP repeat-containing 2	Birc2	NM_007465	2.40448	0.0513034
brain abundant, membrane attached signal protein 1	Basp1	NM_027395	2.40438	0.129485
bactericidal/permeability-increasing protein-like 2	Bpil2	NM_177772	2.4028	0.0546746
		XM_135158	2.40094	0.0839145
anterior pharynx defective 1b homolog (C. elegans)	Aph1b	NM_177583	2.40042	0.0443721
laminin B1 subunit 1	Lamb1-1	NM_008482	2.40038	0.0495798
fatty acid desaturase 3	Fads3	NM_021890	2.40017	0.0606917
tetratricopeptide repeat domain 21A	Ttc21a	XM_135216	2.40011	0.0793184
solute carrier family 35, member B3	Slc35b3	NM_134060	2.39972	0.0679662
renal tumor antigen	Rage	NM_011973	2.39918	0.0383364
ATP synthase, H+ transporting, mitochondrial F0 complex, subunit s	Atp5s	NM_026536	2.39918	0.0338297
replication factor C (activator 1) 2	Rfc2	NM_020022	2.39712	0.113697
family with sequence similarity 19, member A1	Fam19a1	NM_182808	2.3971	0.107228
membrane-associated ring finger (C3HC4) 8	Mar8	NM_027920	2.39487	0.0427018
choline kinase alpha	Chka	NM_013490	2.39134	0.112666
F-box and leucine-rich repeat protein 13	Fbxl13	NM_177076	2.39037	0.0672771
DOM-3 homolog Z (C. elegans)	Dom3z	NM_033613	2.38846	0.0378587
heat shock 105kDa/110kDa protein 1	Hsph1	NM_013559	2.38844	0.0841223
brain expressed gene 1	Bex1	NM_009052	2.38717	0.0378587
RIKEN cDNA 1110004E09 gene	1110004E09Rik	NM_026502	2.38685	0.138589
G protein-coupled receptor kinase 4	Grk4	NM_019497	2.38624	0.0434282
		NM_054043	2.38581	0.1026
RIKEN cDNA 4931406C07 gene	4931406C07Rik	NM_133732	2.38449	0.0998141
nephronophthisis 1 (juvenile) homolog (human)	Nphp1	NM_016902	2.38086	0.0998141
DnaJ (Hsp40) homolog, subfamily B, member 14	Dnajb14	XM_131212	2.38015	0.0689758
dynein, axonemal, light chain 4	Dnalc4	NM_017470	2.3767	0.0451684
DnaJ (Hsp40) homolog, subfamily B, member 2	Dnajb2	NM_020266	2.37542	0.0440826
mitochondrial fission regulator 1	Mtfr1	NM_026182	2.37496	0.0509743
PHD finger protein 20	Phf20	BC060121	2.3734	0.0709373
histone cluster 1, H1d	Hist1h1d	NM_145713	2.37319	0.0566145
GRAM domain containing 1B	Gramd1b	NM_172768	2.36972	0.28432
		NM_029301	2.36959	0.348823
fidgetin-like 1	Fignl1	NM_021891	2.36893	0.049822
glycerophosphodiester phosphodiesterase domain containing 1	Gdpd1	NM_025638	2.36608	0.0753211
adenylate cyclase activating polypeptide 1 receptor 1	Adcyap1r1	NM_007407	2.36547	0.0391815
cyclin-dependent kinase 5, regulatory subunit 1 (p35)	Cdk5r1	NM_009871	2.3652	0.061195
kinesin-associated protein 3	Kifap3	NM_010629	2.3643	0.0312322
minichromosome maintenance deficient 8 (S. cerevisiae)	Mcm8	NM_025676	2.3616	0.0885486
chemokine-like factor	Cklf	NM_029295	2.36095	0.0606917
histone cluster 2, H2aa1	Hist2h2aa1	NM_013549	2.35484	0.0432547
mitochondria-associated protein involved in granulocyte-macrophage colony-stimulating factor signal transduction	Magmas	NM_025571	2.35349	0.0389564
olfactomedin-like 2B	Olfml2b	NM_177068	2.35328	0.165959
abhydrolase domain containing 8	Abhd8	NM_022419	2.3511	0.0829846
RIKEN cDNA 1700027A23 gene	1700027A23Rik	XM_131115	2.35089	0.300057
RIKEN cDNA 4930562D19 gene	4930562D19Rik	NM_177616	2.34854	0.063741
ChaC, cation transport regulator-like 1 (E. coli)	Chac1	NM_026929	2.3478	0.130071
		XM_196324	2.34749	0.0599717
coiled-coil-helix-coiled-coil-helix domain containing 10	Chchd10	NM_175329	2.34635	0.224085
WD repeat domain 31	Wdr31	NM_023597	2.34456	0.0867055
RIKEN cDNA 4930402H24 gene	4930402H24Rik	NM_029432	2.34387	0.030706
potassium channel tetramerisation domain containing 13	Kctd13	NM_172747	2.34322	0.107548
FH2 domain containing 1	Fhdc1	XM_130991	2.34264	0.0391815
synaptotagmin V	Syt5	NM_016908	2.34244	0.0490531
histone cluster 1, H2be	Hist1h2be	NM_178194	2.34218	0.0549855
ectonucleoside triphosphate diphosphohydrolase 1	Entpd1	NM_009848	2.34124	0.124357
homeo box D4	Hoxd4	NM_010469	2.34104	0.241681
elongation factor 1 homolog (ELF1, S. cerevisiae)	Elof1	NM_170777	2.34023	0.188258
ankyrin repeat and SOCS box-containing 7	Asb7	NM_080443	2.33946	0.066908
allantoicase	Allc	NM_053156	2.33837	0.103956
StAR-related lipid transfer (START) domain containing 4	Stard4	NM_133774	2.33738	0.154281
hydroxysteroid dehydrogenase like 1	Hsdl1	NM_175185	2.33456	0.0821172
maternal embryonic leucine zipper kinase	Melk	NM_010790	2.33438	0.112249
ST6 (alpha-N-acetyl-neuraminyl-2,3-beta-galactosyl-1,3)-N-acetylgalactosaminide alpha-2,6-sialyltransferase 4	St6galnac4	NM_011373	2.33435	0.152537
X-prolyl aminopeptidase (aminopeptidase P) 3, putative	Xpnpep3	NM_177310	2.33246	0.0541698
AP1 gamma subunit binding protein 1	Ap1gbp1	NM_194341	2.33234	0.0509822
centrosomal protein 97	Cep97	NM_028815	2.33098	0.0937467
GrpE-like 2, mitochondrial	Grpel2	NM_021296	2.3301	0.0468362
enabled homolog (Drosophila)	Enah	NM_010135	2.32994	0.0378587
		XM_485258	2.32809	0.0609169
Bardet-Biedl syndrome 2 (human)	Bbs2	NM_026116	2.32765	0.0514995
		NM_029327	2.32746	0.0642889
outer dense fiber of sperm tails 2	Odf2	NM_013615	2.32662	0.063618
family with sequence similarity 161, member A	Fam161a	NM_028672	2.32595	0.0430944
guanine nucleotide binding protein (G protein), gamma 13	Gng13	NM_022422	2.32573	0.0608378
		XM_488701	2.32412	0.0466047
DOM-3 homolog Z (C. elegans)	Dom3z	NM_033613	2.32258	0.106821
peptidase inhibitor 16	Pi16	NM_023734	2.3224	0.060428
		NM_027507	2.32155	0.0357652
ADP-ribosylation factor-like 3	Arl3	NM_019718	2.32152	0.0811705
CDC42 effector protein (Rho GTPase binding) 3	Cdc42ep3	NM_026514	2.32066	0.0814024
N-acetyltransferase 9 (GCN5-related, putative)	Nat9	NM_025400	2.3199	0.063618
diacylglycerol O-acyltransferase 2	Dgat2	NM_026384	2.31904	0.100082
chloride channel 3	Clcn3	AK029892	2.31797	0.104664
ring finger protein 125	Rnf125	NM_026301	2.31691	0.132356
tubulin tyrosine ligase-like family, member 13	Ttll13	NM_177765	2.31687	0.0408032
		AK029470	2.3131	0.229957
cDNA sequence BC022960	BC022960	XM_136142	2.31145	0.0725313
retinitis pigmentosa GTPase regulator	Rpgr	NM_011285	2.30998	0.0408032
nicolin 1	Nicn1	NM_025449	2.30938	0.0581771
M-phase phosphoprotein 8	Mphosph8	NM_023773	2.30836	0.0491815
mediator of RNA polymerase II transcription, subunit 25 homolog (yeast)	Med25	NM_029365	2.30424	0.0850991
		NC_002512	2.30412	0.0972866
tripartite motif-containing 39	Trim39	NM_024468	2.30282	0.0696651
sorting nexin 26	Snx26	NM_178252	2.30189	0.176974
outer dense fiber of sperm tails 2	Odf2	NM_013615	2.29915	0.0611671
oncomodulin	Ocm	NM_033039	2.29792	0.036284
DnaJ (Hsp40) homolog, subfamily C, member 15	Dnajc15	NM_025384	2.29773	0.0867883
triggering receptor expressed on myeloid cells-like 1	Treml1	XM_128641	2.2975	0.0646918
threonine synthase-like 2 (bacterial)	Thnsl2	NM_178413	2.29677	0.0432547
DEAD (Asp-Glu-Ala-Asp) box polypeptide 19b	Ddx19b	NM_172284	2.29614	0.0346322
neuronal guanine nucleotide exchange factor	Ngef	NM_019867	2.29447	0.0611284
ubiquitin specific peptidase 43	Usp43	NM_173754	2.29425	0.0710306
tripartite motif-containing 41	Trim41	NM_145377	2.29409	0.0837783
thymoma viral proto-oncogene 3	Akt3	NM_011785	2.29308	0.0575733
brain expressed gene 1	Bex1	NM_009052	2.29224	0.0480846
rogdi homolog (Drosophila)	Rogdi	NM_133185	2.29198	0.0378587
RIKEN cDNA 4930573I19 gene	4930573I19Rik	XM_127142	2.29112	0.0540827
TRIO and F-actin binding protein	Triobp	NM_138579	2.29108	0.0600979
agmatine ureohydrolase (agmatinase)	Agmat	XM_131722	2.29085	0.0541698
adenylate cyclase 6	Adcy6	NM_007405	2.28829	0.0839145
dihydroxyacetone kinase 2 homolog (yeast)	Dak	NM_145496	2.28822	0.0419608
transmembrane protein 218	Tmem218	NM_025464	2.28685	0.0546746
		NM_027740	2.28676	0.138995
RIKEN cDNA 4933425L03 gene	4933425L03Rik	XM_484121	2.28518	0.0371759
predicted gene, EG331529	EG331529	NM_183320	2.28492	0.102853
frizzled homolog 3 (Drosophila)	Fzd3	NM_021458	2.28488	0.0458353
BTB (POZ) domain containing 10	Btbd10	NM_133700	2.28444	0.0343802
centrin 2	Cetn2	NM_019405	2.28393	0.116158
cDNA sequence BC053749	BC053749	NM_183321	2.28334	0.0439529
RNA terminal phosphate cyclase domain 1	Rtcd1	NM_025517	2.28243	0.0587774
cDNA sequence BC007180	BC007180	XM_131217	2.2823	0.205773
cryptochrome 2 (photolyase-like)	Cry2	NM_009963	2.28162	0.0450207
frequenin homolog (Drosophila)	Freq	NM_019681	2.28142	0.0591719
sulfotransferase family, cytosolic, 6B, member 1	Sult6b1	XM_356960	2.28126	0.0404551
RIKEN cDNA 2210011C24 gene	2210011C24Rik	XM_356097	2.28044	0.0439848
		XM_129366	2.27912	0.0541698
		XM_203404	2.27666	0.113315
eukaryotic translation initiation factor 2B, subunit 2 beta	Eif2b2	NM_145445	2.27619	0.0998538
SEC14-like 1 (S. cerevisiae)	Sec14l1	NM_028777	2.27576	0.092023
predicted gene, ENSMUSG00000033219	ENSMUSG00000033219	NM_198666	2.27374	0.0655729
thimet oligopeptidase 1	Thop1	NM_022653	2.27308	0.0490531
transmembrane protein 216	Tmem216	NM_026798	2.27153	0.0894721
UHRF1 (ICBP90) binding protein 1-like	Uhrf1bp1l	NM_029166	2.27061	0.0778969
malic enzyme 2, NAD(+)-dependent, mitochondrial	Me2	NM_145494	2.26983	0.0743351
cDNA sequence BC046331	BC046331	NM_177673	2.26801	0.108298
outer dense fiber of sperm tails 2	Odf2	NM_013615	2.268	0.0644784
frequently rearranged in advanced T-cell lymphomas 2	Frat2	NM_177603	2.26714	0.0938396
R3H domain containing 2	R3hdm2	NM_027900	2.26648	0.0879437
D-aspartate oxidase	Ddo	NM_027442	2.26535	0.125113
WW domain binding protein 11	Wbp11	NM_021714	2.263	0.0709373
suppressor of zeste 12 homolog (Drosophila)	Suz12	NM_199196	2.26293	0.130695
solute carrier family 7 (cationic amino acid transporter, y+ system), member 7	Slc7a7	NM_011405	2.26261	0.0599717
B9 protein domain 2	B9d2	NM_172148	2.26232	0.063618
major histocompatibility complex, class I-related	Mr1	NM_008209	2.26218	0.059076
prolyl endopeptidase-like	Prepl	NM_145984	2.26097	0.0441872
sorting nexin 11	Snx11	NM_028965	2.25898	0.047609
lipoic acid synthetase	Lias	NM_024471	2.25724	0.0525696
membrane associated guanylate kinase, WW and PDZ domain containing 1	Magi1	NM_010367	2.25663	0.0362853
PRP3 pre-mRNA processing factor 3 homolog (yeast)	Prpf3	NM_027541	2.25485	0.0681825
porcupine homolog (Drosophila)	Porcn	NM_016913	2.25414	0.0490531
dehydrogenase/reductase (SDR family) member 11	Dhrs11	NM_177564	2.25353	0.0444146
RIKEN cDNA 1600012H06 gene	1600012H06Rik	NM_026451	2.25227	0.126835
		NM_028502	2.25227	0.0710306
HEAT repeat containing 5A	Heatr5a	NM_177171	2.25196	0.0364628
		XM_284024	2.25144	0.0406549
		XM_135711	2.25005	0.0930153
myosin, heavy polypeptide 10, non-muscle	Myh10	NM_175260	2.24712	0.183194
centrosomal protein 350	Cep350	XM_129509	2.246	0.0825655
cholecystokinin A receptor	Cckar	NM_009827	2.2425	0.164535
UBX domain protein 11	Ubxn11	NM_026257	2.24205	0.0579421
acid phosphatase-like 2	Acpl2	NM_153420	2.24113	0.0490531
src-like adaptor	Sla	NM_009192	2.23925	0.304325
FYVE, RhoGEF and PH domain containing 2	Fgd2	NM_013710	2.23729	0.17848
RIKEN cDNA 2310005E10 gene	2310005E10Rik	NM_172398	2.23623	0.0815421
tubulin, alpha 3A	Tuba3a	NM_009446	2.23508	0.0569977
protein phosphatase 1B, magnesium dependent, beta isoform	Ppm1b	NM_011151	2.23502	0.0783776
ral guanine nucleotide dissociation stimulator	Ralgds	NM_009058	2.23494	0.0509822
decay accelerating factor 2	Daf2	NM_007827	2.2333	0.0776883
dpy-30 homolog (C. elegans)	Dpy30	NM_024428	2.23273	0.09981
macrophage galactose N-acetyl-galactosamine specific lectin 1	Mgl1	NM_010796	2.23134	0.0591719
small EDRK-rich factor 1	Serf1	NM_011353	2.23007	0.0684816
N-acetylglutamate synthase	Nags	NM_145829	2.22949	0.0876119
WD repeat domain 31	Wdr31	NM_023597	2.22844	0.0509822
prostaglandin E synthase 3 (cytosolic)	Ptges3	NM_019766	2.22818	0.0998141
1-acylglycerol-3-phosphate O-acyltransferase 4 (lysophosphatidic acid acyltransferase, delta)	Agpat4	NM_026644	2.22739	0.117775
chromatin assembly factor 1, subunit A (p150)	Chaf1a	NM_013733	2.22733	0.130695
histocompatibility 2, Q region locus 10	H2-Q10	NM_010391	2.22563	0.0574599
cytokine inducible SH2-containing protein	Cish	NM_009895	2.22478	0.0734136
coiled-coil domain containing 123	Ccdc123	NM_028120	2.22475	0.0674801
		XM_134736	2.22435	0.0455651
arachidonate 15-lipoxygenase	Alox15	NM_009660	2.22213	0.0721268
HMG box domain containing 3	Hmgxb3	NM_134134	2.22126	0.0446625
family with sequence similarity 151, member B	Fam151b	XM_127489	2.22094	0.113592
leucine rich repeat and Ig domain containing 1	Lingo1	NM_181074	2.22061	0.0497369
claspin homolog (Xenopus laevis)	Clspn	NM_175554	2.21737	0.236358
RIKEN cDNA 1700016K19 gene	1700016K19Rik	NM_198637	2.21534	0.421419
carnitine palmitoyltransferase 1c	Cpt1c	NM_153679	2.21457	0.0734136
monoacylglycerol O-acyltransferase 1	Mogat1	NM_026713	2.21283	0.0536128
RIKEN cDNA F630043A04 gene	F630043A04Rik	NM_198605	2.20925	0.136977
RIKEN cDNA 2310007B03 gene	2310007B03Rik	NM_172411	2.20906	0.211411
kinesin family member 2C	Kif2c	NM_134471	2.20899	0.158144
transformation related protein 53 regulating kinase	Trp53rk	NM_023815	2.20867	0.08322
amyloid beta (A4) precursor protein-binding, family B, member 1	Apbb1	NM_009685	2.20763	0.0591719
kelch-like 7 (Drosophila)	Klhl7	NM_026448	2.20753	0.0555071
potassium voltage-gated channel, subfamily H (eag-related), member 3	Kcnh3	NM_010601	2.20478	0.0707454
START domain containing 7	Stard7	NM_139308	2.20413	0.0998538
phosphoglucomutase 2-like 1	Pgm2l1	NM_027629	2.20377	0.0546746
RAS-like, family 10, member A	Rasl10a	NM_145216	2.20362	0.0963251
potassium channel tetramerisation domain containing 5	Kctd5	NM_027008	2.20137	0.0887115
claudin 2	Cldn2	NM_016675	2.20075	0.0507617
pre-B-cell leukemia homeobox 4	Pbx4	AJ300183	2.2005	0.0451684
RIKEN cDNA 4732415M23 gene	4732415M23Rik	NM_177279	2.1998	0.0495855
RIKEN cDNA A030009H04 gene	A030009H04Rik	NM_020591	2.19752	0.0588293
stannin	Snn	NM_009223	2.19706	0.0684816
membrane-associated ring finger (C3HC4) 9	2009-03-09	XM_125947	2.19618	0.0955226
rhophilin, Rho GTPase binding protein 1	Rhpn1	NM_008164	2.19593	0.061195
calcyphosphine 2	Caps2	NM_178278	2.19417	0.0935128
solute carrier family 41, member 2	Slc41a2	NM_177388	2.19182	0.1687
transmembrane channel-like gene family 1	Tmc1	NM_028953	2.1881	0.0978836
polycomb group ring finger 5	Pcgf5	NM_029508	2.18771	0.0710306
transforming, acidic coiled-coil containing protein 1	Tacc1	NM_177089	2.18628	0.150199
uridine-cytidine kinase 1	Uck1	NM_011675	2.18614	0.0503083
coiled-coil domain containing 77	Ccdc77	NM_026028	2.18547	0.0458244
		XM_486022	2.18504	0.124357
RIKEN cDNA 2610301B20 gene	2610301B20Rik	NM_026005	2.18311	0.0557562
aldo-keto reductase family 1, member C12	Akr1c12	NM_013777	2.18301	0.185908
microtubule associated serine/threonine kinase 2	Mast2	NM_008641	2.18133	0.13341
histone cluster 1, H2bc	Hist1h2bc	NM_023422	2.17961	0.179921
zinc finger protein 354B	Zfp354b	NM_013744	2.17801	0.0608378
inhibitor of kappaB kinase epsilon	Ikbke	NM_019777	2.17735	0.11522
N-terminal EF-hand calcium binding protein 2	Necab2	NM_054095	2.17521	0.081061
synaptotagmin XI	Syt11	NM_018804	2.17476	0.0763655
peroxisomal biogenesis factor 11 gamma	Pex11c	NM_026951	2.17325	0.0707715
Fanconi anemia, complementation group D2	Fancd2	XM_132796	2.17309	0.149457
hedgehog acyltransferase-like	Hhatl	NM_029095	2.17253	0.0829357
spermatogenesis associated 13	Spata13	XM_147847	2.17203	0.102143
cAMP responsive element modulator	Crem	AK015641	2.17134	0.0810145
calmodulin 1	Calm1	NM_009790	2.17033	0.159472
RIKEN cDNA 2610020H08 gene	2610020H08Rik	NM_001004187	2.16771	0.0940753
polynucleotide kinase 3'- phosphatase	Pnkp	NM_021549	2.16752	0.0575883
cytoplasmic FMR1 interacting protein 2	Cyfip2	NM_133769	2.1672	0.129533
RIKEN cDNA 1700001O22 gene	1700001O22Rik	NM_198000	2.16493	0.0376479
RIKEN cDNA 4930505A04 gene	4930505A04Rik	XM_126074	2.16418	0.0378587
aarF domain containing kinase 4	Adck4	NM_133770	2.16319	0.138395
ATPase, Ca++ transporting, ubiquitous	Atp2a3	NM_016745	2.16123	0.285788
leucine zipper transcription factor-like 1	Lztfl1	NM_033322	2.16054	0.0867055
solute carrier family 13 (sodium-dependent dicarboxylate transporter), member 2	Slc13a2	NM_022411	2.15978	0.0511718
F-box and WD-40 domain protein 9	Fbxw9	NM_026791	2.15876	0.108867
growth arrest-specific 2 like 3	Gas2l3	XM_137276	2.15638	0.191062
RIKEN cDNA 1700021C14 gene	1700021C14Rik	XM_355444	2.15593	0.061195
spermatogenesis associated glutamate (E)-rich protein 4d	Speer4d	NM_025759	2.15443	0.0897858
zinc finger protein 655	Zfp655	NM_028298	2.15389	0.0829846
plakophilin 2	Pkp2	NM_026163	2.15286	0.0887115
		XM_484158	2.15285	0.0594455
RIKEN cDNA 4930519L02 gene	4930519L02Rik	XM_203243	2.1528	0.0998538
tripartite motif-containing 41	Trim41	NM_145377	2.1513	0.062482
CCR4 carbon catabolite repression 4-like (S. cerevisiae)	Ccrn4l	NM_009834	2.14953	0.0622295
enoyl Coenzyme A hydratase domain containing 3	Echdc3	NM_024208	2.14881	0.191282
zinc finger, MYM-type 3	Zmym3	NM_019831	2.14841	0.0811626
cysteine and glycine-rich protein 2	Csrp2	NM_007792	2.14798	0.160616
thymocyte nuclear protein 1	Thyn1	NM_144543	2.14735	0.116402
coiled-coil domain containing 60	Ccdc60	NM_177759	2.1456	0.0879883
		NM_183101	2.14408	0.239663
DNA segment, Chr 1, ERATO Doi 622, expressed	D1Ertd622e	NM_133825	2.14162	0.0546746
RIKEN cDNA 4632415K11 gene	4632415K11Rik	NM_028883	2.14148	0.0635037
G protein-coupled receptor 149	Gpr149	NM_177346	2.14111	0.362528
ankyrin repeat and SOCS box-containing 1	Asb1	XM_149066	2.14044	0.0609133
regulator of G-protein signaling 14	Rgs14	NM_016758	2.14002	0.0688596
ankyrin repeat domain 33B	Ankrd33b	NM_026153	2.137	0.281279
		XM_356077	2.13546	0.0738107
interferon zeta	Ifnz	NM_197889	2.13519	0.08322
		NM_178076	2.13485	0.0986566
Bardet-Biedl syndrome 10 (human)	Bbs10	XM_125817	2.13351	0.0507617
RIKEN cDNA 1110006G06 gene	1110006G06Rik	NM_028661	2.13294	0.055657
		NM_028539	2.13269	0.0829357
ankyrin repeat domain 5	Ankrd5	NM_175667	2.13139	0.0930987
EF-hand calcium binding domain 6	Efcab6	NM_029946	2.13138	0.0776883
ATP-binding cassette, sub-family C (CFTR/MRP), member 5	Abcc5	NM_013790	2.12998	0.119301
ATP-binding cassette, sub-family C (CFTR/MRP), member 12	Abcc12	NM_172912	2.12885	0.0963481
		XM_484158	2.12786	0.0586552
		NM_053170	2.1278	0.0642889
		XM_126928	2.12724	0.109149
zinc finger, SWIM domain containing 2	Zswim2	NM_027964	2.12678	0.0555668
zinc finger, SWIM domain containing 4	Zswim4	NM_172503	2.1258	0.0734667
DnaJ (Hsp40) homolog, subfamily C, member 27	Dnajc27	NM_153082	2.12572	0.149819
HEAT repeat containing 5A	Heatr5a	NM_177171	2.1257	0.0357872
transmembrane protein 53	Tmem53	NM_026837	2.12553	0.108601
RIKEN cDNA 1810063B05 gene	1810063B05Rik	NM_174987	2.12535	0.0581771
muscle and microspikes RAS	Mras	NM_008624	2.12511	0.134498
zinc finger protein 184 (Kruppel-like)	Zfp184	NM_183014	2.12254	0.0972866
RIKEN cDNA 2310030G06 gene	2310030G06Rik	NM_025865	2.12204	0.204725
lipoma HMGIC fusion partner	Lhfp	NM_175386	2.1209	0.434103
leucine rich repeat containing 67	Lrrc67	NM_145692	2.12029	0.0474535
general transcription factor IIIC, polypeptide 4	Gtf3c4	NM_172977	2.1202	0.0594514
serine/threonine kinase 17b (apoptosis-inducing)	Stk17b	NM_133810	2.12018	0.130027
RIKEN cDNA 1810048J11 gene	1810048J11Rik	NM_026327	2.11982	0.0490531
Ral GEF with PH domain and SH3 binding motif 2	Ralgps2	NM_023884	2.11842	0.0740165
p21 (CDKN1A)-activated kinase 4	Pak4	NM_027470	2.11803	0.0850991
CAS1 domain containing 1	Casd1	NM_145398	2.11739	0.0872987
		XM_125625	2.11658	0.0567231
Smad nuclear interacting protein 1	Snip1	NM_175246	2.11602	0.100082
regulator of G-protein signaling 3	Rgs3	NM_019492	2.11576	0.106357
		XM_110787	2.11397	0.0986046
radixin	Rdx	NM_009041	2.11311	0.117356
RIKEN cDNA 2610204G22 gene	2610204G22Rik	NM_175157	2.10918	0.0540294
methionine sulfoxide reductase B2	Msrb2	NM_029619	2.10774	0.0535115
RIKEN cDNA 4733401H18 gene	4733401H18Rik	NM_023247	2.10736	0.296859
RIKEN cDNA D130043K22 gene	D130043K22Rik	XM_111397	2.10714	0.0978836
Ctr9, Paf1/RNA polymerase II complex component, homolog (S. cerevisiae)	Ctr9	NM_009431	2.10613	0.081061
brain-specific angiogenesis inhibitor 1-associated protein 2	Baiap2	AK049469	2.10573	0.090901
RIKEN cDNA 1700011H14 gene	1700011H14Rik	NM_025956	2.10558	0.0938396
secernin 3	Scrn3	XM_130303	2.10553	0.0634153
nitric oxide synthase 3, endothelial cell	Nos3	NM_008713	2.10542	0.148707
sushi, nidogen and EGF-like domains 1	Sned1	NM_172463	2.10527	0.144446
RIKEN cDNA 1700030J22 gene	1700030J22Rik	XM_134467	2.10392	0.0712975
engulfment and cell motility 1, ced-12 homolog (C. elegans)	Elmo1	NM_198093	2.10297	0.272362
fibronectin type III and SPRY domain containing 1-like	Fsd1l	NM_176966	2.10287	0.165727
expressed sequence AI317395	AI317395	NM_144821	2.10141	0.0571355
RIKEN cDNA 4933432B09 gene	4933432B09Rik	XM_128197	2.10123	0.0549855
SUMO/sentrin specific peptidase 2	Senp2	NM_029457	2.10118	0.0790515
splA/ryanodine receptor domain and SOCS box containing 1	Spsb1	NM_029035	2.10108	0.166117
leukocyte tyrosine kinase	Ltk	NM_008523	2.09953	0.12223
IQ motif containing D	Iqcd	NM_029408	2.09951	0.0804657
RAD51 associated protein 1	Rad51ap1	NM_009013	2.09881	0.16991
chromodomain helicase DNA binding protein 5	Chd5	XM_196334	2.0987	0.179719
general transcription factor IIIC, polypeptide 5	Gtf3c5	NM_148928	2.09853	0.143802
cDNA sequence BC023829	BC023829	XM_135913	2.09651	0.085925
RIKEN cDNA 6030408C04 gene	6030408C04Rik	XM_126912	2.09602	0.22347
leucine rich repeat containing 45	Lrrc45	NM_153545	2.0947	0.0810919
CD83 antigen	Cd83	NM_009856	2.09422	0.115197
RD RNA-binding protein	Rdbp	NM_138580	2.09237	0.202955
mediator of RNA polymerase II transcription, subunit 18 homolog (yeast)	Med18	NM_026039	2.09219	0.072062
protein inhibitor of activated STAT 2	Pias2	AK014871	2.09204	0.0674801
pericentrin (kendrin)	Pcnt	NM_008787	2.09135	0.136977
RWD domain containing 3	Rwdd3	NM_028456	2.09107	0.0962652
SPARC related modular calcium binding 1	Smoc1	NM_022316	2.08965	0.257162
cleavage stimulation factor, 3' pre-RNA, subunit 3	Cstf3	NM_145529	2.08928	0.063618
glypican 3	Gpc3	NM_016697	2.08821	0.0961037
FCH and double SH3 domains 2	Fchsd2	NM_199012	2.08773	0.0559045
UHRF1 (ICBP90) binding protein 1-like	Uhrf1bp1l	NM_029166	2.08772	0.0996198
Fc receptor, IgG, low affinity IIb	Fcgr2b	NM_010187	2.08761	0.350369
T-cell acute lymphocytic leukemia 2	Tal2	NM_009317	2.0851	0.100737
INO80 complex subunit B	Ino80b	NM_023547	2.08338	0.0896372
WD repeat and FYVE domain containing 2	Wdfy2	NM_175546	2.08195	0.0678494
NIMA (never in mitosis gene a)-related expressed kinase 11	Nek11	NM_172461	2.07893	0.0619117
RIKEN cDNA 2310061J03 gene	2310061J03Rik	NM_133677	2.0789	0.0867055
protein tyrosine phosphatase, non-receptor type 22 (lymphoid)	Ptpn22	NM_008979	2.07753	0.391853
receptor (calcitonin) activity modifying protein 1	Ramp1	NM_016894	2.07653	0.125077
Traf and Tnf receptor associated protein	Ttrap	NM_019551	2.07617	0.145479
gene trap locus 3	Gtl3	NM_008187	2.07538	0.117356
RIKEN cDNA 1700021K02 gene	1700021K02Rik	NM_023064	2.0731	0.137546
IQ motif containing C	Iqcc	NM_198026	2.07286	0.0841042
family with sequence similarity 164, member C	Fam164c	NM_172414	2.07273	0.156992
amyotrophic lateral sclerosis 2 (juvenile) homolog (human)	Als2	NM_028717	2.07247	0.0742277
		XM_355095	2.07244	0.089958
		XM_485382	2.07237	0.0529323
glycosyltransferase 8 domain containing 1	Glt8d1	NM_029626	2.07061	0.066028
insulin induced gene 1	Insig1	NM_153526	2.07	0.147669
centromere protein O	Cenpo	NM_134046	2.06986	0.0563496
formin binding protein 1	Fnbp1	NM_019406	2.06693	0.212594
purinergic receptor P2X, ligand-gated ion channel, 3	P2rx3	NM_145526	2.06608	0.110242
chymotrypsin C (caldecrin)	Ctrc	XM_355529	2.06519	0.0841042
anthrax toxin receptor 2	Antxr2	NM_133738	2.06372	0.107167
DNA segment, Chr 2, Wayne State University 81, expressed	D2Wsu81e	NM_172660	2.06304	0.0490531
transmembrane protein 48	Tmem48	NM_028355	2.06298	0.200143
TSPY-like 4	Tspyl4	NM_030203	2.06114	0.106389
dystrophia myotonica-containing WD repeat motif	Dmwd	NM_010058	2.05923	0.079199
isoamyl acetate-hydrolyzing esterase 1 homolog (S. cerevisiae)	Iah1	NM_026347	2.05887	0.0876119
DnaJ (Hsp40) homolog, subfamily B, member 12	Dnajb12	NM_019965	2.05812	0.0798593
component of Sp100-rs	Csprs	NM_033616	2.05718	0.12223
genetic suppressor element 1	Gse1	NM_198671	2.05639	0.0946339
interleukin 3 receptor, alpha chain	Il3ra	NM_008369	2.0552	0.0670525
ring finger protein 157	Rnf157	XM_126776	2.05515	0.190024
		NM_177255	2.05386	0.0440826
cyclin K	Ccnk	NM_009832	2.05341	0.0987252
cell cycle related kinase	Ccrk	NM_053180	2.0523	0.0582164
proteasome (prosome, macropain) assembly chaperone 2	Psmg2	NM_134138	2.05204	0.0980326
complement factor B	Cfb	NM_008198	2.04843	0.254339
tubulin, alpha 3B	Tuba3b	NM_009449	2.04548	0.0763655
cancer susceptibility candidate 1	Casc1	NM_177222	2.045	0.0599434
caveolin 2	Cav2	NM_016900	2.04476	0.0896983
leucine zipper transcription factor-like 1	Lztfl1	NM_033322	2.04355	0.0710972
ankyrin repeat and SOCS box-containing 13	Asb13	NM_080857	2.04324	0.0684816
haloacid dehalogenase-like hydrolase domain containing 3	Hdhd3	NM_024257	2.04257	0.0835759
atonal homolog 8 (Drosophila)	Atoh8	NM_153778	2.04252	0.159115
RIKEN cDNA 6330416G13 gene	6330416G13Rik	NM_144905	2.04237	0.175059
membrane associated guanylate kinase, WW and PDZ domain containing 1	Magi1	NM_010367	2.04163	0.0966019
tripartite motif-containing 16	Trim16	NM_053169	2.04159	0.101708
exocyst complex component 6	Exoc6	NM_175353	2.03907	0.187313
meiotic nuclear divisions 1 homolog (S. cerevisiae)	Mnd1	NM_029797	2.03877	0.0829357
epsilon-tubulin 1	Tube1	XM_125543	2.03837	0.185089
transmembrane protein 19	Tmem19	NM_133683	2.03819	0.122912
Ras association (RalGDS/AF-6) domain family member 4	Rassf4	NM_178045	2.03797	0.320653
methyl-CpG binding domain protein 1	Mbd1	NM_013594	2.03745	0.180179
expressed sequence AI842396	AI842396	NM_213729	2.03741	0.131737
Tnf receptor-associated factor 3	Traf3	NM_011632	2.03726	0.123662
Yamaguchi sarcoma viral (v-yes) oncogene homolog 1	Yes1	NM_009535	2.03661	0.0963251
membrane associated guanylate kinase, WW and PDZ domain containing 3	Magi3	NM_133853	2.03622	0.13341
galactokinase 1	Galk1	NM_016905	2.03576	0.161922
N-glycanase 1	Ngly1	NM_021504	2.03484	0.0853792
BCL2-related ovarian killer protein	Bok	NM_016778	2.03428	0.14453
ORAI calcium release-activated calcium modulator 2	Orai2	NM_178751	2.03404	0.065272
		NM_021898	2.03395	0.0992883
solute carrier family 35, member E3	Slc35e3	NM_029875	2.03206	0.0730855
spinster homolog 1 (Drosophila)	Spns1	NM_023712	2.03074	0.0589956
mitochondrial ribosomal protein S17	Mrps17	NM_025450	2.0302	0.164719
tubulin tyrosine ligase-like 1	Ttll1	NM_178869	2.02968	0.136974
structural maintenance of chromosomes 5	Smc5	NM_153808	2.02925	0.176974
guanosine monophosphate reductase	Gmpr	NM_025508	2.02872	0.129069
		NM_207533	2.02777	0.110847
		XM_483975	2.02759	0.118506
dynein light chain Tctex-type 1D	Dynlt1b	NM_009342	2.02739	0.2888
mucin 4	Muc4	NM_080457	2.02647	0.19363
phosphodiesterase 6H, cGMP-specific, cone, gamma	Pde6h	NM_023898	2.02612	0.153828
WD repeat domain 76	Wdr76	XM_357252	2.02592	0.141037
		NC_002512	2.02567	0.136427
GTPase activating protein (SH3 domain) binding protein 2	G3bp2	NM_011816	2.02452	0.111624
RIKEN cDNA 3110082I17 gene	3110082I17Rik	NM_028469	2.02448	0.0798593
RAB28, member RAS oncogene family	Rab28	XM_132086	2.02443	0.112057
ADP-ribosylation factor GTPase activating protein 3	Arfgap3	NM_025445	2.02431	0.0589308
protein interacting with C kinase 1	Pick1	NM_008837	2.02416	0.0786263
RIKEN cDNA 1600027N09 gene	1600027N09Rik	XM_130743	2.02314	0.161451
		XM_484269	2.02228	0.117403
methyltransferase 5 domain containing 1	Mett5d1	NM_029790	2.02216	0.0916689
DEAD (Asp-Glu-Ala-Asp) box polypeptide 19a	Ddx19a	NM_007916	2.02176	0.127282
zinc finger protein 263	Zfp263	NM_148924	2.02156	0.0990514
RIKEN cDNA 3110009E18 gene	3110009E18Rik	NM_028439	2.02029	0.0986566
polyhomeotic-like 1 (Drosophila)	Phc1	NM_007905	2.0201	0.073499
		XM_110121	2.01822	0.106217
phospholipase A2, group IB, pancreas	Pla2g1b	NM_011107	2.01777	0.12515
M-phase phosphoprotein 9	Mphosph9	XM_194241	2.01635	0.122423
DnaJ (Hsp40) homolog, subfamily C, member 22	Dnajc22	NM_176835	2.01586	0.154869
four and a half LIM domains 2	Fhl2	NM_010212	2.01527	0.122787
hairy and enhancer of split 6 (Drosophila)	Hes6	NM_019479	2.01449	0.117403
RAD17 homolog (S. pombe)	Rad17	NM_011233	2.01432	0.0887214
gene model 1631, (NCBI)	Gm1631	NM_201366	2.01335	0.122842
myotubularin related protein 6	Mtmr6	NM_144843	2.01249	0.215562
PDZ binding kinase	Pbk	NM_023209	2.0114	0.148986
		XM_128129	2.01133	0.220123
OTU domain containing 7B	Otud7b	XM_110475	2.01104	0.215791
NIPA-like domain containing 3	Npal3	XM_131773	2.01085	0.0850991
NADPH oxidase organizer 1	Noxo1	NM_027988	2.0101	0.210589
CDC42 small effector 2	Cdc42se2	NM_178626	2.00997	0.252038
RIKEN cDNA 4930549C01 gene	4930549C01Rik	NM_026300	2.00959	0.0755553
RIKEN cDNA 4931423N10 gene	4931423N10Rik	XM_130063	2.00682	0.109656
RIKEN cDNA 2410091C18 gene	2410091C18Rik	NM_028611	2.00593	0.0986566
acyl-CoA synthetase short-chain family member 2	Acss2	NM_019811	2.00573	0.111644
gene model 711, (NCBI)	Gm711	NM_198628	2.00504	0.0591719
		XM_135176	2.0046	0.196458
flotillin 1	Flot1	NM_008027	2.00384	0.0688596
phospholipase A2, group VI	Pla2g6	NM_016915	2.00365	0.0854853
CD36 antigen	Cd36	NM_007643	2.00244	0.249008
RIKEN cDNA 0610037D15 gene	0610037D15Rik	NM_026714	2.00228	0.063405
dynein, axonemal, heavy chain 5	Dnahc5	NM_133365	2.00205	0.117342
kelch-like 8 (Drosophila)	Klhl8	NM_178741	2.00128	0.134294
WD repeat domain, phosphoinositide interacting 1	Wipi1	NM_145940	2.00053	0.247785
EF-hand calcium binding domain 2	Efcab2	NM_026626	2.00038	0.104228
brain abundant, membrane attached signal protein 1	Basp1	NM_027395	2.00009	0.124575
RIKEN cDNA 2900010J23 gene	2900010J23Rik	NM_175190	1.99894	0.0789376
quiescin Q6 sulfhydryl oxidase 2	Qsox2	NM_153559	1.99781	0.061195
		XM_484105	1.99709	0.129577
Wilms tumor 1 homolog	Wt1	NM_144783	1.99654	0.392446
nidogen 2	Nid2	NM_008695	1.99473	0.470774
histone cluster 1, H4h	Hist1h4h	NM_153173	1.99471	0.0772217
ABI gene family, member 3	Abi3	NM_025659	1.99337	0.237675
isoprenylcysteine carboxyl methyltransferase	Icmt	NM_133788	1.99285	0.0696324
GLE1 RNA export mediator (yeast)	Gle1	XM_130106	1.99274	0.0815933
BCL2-associated agonist of cell death	Bad	NM_007522	1.99257	0.0838559
ornithine decarboxylase antizyme 2	Oaz2	NM_010952	1.99122	0.134935
		XM_486270	1.99109	0.0783386
RIKEN cDNA 2010007H12 gene	2010007H12Rik	NM_027242	1.9892	0.100981
active BCR-related gene	Abr	NM_198018	1.98659	0.0669413
serine/threonine kinase 19	Stk19	NM_019442	1.98623	0.0740165
dynein, axonemal, light chain 1	Dnalc1	XM_356594	1.9855	0.0749804
Ewing sarcoma breakpoint region 1	Ewsr1	NM_007968	1.98456	0.16873
crystallin, zeta (quinone reductase)-like 1	Cryzl1	NM_133679	1.98449	0.0778974
transmembrane protein 175	Tmem175	NM_028223	1.98436	0.0635037
citrate lyase beta like	Clybl	NM_029556	1.98401	0.110174
centrosomal protein 350	Cep350	XM_129509	1.98362	0.129745
eukaryotic translation initiation factor 2B, subunit 4 delta	Eif2b4	NM_010122	1.98327	0.115364
		NM_013670	1.98308	0.0858655
inner membrane protein, mitochondrial	Immt	NM_029673	1.98278	0.0826181
ectonucleoside triphosphate diphosphohydrolase 7	Entpd7	NM_053103	1.98277	0.126954
heterogeneous nuclear ribonucleoprotein L-like	Hnrpll	NM_144802	1.98226	0.0859985
tubby-like protein 3	Tulp3	NM_011657	1.98036	0.209518
acylphosphatase 2, muscle type	Acyp2	NM_029344	1.98	0.0717125
cDNA sequence BC021891	BC021891	NM_145608	1.97976	0.127812
regulator of G-protein signaling 11	Rgs11	XM_128488	1.9789	0.111574
zinc finger protein 334	Zfp334	NM_178411	1.97817	0.0998141
		NM_013649	1.97751	0.191541
DEXH (Asp-Glu-X-His) box polypeptide 58	Dhx58	BC029209	1.97644	0.157304
		XM_489138	1.9757	0.0842642
flavin containing monooxygenase 5	Fmo5	NM_010232	1.97543	0.144627
solute carrier family 15, member 3	Slc15a3	NM_023044	1.97526	0.0857009
family with sequence similarity 54, member B	Fam54b	NM_029759	1.97498	0.171852
RIKEN cDNA A830073O21 gene	A830073O21Rik	NM_177118	1.97491	0.118266
H1 histone family, member X	H1fx	NM_198622	1.9743	0.104491
GTPase activating protein (SH3 domain) binding protein 2	G3bp2	NM_011816	1.97339	0.105806
		XM_485461	1.97261	0.154121
tubulin tyrosine ligase-like family, member 3	Ttll3	NM_133923	1.96885	0.0963481
methylmalonic aciduria cblC type, with homocystinuria	Mmachc	NM_025962	1.96873	0.103956
RIKEN cDNA 2410091C18 gene	2410091C18Rik	NM_028611	1.96793	0.0867883
		XM_484445	1.96677	0.0789376
RIB43A domain with coiled-coils 2	Ribc2	XM_283290	1.96599	0.159472
kinesin family member 3B	Kif3b	NM_008444	1.96553	0.133984
protein phosphatase 4, regulatory subunit 4	Ppp4r4	NM_028980	1.96468	0.0906474
centrosomal protein 72	Cep72	NM_028959	1.96334	0.0876119
histone cluster 1, H2bf	Hist1h2bf	NM_178195	1.9624	0.244656
growth arrest specific 2	Gas2	NM_008087	1.96171	0.354683
cysteinyl-tRNA synthetase	Cars	NM_013742	1.96124	0.139801
kelch domain containing 10	Klhdc10	XM_133019	1.96101	0.107756
killer cell lectin-like receptor subfamily B member 1F	Klrb1f	NM_181064	1.95938	0.113044
neurexin III	Nrxn3	NM_172544	1.95919	0.165069
		NM_153158	1.95769	0.223535
exoribonuclease 1	Eri1	NM_026067	1.95765	0.214288
lipoic acid synthetase	Lias	NM_024471	1.95639	0.109659
interferon-induced protein 44	Ifi44	NM_133871	1.9561	0.377517
EMI domain containing 2	Emid2	NM_024474	1.95565	0.0943996
transforming growth factor, beta receptor III	Tgfbr3	NM_011578	1.95415	0.398363
DNA binding protein with his-thr domain	Dbpht2	NM_198866	1.95363	0.141678
glutamate oxaloacetate transaminase 1, soluble	Got1	NM_010324	1.9536	0.261256
RNA (guanine-9-) methyltransferase domain containing 2	Rg9mtd2	NM_175389	1.95346	0.0999357
S-phase kinase-associated protein 2 (p45)	Skp2	AK032979	1.95325	0.127646
Ral GEF with PH domain and SH3 binding motif 2	Ralgps2	NM_023884	1.95279	0.23372
		NM_176962	1.9525	0.274612
four and a half LIM domains 4	Fhl4	NM_010214	1.9521	0.216061
metal response element binding transcription factor 2	Mtf2	NM_013827	1.95194	0.190453
RIKEN cDNA 1200016B10 gene	1200016B10Rik	NM_025819	1.95127	0.134637
prostaglandin E synthase 3 (cytosolic)	Ptges3	NM_019766	1.95121	0.207632
cell death-inducing DNA fragmentation factor, alpha subunit-like effector A	Cidea	NM_007702	1.95076	0.106429
apolipoprotein B mRNA editing enzyme, catalytic polypeptide-like 4 (putative)	Apobec4	XM_355245	1.94977	0.091128
phosphatidylinositol glycan anchor biosynthesis, class T	Pigt	NM_133779	1.94812	0.11634
DEAH (Asp-Glu-Ala-His) box polypeptide 16	Dhx16	NM_026987	1.94773	0.109876
PTEN induced putative kinase 1	Pink1	NM_026880	1.94705	0.125688
zinc finger protein 11	Zfp11	NM_172462	1.94693	0.0919941
mediator complex subunit 1	Med1	NM_134027	1.94624	0.0856236
PRP40 pre-mRNA processing factor 40 homolog B (yeast)	Prpf40b	NM_018786	1.94534	0.0887115
RAP2C, member of RAS oncogene family	Rap2c	NM_172413	1.94408	0.094502
neurocan	Ncan	NM_007789	1.94394	0.13329
GRIP and coiled-coil domain containing 2	Gcc2	XM_358303	1.94342	0.0897858
		XM_133997	1.94244	0.0733652
forkhead box P1	Foxp1	NM_053202	1.94096	0.0902667
male-specific lethal 3 homolog (Drosophila)	Msl3	NM_010832	1.94071	0.0818359
cyclin-dependent kinase inhibitor 1C (P57)	Cdkn1c	NM_009876	1.93988	0.181425
cDNA sequence BC046404	BC046404	NM_198861	1.9395	0.278145
		XM_355478	1.93873	0.327417
melanoma associated antigen (mutated) 1	Mum1	NM_023431	1.93719	0.127646
RIKEN cDNA 2310015B20 gene	2310015B20Rik	XM_483917	1.93651	0.165482
microtubule-associated protein, RP/EB family, member 3	Mapre3	NM_133350	1.93545	0.130934
abl-interactor 2	Abi2	NM_198127	1.93536	0.101073
zinc finger, HIT domain containing 2	Znhit2	NM_013859	1.93533	0.165482
plexin B3	Plxnb3	NM_019587	1.93497	0.256998
non-metastatic cells 5, protein expressed in (nucleoside-diphosphate kinase)	Nme5	NM_080637	1.93486	0.545746
		XM_484441	1.93375	0.08322
U2 small nuclear RNA auxiliary factor 1-like 4	U2af1l4	NM_170760	1.93346	0.1133
		XM_488673	1.93274	0.133548
tubulin, alpha 1B	Tuba1b	NM_011654	1.93258	0.167425
microfibrillar-associated protein 1A	Mfap1a	NM_026220	1.93254	0.100981
teratocarcinoma-derived growth factor 1	Tdgf1	NM_011562	1.93172	0.138995
dpy-19-like 3 (C. elegans)	Dpy19l3	NM_178704	1.93084	0.104664
FBJ osteosarcoma oncogene B	Fosb	NM_008036	1.93037	0.303199
family with sequence similarity 120, member B	Fam120b	NM_024203	1.93029	0.0830117
centromere protein I	Cenpi	NM_145924	1.92995	0.198222
RIKEN cDNA 2010109I03 gene	2010109I03Rik	NM_025929	1.92843	0.131167
engulfment and cell motility 1, ced-12 homolog (C. elegans)	Elmo1	NM_080288	1.92824	0.144884
NIMA (never in mitosis gene a)-related expressed kinase 4	Nek4	NM_011849	1.92784	0.11663
G protein-coupled receptor 137	Gpr137	NM_207220	1.92678	0.133228
zinc fingers and homeoboxes 3	Zhx3	NM_177263	1.92548	0.161288
RIKEN cDNA 1700019E19 gene	1700019E19Rik	NM_029601	1.92491	0.291434
FUS interacting protein (serine-arginine rich) 1	Fusip1	NM_010178	1.92429	0.0904655
RIKEN cDNA 4930444P10 gene	4930444P10Rik	XM_129706	1.92365	0.136796
		NM_012005	1.92292	0.179078
cDNA sequence BC022687	BC022687	NM_145450	1.92241	0.186668
RAN guanine nucleotide release factor	Rangrf	NM_021329	1.92224	0.089958
ubiquitin-like 4	Ubl4	NM_145405	1.92073	0.0867055
tetratricopeptide repeat domain 39A	Ttc39a	NM_153392	1.92052	0.138672
SEC11 homolog C (S. cerevisiae)	Sec11c	NM_025468	1.92034	0.159115
olfactory receptor 1337	Olfr1337	NM_146309	1.92026	0.124717
kinesin family member 4	Kif4	NM_008446	1.9193	0.297269
ring finger protein 128	Rnf128	NM_023270	1.91923	0.1133
solute carrier family 35 (UDP-galactose transporter), member A2	Slc35a2	NM_078484	1.91917	0.136696
nucleoporin 210	Nup210	NM_018815	1.91879	0.341817
spastin	Spast	NM_016962	1.91811	0.22411
DNA segment, Chr 15, Wayne State University 169, expressed	D15Wsu169e	AK035479	1.91775	0.10845
CD177 antigen	Cd177	NM_026862	1.91772	0.121093
tubulin, beta 2c	Tubb2c	NM_146116	1.91645	0.334832
KISS1 receptor	Kiss1r	NM_053244	1.91584	0.149909
Scm-like with four mbt domains 1	Sfmbt1	NM_019460	1.91578	0.105915
transcription elongation factor A (SII)-like 1	Tceal1	NM_146236	1.91577	0.101304
RIKEN cDNA 4931429I11 gene	4931429I11Rik	XM_134806	1.91506	0.105188
solute carrier family 7 (cationic amino acid transporter, y+ system), member 2	Slc7a2	NM_007514	1.91482	0.175957
sorting nexin 10	Snx10	NM_028035	1.91387	0.110231
glutaminyl-tRNA synthase (glutamine-hydrolyzing)-like 1	Qrsl1	XM_125586	1.9137	0.104025
chemokine (C-C motif) ligand 1	Ccl1	NM_011329	1.91357	0.120011
G protein-coupled receptor 83	Gpr83	NM_010287	1.91352	0.392446
RIKEN cDNA 4930427A07 gene	4930427A07Rik	NM_134041	1.91345	0.115704
histone cluster 1, H2bj	Hist1h2bj	NM_178198	1.91167	0.125428
mediator of RNA polymerase II transcription, subunit 8 homolog (yeast)	Med8	NM_173719	1.91114	0.0952233
RIKEN cDNA 4930417M19 gene	4930417M19Rik	NM_177195	1.911	0.09981
serine (or cysteine) peptidase inhibitor, clade B, member 9g	Serpinb9g	NM_011455	1.91096	0.241741
SUMO/sentrin specific peptidase 2	Senp2	NM_029457	1.91046	0.198998
hydroxyprostaglandin dehydrogenase 15 (NAD)	Hpgd	NM_008278	1.91029	0.343098
mediator of RNA polymerase II transcription, subunit 8 homolog (yeast)	Med8	NM_020000	1.91007	0.169917
polymerase (DNA directed), kappa	Polk	NM_012048	1.90955	0.0812656
		AK011724	1.90931	0.151686
DnaJ (Hsp40) homolog, subfamily A, member 1	Dnaja1	NM_008298	1.90884	0.0672771
MLX interacting protein	Mlxip	NM_177582	1.90875	0.186668
growth factor receptor bound protein 10	Grb10	NM_010345	1.90856	0.440152
collagen, type IX, alpha 1	Col9a1	NM_007740	1.90811	0.113697
LY6/PLAUR domain containing 6B	Lypd6b	NM_027990	1.90757	0.215209
inositol monophosphatase domain containing 1	Impad1	NM_177730	1.9057	0.197464
vascular endothelial growth factor C	Vegfc	NM_009506	1.90536	0.322796
dermokine	Dmkn	NM_028618	1.9018	0.510608
ubiquitin specific peptidase 2	Usp2	NM_198092	1.90151	0.148736
		NM_053007	1.90117	0.18597
RIKEN cDNA D330028D13 gene	D330028D13Rik	NM_172727	1.90093	0.110294
		XM_147444	1.90069	0.086773
immature colon carcinoma transcript 1	Ict1	NM_026729	1.90006	0.0938396
CD69 antigen	Cd69	XM_132882	1.90004	0.227664
katanin p60 subunit A-like 1	Katnal1	NM_153572	1.89966	0.203244
		NM_011158	1.89857	0.141678
RIKEN cDNA 6720456H20 gene	6720456H20Rik	NM_172600	1.89849	0.112683
		NM_207267	1.89663	0.196959
fatty acid desaturase 3	Fads3	NM_021890	1.89642	0.208513
hydroxysteroid (17-beta) dehydrogenase 14	Hsd17b14	NM_025330	1.89607	0.153436
NADPH oxidase organizer 1	Noxo1	NM_027988	1.89577	0.160536
protein inhibitor of activated STAT 2	Pias2	NM_008602	1.89565	0.11663
adiponectin receptor 2	Adipor2	NM_197985	1.89522	0.181337
family with sequence similarity 60, member A	Fam60a	NM_019643	1.89373	0.0998141
		NM_030555	1.89356	0.100981
		XM_128377	1.8933	0.0914983
cDNA sequence X99384	X99384	NM_013753	1.89301	0.110756
beta-carotene 15,15'-monooxygenase	Bcmo1	NM_021486	1.89226	0.188732
TBC1 domain family, member 30	Tbc1d30	XM_137322	1.89115	0.241744
GRAM domain containing 1C	Gramd1c	NM_153528	1.89067	0.288992
expressed sequence AW554918	AW554918	BC066089	1.88948	0.18709
A kinase (PRKA) anchor protein (yotiao) 9	Akap9	NM_194462	1.88651	0.136673
wingless-related MMTV integration site 5A	Wnt5a	NM_009524	1.88627	0.183268
nucleoporin 205	Nup205	XM_133073	1.88602	0.184534
HemK methyltransferase family member 1	Hemk1	NM_133984	1.88319	0.092976
cytochrome P450, family 2, subfamily s, polypeptide 1	Cyp2s1	NM_028775	1.88287	0.359328
glucose-fructose oxidoreductase domain containing 2	Gfod2	NM_027469	1.88182	0.110422
RIKEN cDNA 4930588N13 gene	4930588N13Rik	XM_132524	1.8813	0.150727
		XM_484105	1.8805	0.223113
		NM_177247	1.88045	0.128811
fragile X mental retardation, autosomal homolog 2	Fxr2	NM_011814	1.88022	0.100061
importin 4	Ipo4	NM_024267	1.88018	0.0978836
golgi SNAP receptor complex member 2	Gosr2	NM_019650	1.87977	0.19898
olfactory receptor 20	Olfr20	NM_146923	1.87964	0.196458
platelet-activating factor acetylhydrolase, isoform 1b, alpha2 subunit	Pafah1b2	NM_008775	1.8795	0.0986566
nitric oxide synthase 3, endothelial cell	Nos3	NM_008713	1.87932	0.230525
solute carrier family 25, member 33	Slc25a33	NM_027460	1.87849	0.164719
5'-nucleotidase, cytosolic III	Nt5c3	NM_026004	1.87798	0.0963251
stromal membrane-associated protein 1	Smap1	AK006817	1.87695	0.123944
RIKEN cDNA 5330431N19 gene	5330431N19Rik	NM_172639	1.8763	0.0994262
eukaryotic translation initiation factor 4E	Eif4e	NM_007917	1.87593	0.154094
RAE1 RNA export 1 homolog (S. pombe)	Rae1	NM_175112	1.87432	0.153964
RIKEN cDNA 1110032A03 gene	1110032A03Rik	NM_023483	1.87368	0.170977
transmembrane protein 39b	Tmem39b	NM_199305	1.8734	0.12708
purinergic receptor P2X, ligand-gated ion channel, 6	P2rx6	NM_011028	1.87118	0.1133
SYS1 Golgi-localized integral membrane protein homolog (S. cerevisiae)	Sys1	NM_025575	1.87066	0.103956
		XM_485595	1.87012	0.102284
RIKEN cDNA 2410091C18 gene	2410091C18Rik	NM_028611	1.8696	0.181137
enhancer of mRNA decapping 4	Edc4	NM_181594	1.86909	0.0872016
Sin3-associated polypeptide 18	Sap18	NM_009119	1.86909	0.157387
DEAD (Asp-Glu-Ala-Asp) box polypeptide 55	Ddx55	NM_026409	1.86908	0.109696
dual specificity phosphatase 4	Dusp4	NM_176933	1.86822	0.192506
bol, boule-like (Drosophila)	Boll	NM_029267	1.86674	0.112057
		NC_002512	1.86634	0.25032
doublecortin-like kinase 2	Dclk2	NM_027539	1.86629	0.211219
calcium/calmodulin-dependent protein kinase ID	Camk1d	NM_177343	1.86377	0.250132
adhesion molecule with Ig like domain 2	Amigo2	NM_178114	1.86325	0.183268
clusterin associated protein 1	Cluap1	NM_029738	1.86313	0.0874592
tripartite motif-containing 10	Trim10	NM_011280	1.86285	0.110118
superkiller viralicidic activity 2-like (S. cerevisiae)	Skiv2l	NM_021337	1.8626	0.0996245
death associated protein 3	Dap3	NM_022994	1.86252	0.111858
		XM_125771	1.86117	0.238238
ring finger protein 208	Rnf208	NM_176834	1.86097	0.182442
CDC42 small effector 2	Cdc42se2	NM_178626	1.86081	0.127646
		NM_001001798	1.86019	0.153173
transmembrane protein 71	Tmem71	NM_172514	1.86007	0.149702
angiotensin II receptor, type 1a	Agtr1a	NM_177322	1.85972	0.210138
thioredoxin domain containing 12 (endoplasmic reticulum)	Txndc12	NM_025334	1.85957	0.122685
kinetochore associated 1	Kntc1	XM_132322	1.85814	0.2888
spectrin beta 2	Spnb2	NM_009260	1.85771	0.422288
cDNA sequence BC032265	BC032265	NM_181420	1.85728	0.111769
glucosaminyl (N-acetyl) transferase 2, I-branching enzyme	Gcnt2	NM_008105	1.85633	0.180293
coiled-coil-helix-coiled-coil-helix domain containing 2	Chchd2	NM_024166	1.85604	0.0913853
mitochondrial tumor suppressor 1	Mtus1	NM_001005863	1.85581	0.152586
		XM_485408	1.85502	0.110129
Fc receptor, IgG, low affinity III	Fcgr3	NM_010188	1.85492	0.413588
		XM_485408	1.85448	0.107856
		NM_027860	1.85418	0.128873
killer cell lectin-like receptor subfamily G, member 2	Klrg2	XM_133092	1.85299	0.120872
cyclin B1	Ccnb1	NM_172301	1.85289	0.361364
pituitary tumor-transforming gene 1	Pttg1	NM_013917	1.85237	0.158764
ligand dependent nuclear receptor corepressor	Lcor	NM_172154	1.85223	0.135687
Yip1 interacting factor homolog B (S. cerevisiae)	Yif1b	XM_284281	1.85206	0.210542
spermatogenesis associated 2	Spata2	NM_170756	1.85169	0.121886
L-2-hydroxyglutarate dehydrogenase	L2hgdh	NM_145443	1.851	0.222736
tubulin tyrosine ligase-like family, member 13	Ttll13	NM_177765	1.85006	0.140325
heparan sulfate 6-O-sulfotransferase 2	Hs6st2	NM_015819	1.84948	0.20271
leucine-rich repeats and IQ motif containing 3	Lrriq3	NM_028938	1.84921	0.134335
cell cycle progression 1	Ccpg1	NM_028181	1.84879	0.104625
RIKEN cDNA 1700047I17 gene 1	1700047I17Rik1	NM_028527	1.84773	0.110174
breast cancer 1	Brca1	NM_009764	1.84622	0.345259
cysteine rich protein 2	Crip2	NM_024223	1.84607	0.181337
membrane protein, palmitoylated 5 (MAGUK p55 subfamily member 5)	Mpp5	NM_019579	1.84587	0.268563
myocyte enhancer factor 2C	Mef2c	NM_025282	1.84545	0.220504
transformation related protein 53 binding protein 1	Trp53bp1	NM_013735	1.8447	0.0995275
mediator of RNA polymerase II transcription, subunit 8 homolog (yeast)	Med8	NM_020000	1.84435	0.136427
terminal uridylyl transferase 1, U6 snRNA-specific	Tut1	NM_197993	1.84395	0.159264
oogenesin 4	Oog4	NM_173773	1.84381	0.203244
transmembrane emp24 protein transport domain containing 4	Tmed4	NM_134020	1.84326	0.094851
calcium homeostasis endoplasmic reticulum protein	Cherp	NM_138585	1.84165	0.0998141
IQ calmodulin-binding motif containing 1	Iqcb1	NM_177128	1.84164	0.117999
REX2, RNA exonuclease 2 homolog (S. cerevisiae)	Rexo2	NM_024233	1.84093	0.136696
abhydrolase domain containing 14A	Abhd14a	NM_145919	1.84078	0.0841686
testis-specific serine kinase 4	Tssk4	NM_027673	1.84068	0.100082
solute carrier family 43, member 3	Slc43a3	NM_021398	1.84013	0.162007
regulatory factor X, 3 (influences HLA class II expression)	Rfx3	NM_011265	1.83914	0.111035
cysteine and glycine-rich protein 2 binding protein	Csrp2bp	NM_181417	1.83903	0.119301
signal-induced proliferation-associated 1 like 2	Sipa1l2	XM_146572	1.83887	0.226209
Fanconi anemia, complementation group L	Fancl	NM_025923	1.83752	0.118298
protein disulfide isomerase associated 2	Pdia2	XM_128552	1.83735	0.189894
NFKB activating protein-like	Nkapl	NM_025719	1.83715	0.115364
centromere protein V	Cenpv	XM_203393	1.8367	0.123236
RIKEN cDNA 1700040I03 gene	1700040I03Rik	XM_132652	1.83647	0.254992
S-adenosylhomocysteine hydrolase-like 1	Ahcyl1	NM_145542	1.83599	0.209595
RIKEN cDNA 1500035H01 gene	1500035H01Rik	NM_023831	1.83534	0.11268
CD320 antigen	Cd320	NM_019421	1.8352	0.110422
		AK015096	1.83409	0.244656
		AJ277844	1.83298	0.168436
cytochrome P450, family 4, subfamily f, polypeptide 16	Cyp4f16	NM_024442	1.83242	0.127757
oxidized low density lipoprotein (lectin-like) receptor 1	Olr1	NM_138648	1.83139	0.271117
cyclin-dependent kinase inhibitor 1A (P21)	Cdkn1a	NM_007669	1.83064	0.20218
DOT1-like, histone H3 methyltransferase (S. cerevisiae)	Dot1l	NM_199322	1.82993	0.165482
solute carrier family 23 (nucleobase transporters), member 2	Slc23a2	NM_018824	1.82972	0.134802
		M33236	1.82946	0.25032
ghrelin	Ghrl	NM_021488	1.82941	0.0904655
doublesex and mab-3 related transcription factor like family A1	Dmrta1	NM_175647	1.82928	0.227854
PHD finger protein 10	Phf10	NM_024250	1.82868	0.251213
RIKEN cDNA 1110020G09 gene	1110020G09Rik	XM_127934	1.82858	0.23397
transformation related protein 53 binding protein 1	Trp53bp1	NM_013735	1.82848	0.183326
staufen (RNA binding protein) homolog 2 (Drosophila)	Stau2	NM_025303	1.82741	0.149294
interleukin 31	Il31	XM_132344	1.82729	0.281078
benzodiazapine receptor associated protein 1	Bzrap1	NM_172449	1.8264	0.189059
DEAD (Asp-Glu-Ala-Asp) box polypeptide 27	Ddx27	NM_153065	1.82618	0.214617
Rho-related BTB domain containing 1	Rhobtb1	XM_125637	1.82558	0.261194
tetraspanin 13	Tspan13	NM_025359	1.82436	0.11055
WD repeat domain, phosphoinositide interacting 1	Wipi1	NM_145940	1.82336	0.202498
microtubule-associated protein, RP/EB family, member 1	Mapre1	NM_007896	1.82283	0.16991
		XM_129867	1.82254	0.115364
cysteine-rich secretory protein LCCL domain containing 2	Crispld2	NM_030209	1.82247	0.21623
GPN-loop GTPase 2	Gpn2	NM_133884	1.82243	0.195385
schlafen 4	Slfn4	NM_011410	1.82189	0.441998
solute carrier family 4 (anion exchanger), member 8	Slc4a8	NM_021530	1.82078	0.169136
dual-specificity tyrosine-(Y)-phosphorylation regulated kinase 4	Dyrk4	NM_207210	1.82076	0.157364
peroxisomal biogenesis factor 11 beta	Pex11b	NM_011069	1.82037	0.167666
		XM_111900	1.8203	0.112249
nucleobindin 2	Nucb2	NM_016773	1.81598	0.115169
RIKEN cDNA 1700030K09 gene	1700030K09Rik	NM_028170	1.81592	0.11557
		NM_175281	1.81517	0.206169
N-acyl phosphatidylethanolamine phospholipase D	Napepld	NM_178728	1.81404	0.156241
jumonji, AT rich interactive domain 1C (Rbp2 like)	Jarid1c	NM_013668	1.814	0.285788
guanine nucleotide binding protein, alpha 11	Gna11	NM_010301	1.81352	0.21613
transmembrane serine protease 7	Tmprss7	NM_172455	1.81349	0.26973
F-box and leucine-rich repeat protein 12	Fbxl12	NM_013911	1.8132	0.118685
excision repair cross-complementing rodent repair deficiency complementation group 6 - like	Ercc6l	NM_146235	1.81308	0.178923
solute carrier family 1 (glial high affinity glutamate transporter), member 2	Slc1a2	NM_011393	1.81289	0.258163
WD repeat domain 77	Wdr77	NM_027432	1.81217	0.128963
coenzyme Q4 homolog (yeast)	Coq4	NM_178693	1.81167	0.109264
aggrecan	Acan	NM_007424	1.81091	0.216481
chromodomain helicase DNA binding protein 1-like	Chd1l	NM_026539	1.80999	0.130366
		NM_207530	1.80985	0.134294
		XM_131380	1.8097	0.1757
		NM_026339	1.80923	0.143857
S100 protein, beta polypeptide, neural	S100b	NM_009115	1.80913	0.103989
CLP1, cleavage and polyadenylation factor I subunit, homolog (S. cerevisiae)	Clp1	NM_133840	1.80882	0.103776
regulator of G-protein signaling 9	Rgs9	NM_011268	1.80874	0.220441
limb-bud and heart	Lbh	NM_029999	1.80812	0.196365
sterile alpha motif domain containing 10	Samd10	NM_172676	1.80807	0.122499
tuberous sclerosis 2	Tsc2	NM_011647	1.80774	0.498397
		XM_359229	1.80728	0.148128
PC4 and SFRS1 interacting protein 1	Psip1	NM_133948	1.80712	0.219802
DNA segment, Chr 14, ERATO Doi 449, expressed	D14Ertd449e	NM_025311	1.80636	0.136696
WD repeat domain 47	Wdr47	NM_181400	1.80635	0.120251
SET domain containing 4	Setd4	NM_145482	1.80339	0.144161
RIKEN cDNA D230025D16 gene	D230025D16Rik	NM_145604	1.80313	0.3857
Bardet-Biedl syndrome 1 (human)	Bbs1	XM_355129	1.80253	0.151991
RIKEN cDNA D630039A03 gene	D630039A03Rik	NM_178727	1.80214	0.129335
inositol polyphosphate phosphatase-like 1	Inppl1	NM_010567	1.802	0.14089
transmembrane protein 44	Tmem44	NM_172614	1.80185	0.197947
three prime repair exonuclease 1	Trex1	NM_011637	1.80037	0.153828
RIKEN cDNA 3110062M04 gene	3110062M04Rik	NM_199145	1.79859	0.15504
amnionless	Amn	NM_033603	1.79797	0.127582
syntaxin 2	Stx2	NM_007941	1.79754	0.197343
interleukin 18 receptor 1	Il18r1	NM_008365	1.79752	0.382302
heat shock protein 4	Hspa4	NM_008300	1.79683	0.293282
MAP-kinase activating death domain	Madd	BC042212	1.79677	0.207632
expressed sequence AI467606	AI467606	NM_178901	1.79664	0.182855
zinc finger protein 7	Zfp7	NM_145916	1.79662	0.145417
glutamate receptor interacting protein 1	Grip1	NM_028736	1.79493	0.126573
macrophage galactose N-acetyl-galactosamine specific lectin 2	Mgl2	NM_145137	1.79458	0.254992
opioid receptor, kappa 1	Oprk1	NM_011011	1.79349	0.183326
DALR anticodon binding domain containing 3	Dalrd3	NM_026378	1.79324	0.212537
beta-transducin repeat containing protein	Btrc	NM_009771	1.79311	0.128316
beta-1,3-glucuronyltransferase 1 (glucuronosyltransferase P)	B3gat1	NM_029792	1.79297	0.111508
RIKEN cDNA 2700033N17 gene	2700033N17Rik	AK012325	1.79215	0.165482
EF-hand calcium binding domain 2	Efcab2	NM_026626	1.79191	0.175957
sphingosine-1-phosphate receptor 1	S1pr1	NM_007901	1.7899	0.347372
UTP18, small subunit (SSU) processome component, homolog (yeast)	Utp18	XM_109904	1.78979	0.111508
UDP-Gal:betaGlcNAc beta 1,3-galactosyltransferase, polypeptide 4	B3galt4	NM_019420	1.78929	0.104274
coilin	Coil	NM_016706	1.7891	0.20271
FLYWCH-type zinc finger 1	Flywch1	NM_153791	1.78879	0.120453
synaptonemal complex central element protein 2	Syce2	NM_027954	1.78773	0.275129
GDNF-inducible zinc finger protein 1	Gzf1	NM_028986	1.78734	0.20218
		XM_485965	1.78657	0.236071
		XM_489508	1.78636	0.144884
family with sequence similarity 131, member A	Fam131a	NM_133778	1.78612	0.209595
Zwilch, kinetochore associated, homolog (Drosophila)	Zwilch	NM_026507	1.78576	0.25934
mindbomb homolog 2 (Drosophila)	Mib2	NM_145124	1.78543	0.164576
SHQ1 homolog (S. cerevisiae)	Shq1	NM_181590	1.78495	0.10439
choline kinase beta	Chkb	NM_007692	1.78491	0.200589
TAF11 RNA polymerase II, TATA box binding protein (TBP)-associated factor	Taf11	NM_026836	1.78461	0.152811
tripartite motif-containing 68	Trim68	NM_198012	1.78458	0.100082
tumor necrosis factor receptor superfamily, member 19	Tnfrsf19	NM_013869	1.78398	0.22114
		NM_028842	1.78372	0.141033
serine racemase	Srr	NM_013761	1.78365	0.128136
		XM_488997	1.78291	0.211772
Kruppel-like factor 2 (lung)	Klf2	NM_008452	1.78216	0.206634
family with sequence similarity 164, member A	Fam164a	NM_173181	1.78215	0.1133
		NM_008195	1.78192	0.176154
alanine-glyoxylate aminotransferase	Agxt	NM_016702	1.78172	0.119881
bromodomain, testis-specific	Brdt	NM_054054	1.78086	0.214617
CD53 antigen	Cd53	NM_007651	1.78037	0.539668
		NM_027507	1.7802	0.224085
insulin-like growth factor 1	Igf1	NM_010512	1.7797	0.366077
TATA box binding protein (Tbp)-associated factor, RNA polymerase I, A	Taf1a	NM_021466	1.77881	0.106389
carnitine palmitoyltransferase 2	Cpt2	NM_009949	1.77876	0.163416
zinc finger CCCH type containing 3	Zc3h3	NM_172121	1.77833	0.194531
Morf4 family associated protein 1	Mrfap1	NM_026242	1.77797	0.130366
RIKEN cDNA B230219D22 gene	B230219D22Rik	NM_181278	1.77785	0.22109
leucine rich repeat and coiled-coil domain containing 1	Lrrcc1	NM_028915	1.77736	0.108666
		XM_488673	1.77693	0.160352
homeodomain leucine zipper-encoding gene	Homez	NM_183174	1.77675	0.198103
heterogeneous nuclear ribonucleoprotein A2/B1	Hnrnpa2b1	NM_182650	1.77663	0.106507
histone cluster 1, H2bp	Hist1h2bp	NM_178202	1.7766	0.13245
protein tyrosine phosphatase, non-receptor type 22 (lymphoid)	Ptpn22	NM_008979	1.77659	0.378591
		NM_183088	1.77632	0.143682
guanine nucleotide binding protein-like 1	Gnal1	NM_008136	1.77541	0.155148
		XM_132006	1.77486	0.143365
mitochondrial ribosomal protein L39	Mrpl39	NM_017404	1.77476	0.171205
major facilitator superfamily domain containing 7A	Mfsd7a	NM_172883	1.77352	0.158647
leucine rich repeat containing 29	Lrrc29	NM_177449	1.77347	0.196365
beta-carotene oxygenase 2	Bco2	NM_133217	1.77302	0.150476
MAX-like protein X	Mlx	NM_011550	1.772	0.192701
tektin 3	Tekt3	XM_111038	1.77119	0.114175
zinc finger protein 300	Zfp300	NM_183185	1.77106	0.178676
		NM_175176	1.77105	0.248197
		XM_488638	1.77031	0.202537
Ral GEF with PH domain and SH3 binding motif 2	Ralgps2	NM_023884	1.76909	0.140209
spermatogenesis associated 1	Spata1	NM_027617	1.76872	0.180293
family with sequence similarity 173, member B	Fam173b	NM_026546	1.76848	0.114003
RIKEN cDNA D930001I22 gene	D930001I22Rik	NM_173397	1.76793	0.169586
PDZ domain containing 4	Pdzd4	AK084004	1.76649	0.188575
growth differentiation factor 5	Gdf5	NM_008109	1.76596	0.115704
suppressor of variegation 3-9 homolog 1 (Drosophila)	Suv39h1	NM_011514	1.76486	0.182368
CDK5 regulatory subunit associated protein 2	Cdk5rap2	NM_145990	1.76431	0.294744
transducin (beta)-like 1 X-linked	Tbl1x	NM_020601	1.76403	0.221576
choline kinase beta	Chkb	NM_007692	1.76272	0.238482
ER lipid raft associated 1	Erlin1	NM_145502	1.7627	0.153828
microspherule protein 1	Mcrs1	NM_016766	1.7627	0.227396
kinesin family member 1B	Kif1b	NM_008441	1.76215	0.159462
ring finger protein 125	Rnf125	NM_026301	1.76139	0.421716
fragile X mental retardation syndrome 1 homolog	Fmr1	NM_008031	1.76135	0.196546
SAPS domain family, member 1	Saps1	NM_172894	1.76031	0.153191
oral-facial-digital syndrome 1 gene homolog (human)	Ofd1	NM_177429	1.76008	0.170187
RIKEN cDNA 6330578E17 gene	6330578E17Rik	NM_198006	1.75999	0.319273
		NM_175330	1.75996	0.229593
family with sequence similarity 166, member B	Fam166b	NM_177377	1.75966	0.37849
zinc finger protein 462	Zfp462	NM_172867	1.75946	0.189704
neuropilin (NRP) and tolloid (TLL)-like 2	Neto2	XM_134498	1.75888	0.100992
leucine zipper-EF-hand containing transmembrane protein 2	Letm2	NM_173012	1.75782	0.140209
centromere protein L	Cenpl	XM_283661	1.75774	0.23397
RIKEN cDNA 2310008H09 gene	2310008H09Rik	NM_023197	1.75728	0.12954
carbonic anhydrase 6	Car6	NM_009802	1.75685	0.499197
SUMO/sentrin specific peptidase 3	Senp3	NM_030702	1.75594	0.168221
RIKEN cDNA 9030425E11 gene	9030425E11Rik	NM_133733	1.75504	0.415113
protein phosphatase 1, regulatory (inhibitor) subunit 2	Ppp1r2	NM_025800	1.75504	0.168027
apelin	Apln	NM_013912	1.75497	0.571629
E1A binding protein p400	Ep400	NM_029337	1.75473	0.153828
serine/threonine/tyrosine kinase 1	Styk1	NM_172891	1.75398	0.128811
RIKEN cDNA E130306D19 gene	E130306D19Rik	XM_131404	1.75389	0.251641
Rho GTPase activating protein 4	Arhgap4	NM_138630	1.75367	0.172867
DTW domain containing 1	Dtwd1	NM_026981	1.75299	0.157724
antagonist of mitotic exit network 1 homolog (S. cerevisiae)	Amn1	XM_132975	1.75267	0.230085
CD84 antigen	Cd84	NM_013489	1.75253	0.296262
microtubule associated serine/threonine kinase-like	Mastl	NM_025979	1.75152	0.146906
Fas (TNFRSF6) binding factor 1	Fbf1	NM_172571	1.75134	0.100082
synaptic nuclear envelope 1	Syne1	AK039486	1.75058	0.192993
family with sequence similarity 158, member A	Fam158a	NM_033146	1.75027	0.11485
hydroxy-delta-5-steroid dehydrogenase, 3 beta- and steroid delta-isomerase 4	Hsd3b4	NM_008294	1.75002	0.173838
RIKEN cDNA 2410141K09 gene	2410141K09Rik	NM_183119	1.74915	0.236565
StAR-related lipid transfer (START) domain containing 6	Stard6	NM_029019	1.74906	0.274465
ring finger and WD repeat domain 2	Rfwd2	NM_011931	1.74889	0.196458
estrogen-related receptor gamma	Esrrg	NM_011935	1.74826	0.234476
RIKEN cDNA 2010007H12 gene	2010007H12Rik	NM_027242	1.74783	0.165437
sushi-repeat-containing protein	Srpx	NM_016911	1.74756	0.202955
neural cell adhesion molecule 1	Ncam1	NM_010875	1.7467	0.256448
24-dehydrocholesterol reductase	Dhcr24	NM_053272	1.74668	0.174817
cyclin B1	Ccnb1	NM_172301	1.74622	0.230213
Fc receptor, IgA, IgM, high affinity	Fcamr	NM_144960	1.74567	0.282935
SGT1, suppressor of G2 allele of SKP1 (S. cerevisiae)	Sugt1	NM_026474	1.74558	0.267916
		NM_030555	1.74518	0.156992
deltex 4 homolog (Drosophila)	Dtx4	NM_172442	1.74503	0.384917
transformation related protein 73	Trp73	NM_011642	1.74477	0.377283
polycystic kidney disease 2-like 2	Pkd2l2	NM_016927	1.74465	0.12223
engulfment and cell motility 1, ced-12 homolog (C. elegans)	Elmo1	NM_198093	1.74454	0.358875
outer dense fiber of sperm tails 2	Odf2	NM_013615	1.74389	0.163804
olfactory receptor 878	Olfr878	NM_146798	1.74387	0.2165
tumor suppressor candidate 1	Tusc1	NM_026954	1.74228	0.175957
tuftelin interacting protein 11	Tfip11	NM_018783	1.74218	0.22109
polymerase (RNA) II (DNA directed) polypeptide A	Polr2a	NM_009089	1.74195	0.286219
collagen, type IX, alpha 1	Col9a1	BC038017	1.74171	0.246161
RIKEN cDNA 9030420J04 gene	9030420J04Rik	XM_146632	1.74143	0.208345
BRF2, subunit of RNA polymerase III transcription initiation factor, BRF1-like	Brf2	NM_025686	1.73901	0.164188
6-phosphofructo-2-kinase/fructose-2,6-biphosphatase 4	Pfkfb4	NM_173019	1.73887	0.16675
secernin 1	Scrn1	NM_027268	1.73881	0.238228
RIKEN cDNA 1110006O24 gene	1110006O24Rik	NM_021417	1.73856	0.125843
		XM_484088	1.73704	0.173301
		XM_283543	1.73596	0.141421
U7 snRNP-specific Sm-like protein LSM10	Lsm10	NM_138721	1.73522	0.127646
coiled-coil domain containing 130	Ccdc130	NM_026350	1.73431	0.117403
RIKEN cDNA 9530096D07 gene	9530096D07Rik	XM_144080	1.73421	0.118578
		NM_177569	1.73419	0.169266
X-prolyl aminopeptidase (aminopeptidase P) 3, putative	Xpnpep3	AK042110	1.73326	0.221835
proline-rich Gla (G-carboxyglutamic acid) polypeptide 2	Prrg2	NM_022999	1.7325	0.159115
non-metastatic cells 7, protein expressed in (nucleoside-diphosphate kinase)	Nme7	NM_138314	1.73242	0.221461
methylenetetrahydrofolate dehydrogenase (NAD+ dependent), methenyltetrahydrofolate cyclohydrolase	Mthfd2	NM_008638	1.73175	0.207403
		NM_030007	1.73174	0.132514
guanine nucleotide binding protein-like 1	Gnal1	NM_008136	1.73166	0.160352
GTP cyclohydrolase 1	Gch1	NM_008102	1.73106	0.174624
nucleoporin 88	Nup88	NM_172394	1.73095	0.149616
FAST kinase domains 1	Fastkd1	NM_177244	1.73091	0.281279
solute carrier family 15, member 3	Slc15a3	NM_023044	1.73042	0.254339
diacylglycerol kinase, epsilon	Dgke	NM_019505	1.73031	0.160635
tumor protein D52-like 2	Tpd52l2	NM_025482	1.73006	0.152785
sterile alpha motif domain containing 4B	Samd4b	NM_175021	1.72981	0.139732
Leber congenital amaurosis 5-like	Lca5l	NM_001001492	1.72973	0.164576
zinc finger and BTB domain containing 32	Zbtb32	NM_021397	1.72888	0.374448
ADP-ribosylation factor-like 8A	Arl8a	NM_026823	1.7282	0.126588
aminoadipate-semialdehyde synthase	Aass	NM_013930	1.7279	0.204725
CMRF-35-like molecule 3	Clm3	NM_199201	1.7278	0.220917
meteorin, glial cell differentiation regulator	Metrn	NM_133719	1.72773	0.212649
nephroblastoma overexpressed gene	Nov	NM_010930	1.72768	0.321053
RIKEN cDNA 4933407P14 gene	4933407P14Rik	NM_199019	1.72755	0.191196
MICAL-like 2	Micall2	NM_174850	1.72675	0.303286
DNA methyltransferase 1-associated protein 1	Dmap1	NM_023178	1.7264	0.115934
SWI/SNF related, matrix associated, actin dependent regulator of chromatin, subfamily d, member 1	Smarcd1	NM_031842	1.72609	0.233519
prostaglandin E synthase 3 (cytosolic)	Ptges3	NM_019766	1.72453	0.252421
TATA box binding protein	Tbp	NM_013684	1.72422	0.119301
MOB1, Mps One Binder kinase activator-like 2B (yeast)	Mobkl2b	NM_178061	1.7238	0.197947
amine oxidase (flavin containing) domain 2	Aof2	NM_133872	1.72327	0.211545
6-phosphofructo-2-kinase/fructose-2,6-biphosphatase 2	Pfkfb2	NM_008825	1.72218	0.143337
contactin 4	Cntn4	NM_173004 NM_007518	1.72114	0.205981
DEP domain containing 6	Depdc6	NM_145470	1.72106	0.257593
ribonucleotide reductase M2	Rrm2	NM_009104	1.71923	0.13763
coiled-coil domain containing 126	Ccdc126	NM_175098	1.71913	0.13341
protein tyrosine phosphatase, receptor type, F	Ptprf	NM_011213	1.71885	0.283074
coiled coil domain containing 88A	Ccdc88a	NM_176841	1.71872	0.39575
vacuolar protein sorting 13A (yeast)	Vps13a	AK019732	1.71817	0.300909
		XM_149245	1.71664	0.186668
carcinoembryonic antigen-related cell adhesion molecule 20	Ceacam20	XM_355868	1.71622	0.188037
checkpoint with forkhead and ring finger domains	Chfr	NM_172717	1.71618	0.138103
olfactory receptor 78	Olfr78	NM_130866	1.71604	0.219733
amiloride binding protein 1 (amine oxidase, copper-containing)	Abp1	NM_029638	1.71581	0.342751
N-acetyltransferase 14	Nat14	NM_201355	1.71551	0.205213
dynein, axonemal, heavy chain 9	Dnahc9	XM_110968	1.71535	0.130695
expressed sequence AU042671	AU042671	XM_132325	1.71535	0.196959
von Hippel-Lindau syndrome	Vhl	NM_009507	1.71459	0.172462
dishevelled associated activator of morphogenesis 2	Daam2	XM_283449	1.71453	0.240757
microtubule associated monoxygenase, calponin and LIM domain containing 1	Mical1	NM_138315	1.71273	0.362765
X-ray repair complementing defective repair in Chinese hamster cells 4	Xrcc4	NM_028012	1.71233	0.111035
cyclin-dependent kinase inhibitor 1A (P21)	Cdkn1a	NM_007669	1.71219	0.202498
Yip1 interacting factor homolog B (S. cerevisiae)	Yif1b	AK020444	1.71159	0.135481
mannose phosphate isomerase	Mpi	XM_134931	1.71141	0.15714
phosphatidylinositol glycan anchor biosynthesis, class O	Pigo	NM_020035	1.71122	0.200342
proprotein convertase subtilisin/kexin type 6	Pcsk6	XM_355911	1.71113	0.174756
mitogen-activated protein kinase kinase kinase 12	Map3k12	NM_009582	1.71091	0.176301
24-dehydrocholesterol reductase	Dhcr24	NM_053272	1.7108	0.223405
smoothelin-like 2	Smtnl2	NM_177776	1.71051	0.192397
		XM_196478	1.71043	0.713246
regulator of chromosome condensation 2	Rcc2	NM_173867	1.70918	0.183268
acyl-CoA thioesterase 2	Acot2	NM_134188	1.70917	0.320653
homeo box A3	Hoxa3	NM_010452	1.70908	0.159115
nucleoporin 93	Nup93	NM_172410	1.70827	0.214888
contactin associated protein-like 2	Cntnap2	NM_001004357	1.70809	0.100711
ARV1 homolog (yeast)	Arv1	NM_026855	1.70781	0.141678
lipase, member H	Liph	NM_153404	1.70772	0.136977
phosphodiesterase 1B, Ca2+-calmodulin dependent	Pde1b	NM_008800	1.70763	0.23858
RIKEN cDNA C730048C13 gene	C730048C13Rik	NM_177002	1.70618	0.24241
TPX2, microtubule-associated protein homolog (Xenopus laevis)	Tpx2	NM_028109	1.70612	0.297075
AMME chromosomal region gene 1-like	Ammecr1l	NM_153515	1.70583	0.167425
gene trap locus F3a	Gtlf3a	NM_025293	1.70546	0.221576
X-linked lymphocyte-regulated complex	Xlr	NM_011725	1.70513	0.608075
peptidylprolyl isomerase D (cyclophilin D)	Ppid	NM_026352	1.70509	0.141132
protein phosphatase 1, regulatory (inhibitor) subunit 9A	Ppp1r9a	NM_181595	1.70489	0.286875
phosphoglycerate mutase family member 5	Pgam5	XM_132261	1.70463	0.212251
tumor necrosis factor receptor superfamily, member 8	Tnfrsf8	NM_009401	1.70452	0.199309
dpy-30 homolog (C. elegans)	Dpy30	NM_024428	1.7038	0.18167
non imprinted in Prader-Willi/Angelman syndrome 1 homolog (human)	Nipa1	NM_153578	1.70345	0.164719
dual-specificity tyrosine-(Y)-phosphorylation regulated kinase 1a	Dyrk1a	NM_007890	1.70344	0.188974
RIKEN cDNA 2410017P07 gene	2410017P07Rik	NM_026643	1.70271	0.165482
		XM_355342	1.70253	0.157407
ring finger protein 186	Rnf186	NM_025786	1.70228	0.378382
immediate early response 2	Ier2	NM_010499	1.70172	0.454732
		XM_126221	1.70172	0.186813
La ribonucleoprotein domain family, member 7	Larp7	NM_138593	1.70148	0.147226
RIKEN cDNA 4932418E24 gene	4932418E24Rik	NM_177841	1.70142	0.117999
		NM_153158	1.70101	0.197947
cell cycle progression 1	Ccpg1	NM_028181	1.70099	0.229664
collagen, type XIV, alpha 1	Col14a1	NM_181277	1.70095	0.262971
bolA-like 1 (E. coli)	Bola1	XM_131044	1.70081	0.195385
LSM12 homolog (S. cerevisiae)	Lsm12	NM_172947	1.70025	0.183461
URB1 ribosome biogenesis 1 homolog (S. cerevisiae)	Urb1	XM_489612	1.70009	0.285156
membrane-associated ring finger (C3HC4) 5	2009-03-05	NM_027314	1.69985	0.190633
RIKEN cDNA 2810021B07 gene	2810021B07Rik	NM_025479	1.69961	0.160616
zinc finger protein 295	Zfp295	NM_175428	1.69957	0.286119
RIKEN cDNA 2410022L05 gene	2410022L05Rik	NM_025556	1.69936	0.126835
CDK5 regulatory subunit associated protein 1	Cdk5rap1	NM_025876	1.69825	0.20218
ER lipid raft associated 2	Erlin2	NM_153592	1.69704	0.256137
kinesin family member 26B	Kif26b	NM_177757	1.69675	0.280325
polynucleotide kinase 3'- phosphatase	Pnkp	NM_021549	1.69638	0.175588
		XM_135223	1.69628	0.151991
Ral GEF with PH domain and SH3 binding motif 1	Ralgps1	NM_175211	1.69626	0.25032
death associated protein 3	Dap3	NM_022994	1.69612	0.144646
RIKEN cDNA 4921504E06 gene	4921504E06Rik	NM_027600	1.69609	0.148779
		XM_132006	1.69562	0.200589
		NM_133873	1.69546	0.189606
kelch-like 5 (Drosophila)	Klhl5	NM_175174	1.69545	0.278092
carboxymethylenebutenolidase-like (Pseudomonas)	Cmbl	NM_181588	1.69534	0.26973
DnaJ (Hsp40) homolog, subfamily B, member 4	Dnajb4	NM_025926	1.69487	0.185307
GPN-loop GTPase 3	Gpn3	NM_024216	1.69479	0.218396
solute carrier family 10 (sodium/bile acid cotransporter family), member 7	Slc10a7	XM_134313	1.69443	0.140652
importin 4	Ipo4	NM_024267	1.69435	0.190884
		XM_135033	1.69298	0.139801
a disintegrin and metallopeptidase domain 18	Adam18	NM_010084	1.69288	0.146442
G kinase anchoring protein 1	Gkap1	NM_019832	1.69259	0.232103
apolipoprotein L 7a	Apol7a	XM_203652	1.69241	0.199463
discs, large homolog 3 (Drosophila)	Dlg3	NM_016747	1.69226	0.172358
2-oxoglutarate and iron-dependent oxygenase domain containing 2	Ogfod2	NM_025671	1.69155	0.144652
ring finger protein 1	Ring1	NM_009066	1.69083	0.160901
		XM_489113	1.69029	0.197696
pellino 1	Peli1	NM_023324	1.68942	0.240511
protein phosphatase 1, regulatory subunit 10	Ppp1r10	NM_175934	1.68939	0.131445
		XM_144310	1.68931	0.183268
		NM_016761	1.68891	0.354018
zinc finger protein 161	Zfp161	NM_009547	1.68873	0.133984
cerebellin 3 precursor protein	Cbln3	NM_019820	1.68873	0.298321
COP9 (constitutive photomorphogenic) homolog, subunit 5 (Arabidopsis thaliana)	Cops5	NM_013715	1.6886	0.198703
tankyrase, TRF1-interacting ankyrin-related ADP-ribose polymerase	Tnks	NM_175091	1.68837	0.210857
transformation related protein 53 binding protein 2	Trp53bp2	NM_173378	1.68817	0.161315
neuronal PAS domain protein 4	Npas4	NM_153553	1.68741	0.181425
torsin family 3, member A	Tor3a	NM_023141	1.68695	0.165482
DNA segment, Chr 19, ERATO Doi 737, expressed	D19Ertd737e	NM_029648	1.68693	0.210589
tropomodulin 4	Tmod4	NM_016712	1.68661	0.173262
chloride channel calcium activated 4	Clca4	NM_139148	1.68584	0.487458
		NM_175350	1.68504	0.175115
Josephin domain containing 2	Josd2	NM_025368	1.68453	0.297269
tripartite motif-containing 37	Trim37	NM_197987	1.68447	0.208345
catenin beta interacting protein 1	Ctnnbip1	NM_023465	1.68413	0.26973
mindbomb homolog 1 (Drosophila)	Mib1	NM_144860	1.68351	0.203273
G protein-coupled receptor kinase 4	Grk4	NM_019497	1.68329	0.368453
phospholipase C, zeta 1	Plcz1	NM_054066	1.68305	0.224085
coiled-coil domain containing 21	Ccdc21	NM_144527	1.68264	0.206086
protoporphyrinogen oxidase	Ppox	NM_008911	1.68153	0.11663
WNT1 inducible signaling pathway protein 1	Wisp1	NM_018865	1.68146	0.228864
POU domain, class 5, transcription factor 1	Pou5f1	NM_013633	1.68138	0.216481
ATPase, Ca++ transporting, cardiac muscle, slow twitch 2	Atp2a2	NM_009722	1.68099	0.164443
ectonucleoside triphosphate diphosphohydrolase 5	Entpd5	NM_007647	1.68027	0.241274
protein kinase C, beta	Prkcb	BC038148	1.68011	0.560135
EH domain binding protein 1-like 1	Ehbp1l1	NM_053252	1.67969	0.295384
RIKEN cDNA 4930550C14 gene	4930550C14Rik	NM_029247	1.6793	0.344351
signal-induced proliferation-associated 1 like 1	Sipa1l1	NM_172579	1.67892	0.220217
B9 protein domain 1	B9d1	NM_013717	1.6783	0.454038
transmembrane protein 38B	Tmem38b	NM_028053	1.67814	0.223535
mitotic arrest deficient 1-like 1	Mad1l1	NM_010752	1.67715	0.22359
REX2, RNA exonuclease 2 homolog (S. cerevisiae)	Rexo2	NM_024233	1.67708	0.21623
		NM_008848	1.67678	0.193517
proteasome (prosome, macropain) 26S subunit, non-ATPase, 9	Psmd9	NM_026000	1.67654	0.151991
RIKEN cDNA 1110008J03 gene	1110008J03Rik	NM_029096	1.67626	0.154281
		XM_488952	1.67624	0.310095
phosphatidylinositol transfer protein, membrane-associated 1	Pitpnm1	NM_008851	1.67596	0.235016
GRAM domain containing 1B	Gramd1b	NM_172768	1.67508	0.350424
rad and gem related GTP binding protein 1	Rem1	NM_009047	1.67463	0.280938
golgi autoantigen, golgin subfamily a, 2	Golga2	NM_133852	1.67367	0.159246
tyrosyl-DNA phosphodiesterase 1	Tdp1	NM_028354	1.67352	0.25644
RIKEN cDNA 1110058L19 gene	1110058L19Rik	NM_026503	1.67342	0.167666
transmembrane protein 126B	Tmem126b	XM_133645	1.67312	0.180401
Casitas B-lineage lymphoma-like 1	Cbll1	NM_134048	1.67274	0.202488
sperm associated antigen 4	Spag4	NM_139151	1.67142	0.223535
arginine vasopressin	Avp	NM_009732	1.67135	0.23951
PR domain containing 4	Prdm4	XM_125812	1.67129	0.18272
DIS3 mitotic control homolog (S. cerevisiae)-like	Dis3l	NM_001001295	1.67113	0.216481
histidine rich calcium binding protein	Hrc	NM_010473	1.67051	0.136673
serine/arginine repetitive matrix 1	Srrm1	NM_016799	1.6705	0.387488
zinc finger protein 385A	Zfp385a	NM_013866	1.66991	0.232725
monooxygenase, DBH-like 2	Moxd2	AE000663	1.66962	0.249671
ring finger protein 40	Rnf40	NM_172281	1.66901	0.174151
family with sequence similarity 132, member B	Fam132b	NM_173395	1.6686	0.112057
		XM_358863	1.66799	0.33623
activation-induced cytidine deaminase	Aicda	NM_009645	1.6678	0.270651
LIM domain binding 1	Ldb1	NM_010697	1.6676	0.280347
RIKEN cDNA 1500011H22 gene	1500011H22Rik	NM_026883	1.66744	0.180293
zinc finger protein 771	Zfp771	NM_177362	1.66705	0.284637
inositol monophosphatase domain containing 1	Impad1	NM_177730	1.66647	0.223113
		NM_177468	1.66631	0.318872
hypermethylated in cancer 2	Hic2	NM_178922	1.66627	0.290833
RIKEN cDNA 4933404M02 gene	4933404M02Rik	NM_025744	1.66598	0.208345
histone cluster 1, H2ae	Hist1h2ae	NM_178187	1.66463	0.322796
glyoxalase domain containing 4	Glod4	NM_026029	1.66453	0.149007
major histocompatibility complex, class I-related	Mr1	NM_008209	1.66306	0.115364
cell cycle related kinase	Ccrk	NM_053180	1.66231	0.14191
S-adenosylhomocysteine hydrolase-like 1	Ahcyl1	NM_145542	1.66225	0.244543
integrin alpha FG-GAP repeat containing 1	Itfg1	NM_028007	1.66216	0.149457
splicing factor, arginine/serine-rich 14	Sfrs14	NM_172755	1.66195	0.255184
ubiquitin specific peptidase 19	Usp19	NM_027804	1.66187	0.132283
		NM_207302	1.66166	0.165069
ataxin 7-like 1	Atxn7l1	NM_028139	1.66109	0.270651
homeo box A5	Hoxa5	NM_010453	1.66034	0.167425
tubulin, gamma complex associated protein 3	Tubgcp3	NM_198031	1.66032	0.190472
transient receptor potential cation channel, subfamily C, member 1	Trpc1	NM_011643	1.66026	0.25644
neuromedin B receptor	Nmbr	NM_008703	1.66009	0.230213
cDNA sequence BC038925	BC038925	NM_177878	1.66003	0.153436
B-cell translocation gene 3	Btg3	NM_009770	1.65958	0.143857
centrosomal protein 120	Cep120	NM_178686	1.65953	0.281279
X-linked lymphocyte-regulated 4B	Xlr4b	NM_021365	1.65946	0.504361
NIMA (never in mitosis gene a)-related expressed kinase 3	Nek3	NM_011848	1.65837	0.175072
dpy-30 homolog (C. elegans)	Dpy30	NM_024428	1.65782	0.176524
regulatory factor X, 4 (influences HLA class II expression)	Rfx4	AK034131	1.65726	0.299733
chloride channel 3	Clcn3	NM_007711	1.65687	0.208345
staufen (RNA binding protein) homolog 2 (Drosophila)	Stau2	NM_025303	1.65597	0.16962
		XM_484108	1.65595	0.138995
golgi SNAP receptor complex member 2	Gosr2	NM_019650	1.65522	0.224085
collagen, type VIII, alpha 2	Col8a2	NM_199473	1.65438	0.207367
mitogen-activated protein kinase 15	Mapk15	NM_177922	1.65436	0.20218
WD repeat domain 48	Wdr48	NM_026236	1.6543	0.155836
ninjurin 2	Ninj2	NM_016718	1.65388	0.191282
		NM_177349	1.65301	0.142005
fatty acid amide hydrolase	Faah	NM_010173	1.65247	0.196546
fukutin	Fktn	NM_139309	1.65246	0.188289
protein tyrosine phosphatase, receptor type, f polypeptide (PTPRF), interacting protein, alpha 1	Ppfia1	XM_133979	1.65204	0.245295
RIKEN cDNA 2410001C21 gene	2410001C21Rik	NM_025542	1.65123	0.213217
intraflagellar transport 20 homolog (Chlamydomonas)	Ift20	NM_018854	1.65067	0.216266
leucine rich repeat containing 59	Lrrc59	NM_133807	1.65046	0.203938
transmembrane protein 123	Tmem123	NM_133739	1.65027	0.198703
zinc finger CCCH type containing 6	Zc3h6	NM_178404	1.65011	0.184349
proline rich 15	Prr15	NM_030024	1.64988	0.16873
zinc finger protein 385B	Zfp385b	NM_178723	1.64964	0.205773
UDP-N-acetyl-alpha-D-galactosamine:polypeptide N-acetylgalactosaminyltransferase 1	Galnt1	NM_013814	1.64829	0.272229
glypican 1	Gpc1	NM_016696	1.6477	0.229076
methylmalonic aciduria (cobalamin deficiency) type B homolog (human)	Mmab	NM_029956	1.64767	0.234717
gene regulated by estrogen in breast cancer protein	Greb1	NM_015764	1.64721	0.315137
RIKEN cDNA 3110043O21 gene	3110043O21Rik	AK014175	1.64685	0.211854
		NM_178677	1.64662	0.160909
arrestin, beta 1	Arrb1	NM_178220	1.64653	0.254339
Suppression of tumorigenicity 7	St7	NM_022332	1.64645	0.17848
myeloid/lymphoid or mixed-lineage leukemia (trithorax homolog, Drosophila); translocated to, 3	Mllt3	NM_029931	1.64621	0.214587
hyaluronan synthase1	Has1	NM_008215	1.64619	0.241591
ADP-ribosylation factor-like 8B	Arl8b	NM_026011	1.64572	0.349367
coiled-coil domain containing 89	Ccdc89	XM_133591	1.64538	0.156841
melanoma antigen, family D, 2	Maged2	NM_030700	1.64527	0.255184
taste receptor, type 2, member 102	Tas2r102	NM_199153	1.64527	0.263456
RIKEN cDNA A230051G13 gene	A230051G13Rik	NM_173785	1.64499	0.132422
keratin 9	Krt9	NM_201255	1.6448	0.264586
GINS complex subunit 2 (Psf2 homolog)	Gins2	XM_195728	1.64451	0.402376
complement component 4B (Childo blood group)	C4b	NM_009780	1.64425	0.22347
contactin 1	Cntn1	NM_007727	1.64405	0.251472
inositol 1,3,4,5,6-pentakisphosphate 2-kinase	Ippk	NM_199056	1.6439	0.133734
taxilin alpha	Txlna	NM_001005506	1.64381	0.183268
discs, large (Drosophila) homolog-associated protein 5	Dlgap5	NM_144553	1.64345	0.238374
		XM_193637	1.64324	0.204436
		NM_173755	1.64303	0.194475
[truncated: 28,058 more rows]
