# Supplementary material for: Transcriptional Program of Ciliated Epithelial Cells Reveals New Cilium and Centrosome Components and Links to Human Disease
Source: PLoS One. 2012 Dec 31;7(12):e52166. doi: 10.1371/journal.pone.0052166 (PMC3534086; doi:10.1371/journal.pone.0052166)
Supplement: Table S5 — Overlap of the ciliated MTEC transcriptome with other proteomic, transcriptomic and genomic studies of the cilium and centrosome. (XLSX) [file pone.0052166.s005.xlsx]

## Sheet: Cilia proteome databases
Table S5. Overlap of the ciliated MTEC transcriptome with other proteomic, transcriptomic and genomic studies of the cilium and centrosome.
The Cilia Proteome (see Gherman et al., 2006, Nat Genet 38: 961-962) was searched for genes that were upregulated by at least 10-fold at ALI+4 or ALI+12 in FOXJ1:GFP+ MTECs.
Upregulated (>10-fold) in FOXJ1:GFP+ MTECs at ALI+4			Found/Not Found in study ( ’1’ indicates that the gene was identified in the indicated study) as compiled by the Cilia Proteome (see www.ciliaproteome.org)
Gene Name from ciliated MTEC transcriptome	Gene Symbol	mRNA Accession	Li et al, 2004 (C. reinhardtii)	Efimenko et al, 2005 (C. elegans)	Stolc et al, 2005 (C. reinhardtii)	Ostrowski et al, 2002 (H. sapiens)	Pazour et al, 2005 (C. reinhardtii)	Avidor-Reiss et al, 2004 (D. melanogaster)	Keller et al, 2005 (C. reinhardtii)	Andersen et al, 2003 (H. sapiens)	Blacque et al, 2005 (C. elegans)	Broadhead et al, 2006 (T. brucei)	Liu et al, 2007 (M. musculus)	Total
WD repeat domain 16	Wdr16	NM_027963	1	1	1		1	1	1	1	1	1	1	10
WD repeat domain 69	Wdr69	NM_027725		1	1	1	1	1	1	1	1	1	1	10
kinesin family member 3A	Kif3a	NM_008443	1		1	1	1	1		1	1	1	1	9
WD repeat domain 38	Wdr38	XM_484992		1	1		1	1	1	1	1	1	1	9
intraflagellar transport 81 homolog (Chlamydomonas)	Ift81	NM_009879	1	1	1		1	1		1	1	1	1	9
centrosomal protein 135	Cep135	NM_199032	1	1			1	1	1	1	1	1	1	9
tubulin, alpha 1A	Tuba1a	NM_011653		1	1	1	1		1	1	1	1	1	9
NIMA (never in mitosis gene a)-related expressed kinase 5	Nek5	NM_177898		1	1		1	1	1	1	1		1	8
thioredoxin domain containing 6	Txndc6	XM_135038	1		1	1	1		1	1		1	1	8
Microtubule associated serine/threonine kinase 3	Mast3	NM_199308		1	1		1	1	1	1	1		1	8
centrin 4	Cetn4	NM_145825		1		1	1		1	1	1	1	1	8
kinesin family member 9	Kif9	NM_010628			1	1	1	1		1	1	1	1	8
coiled-coil domain containing 41	Ccdc41	NM_029852		1		1	1	1		1	1	1	1	8
serine/threonine kinase 36 (fused homolog, Drosophila)	Stk36	NM_175031		1	1		1	1	1	1	1		1	8
coiled-coil domain containing 18	Ccdc18	XM_144475		1		1	1	1		1	1	1	1	8
polo-like kinase 4 (Drosophila)	Plk4	NM_011495		1	1		1	1	1	1	1		1	8
WD repeat domain 78	Wdr78	NM_146254	1		1	1	1	1		1		1	1	8
intraflagellar transport 74 homolog (Chlamydomonas)	Ift74	NM_026319	1		1		1	1		1		1	1	7
tetratricopeptide repeat domain 26	Ttc26	NM_153600	1	1	1	1		1			1		1	7
serine/threonine kinase 33	Stk33	XM_358897		1	1		1		1	1	1		1	7
renal tumor antigen	Rage	NM_011973		1	1		1		1	1	1		1	7
NIMA (never in mitosis gene a)-related expressed kinase 11	Nek11	NM_172461		1	1		1		1	1	1		1	7
cyclin-dependent kinase-like 1 (CDC2-related kinase)	Cdkl1	NM_183294		1	1		1		1	1	1		1	7
cyclin-dependent kinase-like 2 (CDC2-related kinase)	Cdkl2	NM_016912		1	1		1		1	1	1		1	7
kinesin family member 27	Kif27	NM_175214			1	1	1	1		1		1	1	7
dual-specificity tyrosine-(Y)-phosphorylation regulated kinase 3	Dyrk3	NM_145508		1	1		1		1	1	1		1	7
TNF receptor-associated factor 3 interacting protein 1	Traf3ip1	XM_129927	1	1	1		1	1			1		1	7
EF-hand domain (C-terminal) containing 1	Efhc1	XM_129694	1		1	1	1	1	1			1		7
dynein, axonemal, heavy chain 9	Dnahc9	XM_110968	1			1	1	1		1		1	1	7
dynein, axonemal, heavy chain 8	Dnahc8	NM_013811	1			1	1	1		1		1	1	7
RIB43A domain with coiled-coils 1	Ribc1	NM_025660	1		1	1	1	1	1			1		7
coiled-coil domain containing 39	Ccdc39	NM_026222		1		1	1			1	1	1	1	7
proviral integration site 2	Pim2	NM_138606		1			1		1	1		1	1	6
WD repeat domain 63	Wdr63	NM_172864	1		1	1	1	1				1		6
fibronectin type 3 and ankyrin repeat domains 1	Fank1	NM_025850		1	1		1				1	1	1	6
dynein, axonemal, light intermediate polypeptide 1	Dnali1	NM_175223	1		1	1	1	1				1		6
leucine rich repeat containing 48	Lrrc48	NM_029044	1		1		1	1				1	1	6
sperm associated antigen 6	Spag6	NM_015773	1		1	1	1					1	1	6
meiosis-specific nuclear structural protein 1	Mns1	NM_008613	1		1	1	1			1			1	6
ubiquitin-conjugating enzyme E2T (putative)	Ube2t	NM_026024		1			1	1			1		1	5
nephronophthisis 4 (juvenile) homolog (human)	Nphp4	NM_153424	1	1					1		1		1	5
leucine rich repeat containing 23	Lrrc23	NM_013588	1		1	1	1						1	5
leucine rich repeat containing 50	Lrrc50	NM_026648	1		1		1	1					1	5
Bardet-Biedl syndrome 5 (human)	Bbs5	NM_028284	1	1				1			1		1	5
tubulin polymerization-promoting protein family member 3	Tppp3	NM_026481	1	1				1			1		1	5
myosin, light polypeptide 4	Myl4	NM_010858		1			1				1	1	1	5
kit oncogene	Kit	NM_021099		1			1				1		1	4
ankyrin repeat domain 42	Ankrd42	NM_028665		1			1				1		1	4
coiled-coil domain containing 65	Ccdc65	NM_153518	1		1		1	1						4
Bardet-Biedl syndrome 7 (human)	Bbs7	NM_027810	1	1							1		1	4
yippee-like 1 (Drosophila)	Ypel1	NM_023249	1				1	1					1	4
coiled-coil domain containing 114	Ccdc114	XM_133435	1			1	1	1						4
centromere protein J	Cenpj	XM_127861						1		1		1	1	4
leucine-rich and death domain containing	Lrdd	NM_022654		1			1				1	1		4
coiled-coil domain containing 96	Ccdc96	NM_025725	1		1		1					1		4
leucine rich repeat containing 18	Lrrc18	NM_026253		1			1				1		1	4
RIKEN cDNA 4930451C15 gene	4930451C15Rik	XM_148428					1			1		1	1	4
RIKEN cDNA 1700026L06 gene	1700026L06Rik	XM_130129				1				1		1	1	4
Leucine rich repeat containing 34	Lrrc34	XM_487721					1			1		1	1	4
intraflagellar transport 122 homolog (Chlamydomonas)	Ift122	NM_031177	1				1						1	3
spindle assembly 6 homolog (C. elegans)	Sass6	XM_131155	1							1			1	3
cadherin-like 26	Cdh26	NM_198656		1							1		1	3
sperm associated antigen 1	Spag1	NM_012031					1	1					1	3
dual specificity phosphatase 18	Dusp18	NM_173745	1		1		1							3
MORN repeat containing 1	Morn1	XM_131829					1					1	1	3
centrosomal protein 152	Cep152	XM_130551								1		1	1	3
fibrinogen-like protein 1	Fgl1	NM_145594		1							1		1	3
RIKEN cDNA 1700008D07 gene	1700008D07Rik	XM_485969	1		1		1							3
MORN repeat containing 3	Morn3	XM_132350					1					1	1	3
hydrocephalus inducing	Hydin	NM_172916	1				1					1		3
coiled-coil domain containing 11	Ccdc11	XM_128864								1		1	1	3
transmembrane protein 67	Tmem67	NM_177861		1							1		1	3
Bardet-Biedl syndrome 9 (human)	Bbs9	NM_181316		1							1		1	3
coiled-coil domain containing 113	Ccdc113	NM_172914	1		1		1							3
RIKEN cDNA 1700019L03 gene	1700019L03Rik	XM_484987	1				1			1				3
echinoderm microtubule associated protein like 1 transcript variant 1	Eml1	XM_127139	1				1						1	3
RIKEN cDNA 4933434I06 gene	4933434I06Rik	XM_283704	1		1		1							3
RIKEN cDNA 1190002A17 gene	1190002A17Rik	XM_130050				1	1					1		3
leucine rich repeat containing 6 (testis)	Lrrc6	NM_019457	1					1					1	3
AMY-1-associating protein expressed in testis 1	Aat1	XM_489540	1				1					1		3
RIKEN cDNA E130303B06 gene	E130303B06Rik	NM_198299	1		1									2
forkhead box J1	Foxj1	NM_008240		1							1			2
AN1, ubiquitin-like, homolog (Xenopus laevis)	Anubl1	XM_132758					1						1	2
RuvB-like protein 1	Ruvbl1	NM_019685			1								1	2
centrosomal protein 76	Cep76	XM_129027	1							1				2
testis specific gene A14	Tsga14	NM_031998								1			1	2
spermatogenesis associated glutamate (E)-rich protein 4d	Speer4d	NM_025759								1			1	2
phosphatidylinositol-4-phosphate 5-kinase, type 1 beta	Pip5k1b	NM_008846							1				1	2
EF hand calcium binding domain 1	Efcab1	NM_025769						1					1	2
dimethylarginine dimethylaminohydrolase 1	Ddah1	NM_026993	1										1	2
centrosomal protein 97	Cep97	NM_028815								1			1	2
centrosomal protein 78	Cep78	NM_198019								1			1	2
armadillo repeat containing 3	Armc3	XM_130012				1							1	2
potassium channel regulator	Kcnrg	NM_206974						1					1	2
oxysterol binding protein-like 6	Osbpl6	NM_145525						1					1	2
calcium channel, voltage-dependent, T type, alpha 1H subunit	Cacna1h	NM_021415	1										1	2
myeloid leukemia factor 1	Mlf1	NM_010801				1							1	2
malate dehydrogenase 1B, NAD (soluble)	Mdh1b	NM_029696					1						1	2
transformed mouse 3T3 cell double minute 1	Mdm1	NM_148922								1			1	2
coiled-coil-helix-coiled-coil-helix domain containing 6	Chchd6	NM_025351											1	1
spermatid perinuclear RNA binding protein	Strbp	NM_176932											1	1
coiled-coil domain containing 15	Ccdc15	XM_146705								1				1
ataxia telangiectasia and rad3 related	Atr	XM_147046											1	1
cell adhesion molecule 1	Cadm1	NM_018770											1	1
integrin, alpha 10	Itga10	XM_112192											1	1
saccharopine dehydrogenase (putative)	Sccpdh	NM_178653											1	1
EF hand domain containing 1	Efhd1	NM_028889											1	1
Rho GTPase activating protein 11A	Arhgap11a	NM_181416											1	1
DENN/MADD domain containing 5B	Dennd5b	NM_177192											1	1
DIX domain containing 1	Dixdc1	NM_178118											1	1
sorbin and SH3 domain containing 1	Sorbs1	NM_009166											1	1
tectonic family member 3	Tctn3	NM_026260											1	1
sperm associated antigen 5	Spag5	NM_017407											1	1
acyl-Coenzyme A oxidase 2, branched chain	Acox2	NM_053115											1	1
histone cluster 2, H2aa1	Hist2h2aa1	NM_013549					1							1
DNA replication helicase 2 homolog (yeast)	Dna2	NM_177372											1	1
T-cell activation Rho GTPase-activating protein	Tagap	NM_145968											1	1
tetraspanin 2	Tspan2	NM_027533											1	1
Rho GDP dissociation inhibitor (GDI) gamma	Arhgdig	NM_008113											1	1
DNA segment, Chr 15, Wayne State University 169, expressed	D15Wsu169e	NM_198420											1	1
RIKEN cDNA 9230110C19 gene	9230110C19Rik	NM_199017	1											1
sperm autoantigenic protein 17	Spa17	NM_011449				1								1
dyslexia susceptibility 1 candidate 1 homolog (human)	Dyx1c1	NM_026314	1											1
RIKEN cDNA 2610021K21 gene	2610021K21Rik	XM_354690					1							1
leucine rich repeat containing 36	Lrrc36	XM_194421								1				1
coiled-coil domain containing 89	Ccdc89	XM_133591											1	1
aldehyde dehydrogenase 3 family, member B1	Aldh3b1	NM_026316											1	1
UBX domain protein 11	Ubxn11	NM_026257	1											1
RIKEN cDNA D630013G24 gene	D630013G24Rik	XM_357326											1	1
tetratricopeptide repeat domain 25	Ttc25	XM_126529				1								1
rhabdoid tumor deletion region gene 1	Rtdr1	XM_354544				1								1
kelch domain containing 9	Klhdc9	XM_287054	1											1
four and a half LIM domains 1	Fhl1	NM_010211											1	1
tetratricopeptide repeat domain 18	Ttc18	XM_127606										1		1
ropporin 1-like	Ropn1l	NM_145852				1								1
Anterior gradient homolog 3 (Xenopus laevis)	Agr3	NM_207531											1	1
family with sequence similarity 81, member A	Fam81a	XM_135000												0
polymerase (DNA directed), gamma 2, accessory subunit	Polg2	NM_015810												0
RIKEN cDNA 1700023L04 gene	1700023L04Rik	XM_485737												0
ubiquitin specific peptidase 11	Usp11	NM_145628												0
RIKEN cDNA 2610028H24 gene	2610028H24Rik	XM_483921												0
RIKEN cDNA 1110049B09 gene	1110049B09Rik	XM_126902												0
RIKEN cDNA 1700025K23 gene	1700025K23Rik	NM_183254												0
RNA binding motif protein 20	Rbm20	XM_140742												0
RIKEN cDNA 6030470M02 gene	6030470M02Rik	NM_177119												0
chibby homolog 1 (Drosophila)	Cby1	NM_028634												0
RIKEN cDNA E030019B06 gene	E030019B06Rik	XM_133957												0
F-box protein 36	Fbxo36	NM_025386												0
non-protein coding RNA 166	Ncrna00166	NM_025506												0
serine peptidase inhibitor, Kazal type 2	Spink2	NM_183284												0
RIKEN cDNA 1700003E16 gene	1700003E16Rik	XM_132615												0
radical S-adenosyl methionine domain containing 2	Rsad2	NM_021384												0
protein tyrosine phosphatase-like (proline instead of catalytic arginine), member a	Ptpla	NM_013935												0
RIKEN cDNA 1500015O10 gene	1500015O10Rik	NM_024283												0
MYCBP associated protein	Mycbpap	NM_170671												0
DAZ interacting protein 1-like	Dzip1l	NM_028258												0
N-acetylglutamate synthase	Nags	NM_178053												0
ectonucleotide pyrophosphatase/phosphodiesterase 4	Enpp4	NM_199016												0
RIKEN cDNA 3110040M04 gene	3110040M04Rik	XM_484925												0
interferon regulatory factor 8	Irf8	NM_008320												0
cytohesin 1 interacting protein	Cytip	NM_139200												0
RIKEN cDNA 1700040L02 gene	1700040L02Rik	NM_028491												0
paraneoplastic antigen MA1	Pnma1	XM_127024												0
immunoglobulin superfamily, member 11	Igsf11	NM_170599												0
RIKEN cDNA B230373P09 gene	B230373P09Rik	NM_177336												0
acyl-CoA thioesterase 1	Acot1	NM_012006												0
spire homolog 1 (Drosophila)	Spire1	NM_176832												0
growth factor receptor bound protein 14	Grb14	NM_016719												0
tubulin tyrosine ligase-like family, member 6	Ttll6	NM_172799												0
family with sequence similarity 118, member A	Fam118a	NM_133750												0
DNA segment, human D4S114	D0H4S114	NM_053078												0
RIKEN cDNA 0610010F05	0610010F05Rik	NM_027860												0
coiled-coil domain containing 14	Ccdc14	NM_172824												0
acylphosphatase 1, erythrocyte (common) type	Acyp1	NM_025421												0
Ras-related GTP binding D	Rragd	NM_027491												0
transcription elongation factor A (SII), 3	Tcea3	NM_011542												0
RIKEN cDNA 4930579J09 gene	4930579J09Rik	NM_133689												0
solute carrier family 27 (fatty acid transporter), member 2	Slc27a2	NM_011978												0
ninein	Nin	NM_008697												0
dysbindin (dystrobrevin binding protein 1) domain containing 1	Dbndd1	NM_028146												0
dynein, axonemal, intermediate chain 1	Dnaic1	NM_175138												0
RIKEN cDNA C530043A13 gene	C530043A13Rik	NM_176897												0
inturned planar cell polarity effector homolog (Drosophila)	Intu	NM_175515												0
MORN repeat containing 5	Morn5	XM_130188												0
zinc finger protein 423	Zfp423	NM_033327												0
chemokine (C-X-C motif) receptor 4	Cxcr4	NM_009911												0
potassium large conductance calcium-activated channel, subfamily M, beta member 2	Kcnmb2	NM_028231												0
chemokine-like factor	Cklf	NM_029295												0
spermatogenesis associated glutamate (E)-rich protein 4e	Speer4e	XM_486542												0
centrosomal protein 120	Cep120	NM_178686												0
cytoskeleton associated protein 2-like	Ckap2l	NM_181589												0
WAP four-disulfide core domain 3	Wfdc3	XM_355365												0
RIKEN cDNA 1700086L19 gene	1700086L19Rik	XM_358420												0
RIKEN cDNA 9530077C05 gene	9530077C05Rik	NM_026739												0
centrosome and spindle pole associated protein 1	Cspp1	XM_129366												0
RIKEN cDNA 6330503K22 gene	6330503K22Rik	NM_182995												0
serine/threonine/tyrosine interacting-like 1	Styxl1	NM_029659												0
RUN domain containing 3B	Rundc3b	NM_198620												0
RIKEN cDNA 6820408C15 gene	6820408C15Rik	NM_177656												0
RIKEN cDNA 6430537H07 gene	6430537H07Rik	NM_178689												0
RIKEN cDNA 4930452B06 gene	4930452B06Rik	NM_028934												0
proteasome (prosome, macropain) 26S subunit, ATPase 3, interacting protein	Psmc3ip	NM_008949												0
spermatogenesis associated 17	Spata17	NM_028848												0
RIKEN cDNA 1700054A03 gene	1700054A03Rik	XM_148917												0
tektin 2	Tekt2	NM_011902												0
RIKEN cDNA 1700001C02 gene	1700001C02Rik	NM_029285												0
family with sequence similarity 161, member B	Fam161b	NM_172581												0
RIKEN cDNA 2010300C02 gene	2010300C02Rik	XM_129808												0
microrchidia 1	Morc1	NM_010816												0
RIKEN cDNA 1700010I14 gene	1700010I14Rik	NM_025851												0
RIKEN cDNA 1700088E04 gene	1700088E04Rik	NM_138581												0
RIKEN cDNA A430083B19 gene	A430083B19Rik	NM_177624												0
heat shock protein family B (small), member 11	Hspb11	XM_204090												0
RIKEN cDNA 4932411E22 gene	4932411E22Rik	NM_172534												0
zinc finger protein 98	Zfp98	NM_016793												0
RIKEN cDNA 1700024G13 gene	1700024G13Rik	XM_147820												0
t-complex protein 11	Tcp11	NM_013687												0
family with sequence similarity 167, member A	Fam167a	NM_177628												0
phospholipase C, eta 1	Plch1	NM_183191												0
RIKEN cDNA 1110034A24 gene	1110034A24Rik	NM_027269												0
RIKEN cDNA 1200014M14 gene	1200014M14Rik	NM_026173												0
family with sequence similarity 154, member B	Fam154b	NM_177894												0
RIKEN cDNA 5133400G04 gene	5133400G04Rik	NM_027733												0
DnaJ (Hsp40) related, subfamily B, member 13	Dnajb13	NM_153527												0
F-box protein 16	Fbxo16	NM_015795												0
tetratricopeptide repeat domain 30B	Ttc30b	XM_485010												0
proline rich region 18	Prr18	NM_178774												0
von Willebrand factor A domain containing 3A	Vwa3a	NM_177697												0
male germ cell-associated kinase	Mak	NM_008547												0
t-complex-associated testis expressed 3	Tcte3	NM_011560												0
RIKEN cDNA 4933404M02 gene	4933404M02Rik	NM_025744												0
RIKEN cDNA 1700029J07 gene	1700029J07Rik	XM_134156												0
ubiquitin specific peptidase 2	Usp2	NM_016808												0
RIKEN cDNA 3230401M21 gene	3230401M21Rik	XM_128557												0
coiled-coil domain containing 151	Ccdc151	XM_134745												0
F-box protein 43	Fbxo43	NM_175281												0
RAB36, member RAS oncogene family	Rab36	XM_125709												0
testis-specific protein, Y-encoded-like 5	Tspyl5	XM_139378												0
outer dense fiber of sperm tails 3B	Odf3b	XM_128172												0
WD repeat domain 51A	Wdr51a	XM_135092												0
transmembrane protein 107	Tmem107	NM_028336												0
E2F transcription factor 7	E2f7	NM_178609												0
cyclin O	Ccno	XM_127523												0
HEAT repeat containing 5A	Heatr5a	NM_177171												0
RIKEN cDNA 1700026D08 gene	1700026D08Rik	NM_029335												0
zinc finger protein 474	Zfp474	NM_025749												0
major facilitator superfamily domain containing 6-like	Mfsd6l	NM_146004												0
ribokinase	Rbks	NM_153196												0
fragile histidine triad gene	Fhit	NM_010210												0
zinc finger, MYND domain containing 10	Zmynd10	NM_053253												0
pre-B lymphocyte gene 3	Vpreb3	NM_009514												0
RIKEN cDNA 3100002J23 gene	3100002J23Rik	XM_484029												0
cancer susceptibility candidate 1	Casc1	NM_177222												0
RIKEN cDNA 9130230L23 gene	9130230L23Rik	NM_177679												0
breast carcinoma amplified sequence 1	Bcas1	NM_029815												0
lucocorticoid induced transcript 1	Glcci1	NM_133236												0
UBX domain protein 10	Ubxn10	NM_178671												0
lipoma HMGIC fusion partner-like 2	Lhfpl2	NM_172589												0
radial spoke head 1 homolog (Chlamydomonas)	Rsph1	NM_025290												0
sialophorin	Spn	NM_009259												0
transmembrane 4 superfamily member 1	Tm4sf1	NM_008536												0
kinase non-catalytic C-lobe domain (KIND) containing 1	Kndc1	XM_133920												0
Scl/Tal1 interrupting locus	Stil	NM_009185												0
RIKEN cDNA E030011K20 gene	E030011K20Rik	XM_149293												0
coiled-coil domain containing 81	Ccdc81	XM_133659												0
myeloblastosis oncogene	Myb	NM_010848												0
leucine-rich repeats and guanylate kinase domain containing	Lrguk	XM_133060												0
RIKEN cDNA 1700001L19 gene	1700001L19Rik	XM_127414												0
radial spokehead-like 3	Rshl3	XM_137041												0
creatine kinase, brain	Ckb	NM_021273												0
translin-associated factor X (Tsnax) interacting protein 1	Tsnaxip1	NM_024445												0
cyclin A1	Ccna1	NM_007628												0
tetratricopeptide repeat domain 16	Ttc16	NM_177384												0
DPY30 domain containing 2	Dydc2	XM_127662												0
calmodulin-like 4	Calml4	NM_138304												0
PIH1 domain containing 2	Pih1d2	NM_028300												0
RIKEN cDNA 4833427G06 gene	4833427G06Rik	NM_177702												0
WD repeat domain 65	Wdr65	NM_026789												0
neuralized homolog 1A (Drosophila)	Neurl1a	NM_021360												0
cytidine monophosphate (UMP-CMP) kinase 2, mitochondrial	Cmpk2	NM_020557												0
storkhead box 1	Stox1	XM_125685												0
D-aspartate oxidase	Ddo	NM_027442												0
RIKEN cDNA A330021E22 gene	A330021E22Rik	NM_172447												0
RIKEN cDNA 4930504H06 gene	4930504H06Rik	XM_126856												0
RIKEN cDNA 1700028P14 gene	1700028P14Rik	NM_026188												0
leucine rich repeat containing 67	Lrrc67	NM_145692												0
RIKEN cDNA 1700013F07 gene	1700013F07Rik	XM_131080												0
dynein, axonemal, heavy chain 2	Dnahc2	NM_177617												0
Upregulated (M>=2) in FoxJ1:GFP+ MTECs at ALI+12			Found/Not Found in study ( ’1’ indicates that the gene was identified in the indicated study)
Gene Name	Gene Symbol	Accession	Li	Efimenko	Stolc	Ostrowski	Pazour	Avidor-Reiss	Keller	Andersen	Blacque	Broadhead	Liu	Total
intraflagellar transport 81 homolog (Chlamydomonas)	Ift81	NM_009879	1	1	1		1	1		1	1	1	1	9
centrosomal protein 135	Cep135	NM_199032	1	1			1	1	1	1	1	1	1	9
coiled-coil domain containing 41	Ccdc41	NM_029852		1		1	1	1		1	1	1	1	8
polo-like kinase 4 (Drosophila)	Plk4	NM_011495	1	1		1	1	1	1	1		1		8
coiled-coil domain containing 18	Ccdc18	XM_144475		1		1	1	1		1	1	1	1	8
Microtubule associated serine/threonine kinase 3	Mast3	NM_199308		1	1		1	1	1	1	1		1	8
coiled-coil domain containing 39	Ccdc39	NM_026222		1		1	1			1	1	1	1	7
kinesin family member 27	Kif27	NM_175214			1	1	1	1		1		1	1	7
RIB43A domain with coiled-coils 1	Ribc1	NM_025660	1		1	1	1	1	1			1		7
EF-hand domain (C-terminal) containing 1	Efhc1	XM_129694	1		1	1	1	1	1			1		7
protein kinase C, beta	Prkcb	NM_008855		1			1	1	1	1	1		1	7
dual-specificity tyrosine-(Y)-phosphorylation regulated kinase 3	Dyrk3	NM_145508		1	1		1		1	1	1		1	7
cyclin-dependent kinase-like 2 (CDC2-related kinase)	Cdkl2	NM_016912		1	1		1		1	1	1		1	7
meiosis-specific nuclear structural protein 1	Mns1	NM_008613	1		1	1	1			1			1	6
leucine rich repeat containing 48	Lrrc48	NM_029044	1		1		1	1				1	1	6
dynein, axonemal, light intermediate polypeptide 1	Dnali1	NM_175223	1		1	1	1	1				1		6
sperm associated antigen 6	Spag6	NM_015773	1		1	1	1					1	1	6
WD repeat domain 63	Wdr63	NM_172864	1		1	1	1	1				1		6
WD repeat domain 78	Wdr78	NM_146254	1		1	1	1		1					5
tektin 4	Tekt4	XM_128462	1		1	1	1		1					5
tubulin polymerization-promoting protein family member 3	Tppp3	NM_026481	1	1				1			1		1	5
leucine rich repeat containing 23	Lrrc23	NM_013588	1		1	1	1						1	5
myosin, light polypeptide 4	Myl4	NM_010858		1			1				1	1	1	5
leucine rich repeat containing 50	Lrrc50	NM_026648	1		1		1	1					1	5
Bardet-Biedl syndrome 5 (human)	Bbs5	NM_028284	1	1				1			1		1	5
tektin 1	Tekt1	NM_011569	1		1	1	1		1					5
RIKEN cDNA 1700026L06 gene	1700026L06Rik	XM_130129				1				1		1	1	4
Leucine rich repeat containing 34	Lrrc34	XM_487721					1			1		1	1	4
RIKEN cDNA 4930451C15 gene	4930451C15Rik	XM_148428					1			1		1	1	4
coiled-coil domain containing 65	Ccdc65	NM_153518	1		1		1	1						4
coiled-coil domain containing 114	Ccdc114	XM_133435	1			1	1	1						4
cadherin 11	Cdh11	NM_009866		1							1		1	3
RIKEN cDNA 4932425I24 gene	4932425I24Rik	XM_489540	1				1					1		3
leucine rich repeat containing 6 (testis)	Lrrc6	NM_019457	1					1					1	3
RIKEN cDNA 1190002A17 gene	1190002A17Rik	XM_130050				1	1					1		3
echinoderm microtubule associated protein like 1, transcript variant 1	Eml1	XM_127139	1				1						1	3
RIKEN cDNA 1700008D07 gene	1700008D07Rik	XM_485969	1		1		1							3
coiled-coil domain containing 113	Ccdc113	NM_172914	1		1		1							3
MORN repeat containing 3	Morn3	XM_132350					1					1	1	3
RIKEN cDNA 1700019L03 gene	1700019L03Rik	XM_484987	1				1			1				3
fibrinogen-like protein 2	Fgl2	NM_008013		1							1		1	3
transformed mouse 3T3 cell double minute 1	Mdm1	NM_148922								1			1	2
myeloid leukemia factor 1	Mlf1	NM_010801				1							1	2
calcium channel, voltage-dependent, T type, alpha 1H subunit	Cacna1h	NM_021415	1										1	2
malate dehydrogenase 1B, NAD (soluble)	Mdh1b	NM_029696					1						1	2
RuvB-like protein 1	Ruvbl1	NM_019685			1								1	2
dimethylarginine dimethylaminohydrolase 1	Ddah1	NM_026993	1										1	2
protein tyrosine phosphatase, receptor type, C	Ptprc	NM_011210						1					1	2
phosphatidylinositol-4-phosphate 5-kinase, type 1 beta	Pip5k1b	NM_008846							1				1	2
centrosomal protein 78	Cep78	NM_198019								1			1	2
oxysterol binding protein-like 6	Osbpl6	NM_145525						1					1	2
Anterior gradient homolog 3 (Xenopus laevis)	Agr3	NM_207531											1	1
four and a half LIM domains 1	Fhl1	NM_010211											1	1
UBX domain protein 11	Ubxn11	NM_026257	1											1
aldehyde dehydrogenase 3 family, member B1	Aldh3b1	NM_026316											1	1
ropporin 1-like	Ropn1l	NM_145852				1								1
RIKEN cDNA D630013G24 gene	D630013G24Rik	XM_357326											1	1
tetratricopeptide repeat domain 25	Ttc25	XM_126529				1								1
rhabdoid tumor deletion region gene 1	Rtdr1	XM_354544				1								1
Rho GDP dissociation inhibitor (GDI) gamma	Arhgdig	NM_008113											1	1
MORN repeat containing 5	Morn5	BC036965				1								1
DNA segment, Chr 15, Wayne State University 169, expressed	D15Wsu169e	NM_198420											1	1
Pyridoxal (pyridoxine, vitamin B6) kinase	Pdxk	XM_488563											1	1
GRAM domain containing 1B	Gramd1b	NM_172768											1	1
tetratricopeptide repeat domain 18	Ttc18	XM_127606										1		1
complement component 1, s subcomponent	C1s	NM_144938						1						1
microtubule-associated protein 1B	Mtap1b	NM_008634											1	1
saccharopine dehydrogenase (putative)	Sccpdh	NM_178653											1	1
leucine rich repeat containing 36	Lrrc36	XM_194421								1				1
CD53 antigen	Cd53	NM_007651											1	1
RIKEN cDNA A330021E22 gene	A330021E22Rik	NM_172447												0
radial spoke head 1 homolog (Chlamydomonas)	Rsph1	NM_025290												0
calmodulin-like 4	Calml4	NM_138304												0
pleckstrin	Plek	NM_019549												0
creatine kinase, brain	Ckb	NM_021273												0
translin-associated factor X (Tsnax) interacting protein 1	Tsnaxip1	NM_024445												0
leucine rich repeat containing 67	Lrrc67	NM_145692												0
neuralized homolog 1A (Drosophila)	Neurl1a	NM_021360												0
cyclin O	Ccno	XM_127523												0
transmembrane 4 superfamily member 1	Tm4sf1	NM_008536												0
RIKEN cDNA 1700026D08 gene	1700026D08Rik	NM_029335												0
pre-B lymphocyte gene 3	Vpreb3	NM_009514												0
RIKEN cDNA 2010300C02 gene	2010300C02Rik	XM_129808												0
RIKEN cDNA 1700028P14 gene	1700028P14Rik	NM_026188												0
Glucocorticoid induced transcript 1	Glcci1	NM_178072												0
RIKEN cDNA 4833427G06 gene	4833427G06Rik	NM_177702												0
myeloblastosis oncogene	Myb	NM_010848												0
RIKEN cDNA 4933434I06 gene	4933434I06Rik	XM_283704												0
DPY30 domain containing 2	Dydc2	XM_127662												0
CD36 antigen	Cd36	NM_007643												0
cytidine monophosphate (UMP-CMP) kinase 2, mitochondrial	Cmpk2	NM_020557												0
RIKEN cDNA 3100002J23 gene	3100002J23Rik	XM_484029												0
lipoma HMGIC fusion partner-like 2	Lhfpl2	NM_172589												0
RIKEN cDNA 4930504H06 gene	4930504H06Rik	XM_126856												0
ribokinase	Rbks	NM_153196												0
cytohesin 1 interacting protein	Cytip	NM_139200												0
WD repeat domain 65	Wdr65	NM_026789												0
RIKEN cDNA E030011K20 gene	E030011K20Rik	XM_149293												0
dynein, axonemal, heavy chain 2	Dnahc2	NM_177617												0
talin 1	Tln1	NM_011602												0
RIKEN cDNA 6820408C15 gene	6820408C15Rik	NM_177656												0
macrophage expressed gene 1	Mpeg1	XM_129176												0
kinase non-catalytic C-lobe domain (KIND) containing 1	Kndc1	XM_133920												0
UBX domain protein 10	Ubxn10	NM_178671												0
D-aspartate oxidase	Ddo	NM_027442												0
RIKEN cDNA 1700013F07 gene	1700013F07Rik	XM_131080												0
X-linked lymphocyte-regulated complex	Xlr	NM_011725												0
Ciliated bronchial epithelium 1	Cbe1	XM_355478												0
glycine amidinotransferase (L-arginine:glycine amidinotransferase)	Gatm	NM_025961												0
breast carcinoma amplified sequence 1	Bcas1	NM_029815												0
sialophorin	Spn	NM_009259												0
RIKEN cDNA 4933404M02 gene	4933404M02Rik	NM_025744												0
coiled-coil domain containing 81	Ccdc81	XM_133659												0
Scl/Tal1 interrupting locus	Stil	NM_009185												0
ectonucleotide pyrophosphatase/phosphodiesterase 4	Enpp4	NM_199016												0
sphingosine-1-phosphate receptor 1	S1pr1	NM_007901												0
storkhead box 1	Stox1	XM_125685												0
radial spokehead-like 3	Rshl3	XM_137041												0
chemokine (C-X-C motif) ligand 12	Cxcl12	NM_013655												0
Tctex1 domain containing 2	Tctex1d2	NM_025329												0
t-complex protein 11	Tcp11	NM_013687												0
deiodinase, iodothyronine, type I	Dio1	NM_007860												0
lipoma HMGIC fusion partner	Lhfp	NM_175386												0

## Sheet: FoxJ1 targets
Table S5. Overlap of the ciliated MTEC transcriptome with other proteomic, transcriptomic and genomic studies of the cilium and centrosome.
Putative targets of human FOXJ1 (as identified in Stubbs et al., 2008, Nat Genet 40: 1454-1460 and Yu et al., 2008, Nat Genet 40: 1445-1453) have mouse orthologs that were significantly upregulated (M>2) at ALI+4 and ALI+12 in FOXJ1:GFP+ MTECs.
Known human FOXJ1 target Gene Name	Known human FOXJ1 target Gene Symbol	mRNA accession number	Study identifying human FOXJ1 target	Mouse Ortholog of Human Gene	Upregulated (M>=2) in FOXJ1:GFP+ MTECs at ALI+4	Upregulated (M>=2) in FOXJ1:GFP+ MTECs at ALI+12	Present in Cilia Proteome (see www.ciliaproteome.org )
					’1’ indicates that the gene was identified in the indicated study
ADAM metallopeptidase domain 22	ADAM22	NM_004194	Stubbs et al., 2008	Adam22
ADENYLATE KINASE 5	AK5	NM_012093	Stubbs et al., 2008	Ak5
ADENYLATE KINASE 7	AK7	NM_152327	Stubbs et al., 2008	Ak7			1
ANKYRIN REPEAT DOMAIN 45	ANKRD45	NM_198493	Stubbs et al., 2008	Ankrd45	1
ARMADILLO REPEAT CONTAINING 4	ARMC4	NM_018076	Stubbs et al., 2008	Armc4
ARYL-HYDROCARBON RECEPTOR NUCLEAR TRANSLOCATOR 2	ARNT2	NM_014862	Stubbs et al., 2008	Arnt2
HYPOTHETICAL PROTEIN MGC40178	C13ORF26	NM_152325	Stubbs et al., 2008	4930588N13Rik	1
CHROMOSOME 14 OPEN READING FRAME 45	C14ORF45	NM_025057	Stubbs et al., 2008	Ccdc176
CHROMOSOME 14 OPEN READING FRAME 50	C14ORF50	NM_172365	Stubbs et al., 2008	Ppp1r36
CHROMOSOME 15 OPEN READING FRAME 26	C15ORF26	NM_173528	Stubbs et al., 2008	1700026D08Rik	1	1
GENE TRAP LOCUS 3 (MOUSE)	C16ORF80	NM_013242	Stubbs et al., 2008	Gtl3
	C20orf28		Stubbs et al., 2008	Spef1	1
CHROMOSOME 6 OPEN READING FRAME 206	C6ORF206	NM_152732	Stubbs et al., 2008	Rsph9
CHROMOSOME 6 OPEN READING FRAME 97	C6ORF97	NM_025059	Stubbs et al., 2008	Ccdc170
CHROMOSOME 8 OPEN READING FRAME 70	C8ORF70	NM_016010	Stubbs et al., 2008	Fam164A	1	1
CHROMOSOME 9 OPEN READING FRAME 116	C9ORF116	NM_144654	Stubbs et al., 2008	1700007K13Rik
CHROMOSOME 9 OPEN READING FRAME 68	C9ORF68	NM_001039395	Stubbs et al., 2008	4430402I18Rik	1
CHROMOSOME 9 OPEN READING FRAME 98	C9ORF98	NM_152572	Stubbs et al., 2008	Ak8	1	1
HYPOTHETICAL PROTEIN FLJ40365	CCDC105	NM_173482	Stubbs et al., 2008	Ccdc105
COILED-COIL DOMAIN CONTAINING 19	CCDC19	NM_012337	Stubbs et al., 2008	Ccdc19	1	1
COILED-COIL DOMAIN CONTAINING 27	CCDC27	NM_152492	Stubbs et al., 2008	Ccdc27
COILED-COIL DOMAIN CONTAINING 63	CCDC63	NM_152591	Stubbs et al., 2008	Ccdc63
COILED-COIL DOMAIN CONTAINING 78	CCDC78	NM_173476	Stubbs et al., 2008	Ccdc78
HYPOTHETICAL PROTEIN FLJ10786	CCDC87	NM_018219	Stubbs et al., 2008	Ccdc87	1
HYPOTHETICAL PROTEIN FLJ90575	CCDC96	NM_153376	Stubbs et al., 2008	Ccdc96		1
CENTRIN 2	CETN2	NM_019405	Yu et al, 2008	Cetn2	1	1	1
CYTOCHROME P450, FAMILY 1, SUBFAMILY A, POLYPEPTIDE 1	CYP1A1	NM_000499	Stubbs et al., 2008	Cyp1l1
DOUBLECORTIN DOMAIN CONTAINING 2	DCDC2	NM_016356	Stubbs et al., 2008	Dcdc2a
SIMILAR TO DOUBLECORTIN DOMAIN-CONTAINING PROTEIN 2 (RU2S PROTEIN)	DCDC2B	XM_940631	Stubbs et al., 2008	Dcdc2b
DYNEIN, AXONEMAL, HEAVY POLYPEPTIDE 8	DNAH8	NM_001371	Stubbs et al., 2008	Dnah8
DYNEIN, AXONEMAL, HEAVY POLYPEPTIDE 9	DNAH9	NM_004662	Stubbs et al., 2008; Yu et al, 2008	Dnahc9	1	1	1
DYNEIN, AXONEMAL, INTERMEDIATE POLYPEPTIDE 1	DNAI1	NM_012144	Stubbs et al., 2008	Dnaic1	1	1
DYNEIN, AXONEMAL, LIGHT INTERMEDIATE POLYPEPTIDE 1	DNALI1	NM_003462	Stubbs et al., 2008	Dnali1	1	1
DPY30 DOMAIN CONTAINING 1	DYDC1	NM_138812	Stubbs et al., 2008	Dydc1	1	1
DYNEIN, LIGHT CHAIN, ROADBLOCK-TYPE 2	DYNLRB2	NM_130897	Stubbs et al., 2008	Dynlrb2	1	1
HYPOTHETICAL PROTEIN FLJ10466	EFHC1	NM_018100	Stubbs et al., 2008, Yu et al, 2008	Efhc1	1	1
FAMILY WITH SEQUENCE SIMILARITY 92, MEMBER B	FAM92B	NM_198491	Stubbs et al., 2008	Fam92b
F-BOX PROTEIN 31	FBXO31	NM_024735	Stubbs et al., 2008	Fbxo31
FILAMIN C, GAMMA (ACTIN BINDING PROTEIN 280)	FLNC	NM_001458	Stubbs et al., 2008	Flnc
GUANOSINE MONOPHOSPHATE REDUCTASE 2	GMPR2	NM_001002002	Stubbs et al., 2008	Gmpr2
G PROTEIN-COUPLED RECEPTOR 156	GPR156	NM_153002	Stubbs et al., 2008	Gpr156
HOMEOBOX A1	HOXA1	NM_153620	Stubbs et al., 2008	Hoxa1
HOMEOBOX A3	HOXA3	NM_153632	Stubbs et al., 2008	Hoxa3
IQ MOTIF CONTAINING WITH AAA DOMAIN	IQCA	NM_024726	Stubbs et al., 2008	Iqca			1
IQ MOTIF CONTAINING H	IQCH	NM_001031715	Stubbs et al., 2008	Spata17	1
JANUS KINASE 2 (A PROTEIN TYROSINE KINASE)	JAK2	NM_004972	Stubbs et al., 2008	Jak2	1
KIAA1370	KIAA1370	NM_019600	Stubbs et al., 2008	BC031353	1	1
KINESIN FAMILY MEMBER 9	KIF9	NM_182903	Stubbs et al., 2008	Kif9	1	1
LUTEINIZING HORMONE BETA POLYPEPTIDE	LHB	NM_000894	Stubbs et al., 2008	Lhb	1
HYPOTHETICAL LOC342346	LOC342346	XM_296817	Stubbs et al., 2008	4930562C15Rik
	LOC463933		Stubbs et al., 2008	4930415F15Rik
LEUCINE RICH REPEAT CONTAINING 27	LRRC27	NM_030626	Stubbs et al., 2008	Lrrc27
LEUCINE RICH REPEAT CONTAINING 34	LRRC34	NM_153353	Stubbs et al., 2008	Lrrc34
	LRRC50		Stubbs et al., 2008	Dnaaf1	1	1
LEUCINE RICH REPEAT CONTAINING 51	LRRC51	NM_145309	Stubbs et al., 2008	Lrrc51
NIMA (NEVER IN MITOSIS GENE A)-RELATED KINASE 5	NEK5	NM_199289	Stubbs et al., 2008	Nek5	1	1
NON-METASTATIC CELLS 5, PROTEIN EXPRESSED IN (NUCLEOSIDE-DIPHOSPHATE KINASE)	NME5	NM_003551	Stubbs et al., 2008	Nme5	1	1
OUTER DENSE FIBER OF SPERM TAILS 3	ODF3	NM_053280	Stubbs et al., 2008	Odf3	1	1
PHOSPHODIESTERASE 4D, CAMP-SPECIFIC (PHOSPHODIESTERASE E3 DUNCE HOMOLOG, DROSOPHILA)	PDE4D	NM_006203	Stubbs et al., 2008	Pde4d
RENAL TUMOR ANTIGEN	RAGE	NM_014226	Stubbs et al., 2008	Stk30	1	1
ROPPORIN 1-LIKE	ROPN1L	NM_031916	Stubbs et al., 2008	Ropn1l	1	1
	RSHL2		Stubbs et al., 2008	Rsph3a	1	1
RADIAL SPOKEHEAD-LIKE 3	RSHL3	NM_001010892	Stubbs et al., 2008	Rsph4a	1	1
RHABDOID TUMOR DELETION REGION GENE 1	RTDR1	NM_014433	Stubbs et al., 2008	Rtdr1
RETICULON 1	RTN1	NM_021136	Stubbs et al., 2008	Rtn1
SPERM AUTOANTIGENIC PROTEIN 17	SPA17	NM_017425	Stubbs et al., 2008	Spa17	1	1
SPERM ASSOCIATED ANTIGEN 6	SPAG6	NM_172242	Stubbs et al., 2008	Spag6	1	1
SPERM ASSOCIATED ANTIGEN 8	SPAG8	NM_172312	Stubbs et al., 2008	Spag8
SPECTRIN REPEAT CONTAINING, NUCLEAR ENVELOPE 1	SYNE1	NM_182961	Stubbs et al., 2008	Syne1	1
TCTEX1 DOMAIN CONTAINING 1	TCTEX1D1	NM_152665	Stubbs et al., 2008	Tctex1d1
TEKTIN 1	TEKT1	NM_053285	Stubbs et al., 2008, Yu et al, 2008	Tekt1	1	1
TEKTIN 2 (TESTICULAR)	TEKT2	NM_014466	Stubbs et al., 2008	Tekt2	1	1	1
TEKTIN 3	TEKT3	NM_031898	Stubbs et al., 2008	Tekt3	1		1
TEKTIN 4	TEKT4	NM_144705	Stubbs et al., 2008	Tekt4	1	1
TESTIS/PROSTATE/PLACENTA-EXPRESSED PROTEIN, ISOFORM 2	TEPP	NM_199456	Stubbs et al., 2008	Tepp
TRANSMEMBRANE 4 L SIX FAMILY MEMBER 1	TM4SF1	NM_014220	Stubbs et al., 2008	Tm4sf1	1	1
TRANSMEMBRANE 4 L SIX FAMILY MEMBER 18	TM4SF18	NM_138786	Stubbs et al., 2008
	TSGA2		Stubbs et al., 2008	Rsph1
TETRATRICOPEPTIDE REPEAT DOMAIN 12	TTC12	NM_017868	Stubbs et al., 2008	Ttc12			1
WD REPEAT DOMAIN 16	WDR16	NM_001037306	Stubbs et al., 2008	Wdr16	1	1
NA	WDR38	NA	Stubbs et al., 2008	Wdr38
WD REPEAT DOMAIN 49	WDR49	NM_178824	Stubbs et al., 2008	Wdr49
WD REPEAT DOMAIN 63	WDR63	NM_145172	Stubbs et al., 2008	Wdr63	1	1
WD REPEAT DOMAIN 66	WDR66	NM_144668	Stubbs et al., 2008	Wdr66	1
WD REPEAT DOMAIN 69	WDR69	NM_178821	Stubbs et al., 2008	Wdr69	1
WD REPEAT DOMAIN 78	WDR78	NM_146254	Yu et al, 2008	Wdr78	1	1	1
				Total genes	42	31	8

## Sheet: In silico analysis
Table S5. Overlap of the ciliated MTEC transcriptome with other proteomic, transcriptomic and genomic studies of the cilium and centrosome.
Mouse genes with predicted links to cilia (see McClintock et al., 2008, Physiolog. Gen., 32:198-206), as identified by in silico analysis of ciliated tissues, are significantly upregulated (M>2) at ALI+4 and ALI+12 in FOXJ1:GFP+ MTECs.
	’1’ indicates that the gene was identified in the indicated study
Mouse genes predicted to be linked to cilia	Upregulated (M>=2) in FOXJ1:GFP+ MTECs at ALI+4	Upregulated (M>=2) in FOXJ1:GFP+ MTECs at ALI+12
0610012D17Rik
1110017D15Rik
1110020C03Rik
1700001L19Rik	1
1700003E16Rik
1700003M02Rik
1700009P17Rik
1700012B09Rik
1700019L03Rik
1700024G13Rik	1
1700026D08Rik	1	1
1700026J04Rik
1700027A23Rik
1700028P14Rik	1	1
1700040L02Rik	1
1700061J05Rik
2310007A19Rik
4733401H18Rik	1
4833427G06Rik	1	1
4921537D05Rik
4922501L14Rik
4930418G15Rik
4930428O21Rik
4930455F23Rik
4930504H06Rik	1	1
4930528G09Rik
4930562D19Rik	1
4931407G18Rik
4931415C17Rik
4933434I06Rik	1	1
6820408C15Rik	1	1
9530077C05Rik	1
A330021E22Rik	1	1
Abhd14a
Ankrd54	1
Armc3	1
Armc4
Atp8b3
AW456874
BC022687
C330001K17Rik
C330043M08Rik
C730024G19Rik
Ccdc108
Ccdc113	1
Ccdc39	1	1
Ccdc65	1
Cetn4	1
Cyb5d1
D630004A14Rik
Dnajb14
Dnali1	1	1
Dydc2	1	1
E130303B06Rik	1
Efhc1	1	1
Epyc (Dspg3)
Foxj1	1
Gm1060
Gm276
Gm70
Gm770
Gm777
gnf1m07624_a_at
gnf1m11188_a_at
Hspa4l
Hydin	1
Ift172
Ift74 (Ccdc2)
Insl6
Kif27	1	1
LOC329164
Lrch3
Lrrc23 (Lrpb7)
Lrrc34
Lrrc6	1	1
Mdh1b	1	1
Meig1
Nme5
Nphp1	1
Pacrg	1
Ppil6
Rfx2	1
Rshl2
Spa17	1
Spag6	1
Tekt1
Tmem53
Tsga2
Tsnaxip1	1	1
Ttc18	1
Ttc21a
Ttc25	1	1
Ttc30a1
Ttll6	1
Wdr16
Wdr66
Zfp474	1
Zfp688
Zmynd10	1
Total genes	39	16
