# Supplementary material for: Transcriptional Program of Ciliated Epithelial Cells Reveals New Cilium and Centrosome Components and Links to Human Disease
Source: PLoS One. 2012 Dec 31;7(12):e52166. doi: 10.1371/journal.pone.0052166 (PMC3534086; doi:10.1371/journal.pone.0052166)
Supplement: Table S6 — Mining the Human Protein Atlas for localization of human orthologs of candidate ciliated MTEC proteins in multiciliated human tissues. (XLSX) [file pone.0052166.s006.xlsx]

## Sheet: Sheet1
Table S6. Mining the Human Protein Atlas for localization of human orthologs of candidate ciliated MTEC proteins in multiciliated human tissues.
The human orthologs of genes that were significantly upregulated in FOXJ1:GFP+ MTECs were found by reciprocal BLAST. Images of the bronchus, nasopharynx and fallopian tube from the Human Protein Atlas database (HPA) were then searched to determine whether the ortohlogous human proteins localize to ciliated tissues.
Human gene symbol	Bronchus	Nasopharynx	Fallopian Tube
AASS	cilia		cilia
ABCC12		basal body
ABCG1	cilia	cilia	cilia
ABHD8			basal body
ACOT11			basal body
ACOX2			basal body
ACPL2		whole cell
ACYP1	whole cell
ADAMTS2	whole cell	whole cell	basal body
ADAMTS5	cilia		cilia
ADCK4	whole cell	whole cell
ADCY6	whole cell	cilia	cilia
AK1	whole cell		whole cell
AKAP9		basal body	basal body
AKR1B10	whole cell
AKR1C3		nucleus
AKT3			basal body
ALLC	basal body		basal body
ALOX15	whole cell	whole cell
ALS2CR12			basal body
ANKRD32	basal body		basal body
ANKRD42	cilia	cilia	cilia
ANKRD5		cilia	cilia
ANUBL1			basal body
AP3M2	whole cell
AQP1	whole cell	basal body	cilia
ARHGAP33	whole cell
ARHGAP39		basal body	basal body
ARHGEF38			cilia
ARL3	basal body		cilia
ARL6	cilia	cilia	cilia
ARMC3	cilia	cilia	cilia
AS3MT			basal body
ASB5	cilia		cilia
ASB7			basal body
ASPN	nucleus
AZI1	basal body		basal body
BAIAP2	basal body	cilia, basal body
BBS7	basal body	basal body	basal body
BBS9	whole cell		basal body
BCAS1	cilia
BMX	cilia		cilia
BPHL	whole cell
C10ORF107	cilia		cilia
C11ORF52	basal body
C11ORF63	cilia	basal body	cilia
C11ORF66	cilia		cilia
C11ORF70			cilia
C12ORF35		nucleus
C13ORF30	basal body		basal body
C14ORF104			whole cell
C14ORF105	basal body	cilia	cilia
C14ORF145			basal body
C16ORF46			basal body
C16ORF48		basal body	basal body
C16ORF70		basal body	basal body
C17ORF53			basal body
C17ORF97			whole cell
C1ORF114	cilia	cilia	cilia
C1ORF194		cilia	cilia
C1R			cilia
C21ORF58			basal body
C21ORF59	whole cell		whole cell
C22ORF23	basal body		basal body
C6ORF118			basal body
C8ORF37	basal body
C9ORF117	cilia		cilia
C9ORF40	cilia
C9ORF68	basal body	basal body	basal body
C9ORF9	cilia	cilia	cilia
C9ORF98	cilia	cilia	cilia
CACNA1H	basal body
CALM1	whole cell	whole cell	cilia
CAMK1D	whole cell
CASC1		cilia
CASP7	whole cell		basal body
CCDC104	cilia	cilia	cilia
CCDC11	cilia	cilia	cilia
CCDC114			cilia
CCDC18	whole cell		basal body
CCDC33	cilia, basal body		basal body
CCDC39	cilia	cilia	cilia
CCDC40	cilia
CCDC41	basal body	basal body	basal body
CCDC45	nucleus
CCDC57	whole cell		basal body
CCDC77			basal body
CCDC92			cilia
CD97			basal body
CDC23	cilia, whole cell	cilia	cilia
CDC42SE2			basal body
CDH26	cilia	cilia
CDK20	whole cell
CDKL1	cilia
CDS1	whole cell	whole cell	whole cell
CEP120		basal body	basal body
CEP152	basal body	basal body	basal body
CEP350	basal body	basal body	basal body
CEP76	whole cell
CEP97	basal body, whole cell	whole cell	basal body
CETN2	whole cell	whole cell	cilia, whole cell
CHKA		whole cell	basal body
CHKB	whole cell	basal body	basal body
CISH		cilia, basal body
CKS2	nucleus
CLMP			cilia
CNTROB			basal body
COASY			cilia
CPT1B			basal body
CREM			basal body
CRIP1			whole cell
CRIP2	basal body		cilia
CRY2		whole cell
CTSS			whole cell
CTXN1	whole cell	whole cell	basal body
CYTIP			basal body
DCLK2	whole cell
DDO		whole cell
DDX19B		basal body	basal body
DDX20	basal body		basal body
DFNA5	whole cell		basal body
DHX58	whole cell		basal body
DLK1	cilia	cilia	cilia
DNA2	whole cell
DNAH5	cilia	cilia
DNAH8	whole cell	basal body
DNAI1	cilia	cilia
DNAJC15	cilia	whole cell	cilia
DNALI1	cilia		cilia
DPCD	whole cell
DUSP14			basal body
DYDC1	cilia		basal body
DYDC2	cilia	cilia	cilia, whole cell
DYX1C1	cilia	cilia	basal body
DZIP1L	cilia, basal body	cilia	cilia
EFCAB1	cilia		cilia, whole cell
EFCAB10	cilia	cilia	cilia
EFCAB2			cilia
EFCAB6	cilia		cilia
EFCAB7	cilia	cilia
EFHC1			basal body
EFHC2		cilia	cilia
EML2	whole cell
ENAH		cilia	basal body
ENKUR	cilia	cilia	cilia
ENPP4	whole cell
ENTPD1		whole cell	cilia
ENTPD5			cilia
ESM1	cilia		whole cell
ETAA1		whole cell	basal body
EXOC2	basal body		basal body
FAM102B			basal body
FAM13A			cilia
FAM13C			basal body
FAM154B	cilia	cilia	cilia
FAM161A	cilia	cilia	cilia
FAM161B	basal body	basal body	basal body
FAM167A			basal body
FAM179A			basal body
FAM54A			cilia
FAM54B	whole cell	cilia	cilia
FANK1			basal body
FARSA	whole cell
FEZ1			basal body
FGL2	basal body
FHIT	whole cell
FHL1			basal body
FKBP5	nucleus
FLOT1			cilia
FOXA2	nucleus		nucleus
FOXJ1	nucleus	nucleus	nucleus
FSD1L		whole cell	cilia, whole cell
FSIP1	basal body		basal body
G3BP2	whole cell
GATA2		nucleus
GCH1		basal body
GLCCI1			basal body
GLI2	nucleus
GMPR	whole cell
GNB5			basal body
GOSR2		basal body
GPR176		cilia
GPR183	whole cell		basal body
GRPEL2			basal body
H2AFX		nucleus
HAP1			cilia
HBS1L	whole cell	whole cell	basal body
HIC2	whole cell
HOXC8	whole cell
HSF2			basal body
HSP90AA1			whole cell
HSPB11	cilia	cilia, basal body	basal body
HSPH1	whole cell		whole cell
IFT57	basal body, whole cell	cilia, whole cell	cilia
IFT74	basal body		basal body
IFT81	cilia, basal body, whole cell		basal body
IGF2			cilia
IKBKG			basal body
IL1RL1			cilia
IL3RA	whole cell	whole cell	cilia, basal body
INTU	whole cell
IQCC			basal body
IQCE	basal body		cilia
IQCG			basal body
ITPKA	whole cell
JAM3	cilia		cilia
KBTBD4	nucleus
KCNAB2			basal body
KCNRG			cilia
KIAA0753	whole cell
KIF27	basal body		basal body
KIF2C	whole cell
KIF3A	basal body, whole cell		cilia
KIF5C	basal body, whole cell		cilia
KIF9	cilia	cilia	cilia
KLHL5	whole cell
LCORL		basal body	basal body
LDHB			basal body
LDOC1L			basal body
LINGO1			cilia
LMLN			basal body
LONP1			basal body
LRGUK		cilia, whole cell	cilia
LRRC18		cilia	cilia
LRRC23	cilia		cilia
LRRC34			cilia
LRRC45	basal body, whole cell		basal body
LRRC48	cilia	cilia	cilia
LRRC56			basal body
LRRC6			whole cell
LRRC67		nucleus, whole cell
LRRN4			cilia
LRWD1			basal body
LUM		cilia
MAGI3		basal body
MAK			basal body
MAPKBP1	nucleus, whole cell		basal body
MAST2	basal body	basal body
MAST3	whole cell		basal body
MBD1	whole cell
MDH1B	cilia		cilia
MDM1		basal body	basal body
ME2	whole cell	cilia
MED18		nucleus
MED19		cilia	basal body
METTL6	whole cell
MIPEP	cilia, whole cell		cilia
MLF1	cilia	cilia	cilia
MNS1	cilia	cilia	cilia
MORC1			basal body
MORN5	cilia		cilia
MPHOSPH6			basal body
MPHOSPH9			basal body
MPP4	cilia	cilia	cilia
MRAS		whole cell
MTFR1			basal body
MTMR6			basal body
MUC1	cilia, whole cell	cilia
MUC4	cilia, whole cell	cilia
MUT	whole cell		basal body
MYCBP	cilia	cilia	cilia
MYH10	whole cell
NAF1			basal body
NAT9			cilia
NAV3			basal body
NCS1	basal body	basal body
NEK11			basal body
NEK5	whole cell		cilia
NEXN			basal body
NGEF		basal body	cilia
NGLY1	whole cell
NIPAL3	whole cell
NMB	basal body		basal body
NQO2			basal body
NR2F1	whole cell
NUCB2	whole cell		whole cell
NUDC	whole cell		whole cell
OBSL1			cilia
ODF2		cilia	cilia
ODF2L	cilia		cilia, basal body
OGN			basal body
OSCP1	whole cell
OTUD7B	nucleus
PACRGL	basal body
PASK	whole cell		cilia, basal body
PAX6	nucleus
PCNT	whole cell	basal body	basal body
PCOLCE2			basal body, whole cell
PDE8B	whole cell		cilia
PDXK	whole cell
PFN2	whole cell
PHC1	whole cell		nucleus
PHF20	basal body, whole cell		cilia, basal body
PHF7	basal body
PISD			basal body
PLA2G6	basal body		basal body
PLCH1	whole cell		cilia
POC1A	whole cell
POC5	whole cell
POLG2	whole cell		cilia
POLR2A	basal body, nucleus
PON3			basal body
POSTN			basal body
PPM1E			cilia
PPP1R15A	whole cell
PPP1R16A			basal body
PPP2R4	whole cell		cilia
PPP4R4		whole cell
PRMT2	whole cell
PRPF40B			cilia
PTDSS2			cilia
PTGES3	whole cell		cilia
PTPN22			cilia, basal body
PTPN7	cilia, whole cell		cilia
PTX3			cilia
R3HDM2			basal body
RABL5	basal body	cilia	cilia
RALGPS2			cilia
RBKS	whole cell		whole cell
RBM5	whole cell
RDBP		whole cell
RDX			cilia
RFX3	nucleus	nucleus	nucleus
RHPN1	basal body	basal body	basal body
RILPL2			cilia
RNF125			basal body
RNF157			cilia, basal body
ROPN1L			cilia
RPGR	cilia		cilia
RSPH1	cilia	cilia	cilia
RSPH3	cilia	cilia	cilia
RSPH4A	cilia	cilia
RTDR1			cilia
RTTN		whole cell
RUVBL1	whole cell		whole cell
RUVBL2	whole cell
RYR3			basal body
S100G	whole cell
S1PR1	whole cell
SAMSN1			cilia
SCRN2			basal body
SCRN3			cilia
SEMA3A		basal body
SENP2	whole cell	basal body	basal body
SENP8		basal body
SFRP2	cilia
SLA			basal body
SLC27A2	whole cell		basal body, whole cell
SLC38A4			basal body
SLC6A12			basal body
SLC7A3			basal body
SLC9A3R1	whole cell	basal body
SMAP1		basal body
SMG1	whole cell
SMPDL3A	whole cell
SNTN	cilia	cilia	cilia
SNX11		whole cell
SPA17	cilia	cilia	cilia
SPAG17	cilia		cilia
SPAG6	cilia	cilia	cilia
SPAST			basal body
SPATA17		cilia	cilia
SPATA18	basal body	basal body
SPATA7			basal body
SPG20	whole cell
SPTBN1	whole cell	basal body
STK17B			basal body
STK32A			basal body
STK33			whole cell
STK36	basal body	cilia, basal body	cilia, basal body
STOX1			basal body
STXBP1			basal body
STXBP4			basal body, whole cell
SUPT6H			basal body
SVEP1			basal body
TACC1	basal body	basal body	basal body
TAGAP			basal body
TBCEL			basal body
TCF7			nucleus
TCHP		basal body	cilia, basal body
TCTE1			cilia
TCTN2	basal body		basal body
TCTN3			basal body
TEKT2	cilia	cilia	cilia
TFPI	whole cell		whole cell
TGFBR3			whole cell
TMC5	cilia		cilia
TMEM138	basal body	cilia	cilia
TMEM231	whole cell	whole cell	whole cell
TMEM67		cilia	basal body
TNFSF13B			cilia
TRAF3IP1	cilia, basal body	basal body	cilia
TRIM33	whole cell
TRIOBP			basal body
TSGA10			basal body
TSPAN13			cilia
TTC18			cilia
TTC25	cilia	cilia	cilia, whole cell
TTC26	basal body, whole cell	cilia, basal body	cilia
TTC29			cilia
TTLL6			basal body
TUBA1A	cilia	cilia	cilia
TUBD1	basal body	basal body
TUBE1			basal body
UBXN10	whole cell		whole cell
UBXN11		cilia	cilia
UHRF1BP1L			basal body
USP43	whole cell	basal body
WBP11	cilia	cilia	cilia
WDR16	cilia		cilia
WDR54	whole cell
WDR60	whole cell	basal body	cilia, basal body
WDR65	cilia	cilia	cilia
WISP1	whole cell
WRB	whole cell
XPNPEP3			whole cell
YES1		nucleus	basal body, nucleus
ZBBX	cilia		cilia
ZEB2			basal body
ZMYND10	whole cell
ZNF263		basal body
ZWINT	whole cell	whole cell	basal body
